# Supplementary material for: Epigenetic and integrative cross-omics analyses of cerebral white matter hyperintensities on MRI
Source: PubMed Central journal article supplement — Brain. 2022 Aug 9;146(2):492–506. doi: 10.1093/brain/awac290 (PMC9924914; doi:10.1093/brain/awac290), 2022-08-09
Supplement: awac290_supplementary_data.pdf [file awac290_supplementary_data.pdf]

## **TABLE OF CONTENTS**

### **Supplementary Data**

**Supplementary Data I.** Descriptions of participating studies

**Supplementary Data II.** WMH measurements in participating studies

**Supplementary Data III.** DNA methylation data collection and association study in participating studies

**Supplementary Data IV.** Gene expression data description

### **Supplementary Figures**

**Supplementary Figure 1** Forest plot of cg24202936 effect on WMH burden.

**Supplementary Figure 2** Regional plot for cg24202936 ( $\pm 50$  kb).

**Supplementary Figure 3** QQ plot in methylome-wide association  $P$  values for WMH burden.

**Supplementary Figure 4** Miami plot of methylome-wide associations in WMH burden.

**Supplementary Figure 5** Spearman correlation ( $P$  value) among target probes in ARIC subjects of European ancestry (ARIC-EA) and of African ancestry (ARIC-AA).

**Supplementary Figure 6** Manhattan plots of genome-wide associations for target CpGs.

**Supplemental Figure 7** Multiple trait colocalization and LocusCompare plots for the selected GWAS loci.

**Supplementary Figure 8** Overview of associations in relation to cg06809326.

### **Supplementary Tables**

**Supplementary Table 1** Demographic characteristics in participating cohorts

**Supplementary Table 2** Replications of single CpGs associated with white matter hyperintensities ( $P < 1 \times 10^{-5}$ )

**Supplementary Table 3** Associations of target CpGs in hypertensive and normotensive subjects

**Supplementary Table 4** Associations of target CpGs in subjects of European and African ancestry

**Supplementary Table 5** Single CpG association with white matter hyperintensities stratified by hypertension status ( $P < 1 \times 10^{-5}$ )

**Supplementary Table 6** Regulatory features at target CpGs

**Supplementary Table 7** Previously reported epigenetic associations for target CpGs

**Supplementary Table 8** Differentially Methylated Regions (DMRs) associated with white matter hyperintensities burden

**Supplementary Table 9** Gene-set enrichment analysis of identified DMRs

**Supplementary Table 10** Multivariate epigenetic associations of white matter hyperintensities burden and blood pressure

**Supplementary Table 11** Genetic Instruments for cg06809326 and cg24202936 and their associations with WMH burden

**Supplementary Table 12** Bi-directional Mendelian randomization (MR) analysis of target CpGs with at least 3 instruments

**Supplementary Table 13** Genetic Instruments for WMH burden and their associations with target CpGs

**Supplementary Table 14** Two-Step Mendelian randomization analysis for cg06809326

**Supplementary Table 15** CpG-WMH burden associations pooled at GWAS loci

**Supplementary Table 16** Multiple-trait colocalization of brain omics and white matter hyperintensities at the genome-wide association study loci

**Supplementary Table 17** Interindividual correlation between DNA methylation levels in blood and prefrontal cortex tissue

**Supplementary Table 18** Multiple trait co-localization of brain omics and white matter hyperintensities at cg24202936 and cg06809326

**Supplementary Table 19** Meta-analysis of GWAS, EWAS, and TWAS marker set enrichment associations (MERGEOMICS)

**Supplementary Table 20** The weighted key driver analysis (wKDA) using the Bayesian brain network

**Supplemental Table 21** Genes mapped to genetic, epigenetic, transcriptional associations used for enrichment in the Mergeomics analysis

**Supplementary Table 22** Drug repositioned for key drivers in the WMH gene network (PHARMOMICS)

### **Supplementary References**

## **SUPPLEMENTARY DATA**

### **SUPPLEMENTARY DATA I. DESCRIPTIONS OF PARTICIPATING STUDIES**

#### **Alzheimer's Disease Neuroimaging Initiative (ADNI)**

ADNI is a longitudinal, multi-site observational study including Alzheimer's disease (AD), mild cognitive impairment (MCI), and elderly individuals with normal cognition assessing clinical and cognitive measures, MRI and PET scans (FDG and 11C PIB) and blood and CNS biomarkers.<sup>1,2</sup> In 2004, the initial phase, ADNI-1, recruited 400 subjects with MCI, 200 subjects with early AD and 200 cognitively normal elderly from multiple site in North America. The study was extended with ADNI-GO in 2009 including 500 ADNI-1 subjects (normal controls and MCI cases) and 200 new early MCI cases. In 2011, one more extension, ADNI-2, started to study approximately 450-500 ADNI-1 subjects, 200 ADNI-GO subjects and 650 new cases (150 controls, 150 early MCI cases, 150 late MCI cases and 200 mild AD cases). In this study, 387 normal or early MCI subjects who provided brain MRI and methylation data were included. Brain MRI for WMH burden assessment was taken at ADNI-1 in 73 subjects and at ADNI-2 in 314 subjects. Samples for DNA methylation were drawn in ADNI-GO and ADNI-2 studies. Days between blood sampling and brain MRI were within 365 days in 85% of subjects (n=329), between a year and two years in 8% (n=31), between two and three years in 16 subjects and more than 3 years in 11 subjects.

#### ***Ethic Statement***

The study protocols for the ADNI studies were approved by the Institutional Review Boards of all the participating institutions.

#### ***Acknowledgements***

Data collection and sharing for this project was funded by the Alzheimer's Disease Neuroimaging Initiative (ADNI) (National Institutes of Health Grant U01 AG024904) and DOD ADNI (Department of Defense award number W81XWH-12-2-0012). ADNI is funded by the National Institute on Aging, the National Institute of Biomedical Imaging and Bioengineering, and through generous contributions from the following: AbbVie, Alzheimer's Association; Alzheimer's Drug Discovery Foundation; Araclon Biotech; BioClinica, Inc.; Biogen; Bristol-Myers Squibb Company; CereSpir, Inc.; Cogstate; Eisai Inc.; Elan Pharmaceuticals, Inc.; Eli Lilly and Company; EuroImmun; F. Hoffmann-La Roche Ltd and its affiliated company Genentech, Inc.; Fujirebio; GE Healthcare; IXICO Ltd.; Janssen Alzheimer Immunotherapy Research & Development, LLC.; Johnson & Johnson Pharmaceutical Research & Development LLC.; Lumosity; Lundbeck; Merck & Co., Inc.; Meso Scale Diagnostics, LLC.; NeuroRx Research; Neurotrack Technologies; Novartis Pharmaceuticals Corporation; Pfizer Inc.; Piramal Imaging; Servier; Takeda Pharmaceutical Company; and Transition Therapeutics. The Canadian Institutes of Health Research is providing funds to support ADNI clinical sites in Canada. Private sector contributions are facilitated by the Foundation for the National Institutes of Health ([www.fnih.org](http://www.fnih.org)). The grantee organization is the Northern California Institute for Research and Education, and the study is coordinated by the Alzheimer's Therapeutic Research Institute at the University of Southern California. ADNI data are disseminated by the Laboratory for Neuro Imaging at the University of Southern California.

## **Atherosclerosis Risk in Communities (ARIC) Study**

The ARIC Study is a prospective longitudinal investigation of the development of atherosclerosis and its clinical sequelae in which 15,792 individuals aged 45 to 64 years were enrolled at baseline.<sup>3</sup> At the inception of the study in 1987-1989, participants were selected by probability sampling from four communities in the United States: Forsyth County, North Carolina; Jackson, Mississippi (African-Americans only); suburbs of Minneapolis, Minnesota; and Washington County, Maryland. First four clinical examinations were carried out approximately at three-year intervals (exam 1, 1987-1989; exam 2, 1990-1992; exam 3, 1993-1995; exam 4, 1996-1998) and three additional examinations were completed on survivors in 2011-2013, 2016-2017, and 2018-2019. During the first 2 years of the exam 3, participants aged 55 and older from the Forsyth County and Jackson sites were invited to undergo a cranial MRI. DNA methylation was measured with the Infinium HumanMethylation450 BeadChip (HM450) array (Illumina Inc., San Diego, CA) on genomic DNA extracted from blood samples collected at visit 2 or 3. Besides, subjects were contacted semi-annually to update their medical histories between examinations since 2012. After QC, 906 European-American and 639 African-American subjects with methylation data and brain MRI were included in this study.

### ***Ethic Statement***

Written informed consent was provided by all study participants, and the study design and methods were approved by institutional review boards at the collaborating institutions: University of Mississippi Medical Center Institutional Review Board (Jackson Field Center); Wake Forest University Health Sciences Institutional Review Board (Forsyth County Field Center); University of Minnesota Institutional Review Board (Minnesota Field Center); the Johns Hopkins School of Public Health Institutional Review Board (Washington County Field Center); and the University of North Carolina Non-Biomedical Institutional Review Board.

### ***Acknowledgments***

The ARIC Study is carried out as a collaborative study supported by National Heart, Lung, and Blood Institute contracts (HHSN268201700001I, HHSN268201700002I, HHSN268201700003I, HHSN268201700004I, HHSN268201700005I). Neurocognitive data is collected by U01 2U01HL096812, 2U01HL096814, 2U01HL096899, 2U01HL096902, 2U01HL096917 from the NIH (NHLBI, NINDS, NIA and NIDCD), and with previous brain MRI examinations funded by R01-HL70825 from the NHLBI. Funding for methylation (HM450) data was supported by 5RC2HL102419 and R01NS087541. The authors thank the staff and participants of the ARIC Study for their important contributions.

## **The Brain Imaging, cognition, Dementia and next generation Genomics: a Transdisciplinary approach to search for risk and protective factors of neurodegenerative disease (BRIDGET) study**

The BRIDGET consortium comprises samples from Three City Dijon (3C-Dijon), Sydney Memory and Ageing Study (MAS), Older Australian Twins Study (OATS) and The Study of Health in Pomerania - TREND (SHIP-TREND) cohorts. Brief description and ethics statement of each participating cohort is described below:

A) Three City Dijon study (3C-Dijon): The Three City Dijon (3C-Dijon) study is a population-based cohort of 4931 French non-institutionalized individuals aged 65 years and older.<sup>4</sup> A total of 2,763 individuals aged  $\leq 80$  years were invited to undergo a brain MRI between June 1999 and September 2000. Participation rate was high (83%,  $n= 2,285$ ) but because of financial restrictions, only 1,924 MRI scans were performed. The Ethical Committee of the University Hospital of Kremlin-Bicêtre approved the study protocol. All participants signed an informed consent to participate in the study.

B) Sydney Memory and Ageing Study (MAS): The Sydney Memory and Ageing Study began in 2005 and is a longitudinal community-based study investigating mild cognitive impairment and the rate of cognitive change over time. Participants aged 70-90 years were randomly recruited from the compulsory electoral roll in Sydney, Australia. Exclusion criteria included limited English or a medical/psychological condition that would prevent them from completing assessments, dementia diagnosis and an age, non-English speaking background and education-adjusted MMSE score of  $< 24$ . More information can be found in Sachdev et al., 2010.<sup>5</sup> Written informed consent was provided by all participants and the study was approved by the Human Research Ethics Committees of UNSW Sydney and the South Eastern Sydney and Illawarra Area Health Service.

C) Older Australian Twins Study (OATS): see OATS section below.

D) Study of Health in Pomerania (SHIP-TREND): see SHIP-TREND section below.

### ***Definition of Extreme-SVD***

In individual participating cohorts, the composite extreme phenotype of SVD (extreme-SVD) was defined based on the distribution of WMH volume, presence or absence of lacunes, presence or absence of brain infarct.<sup>6</sup> Prior to defining extreme-SVD we also removed participants with brain tumors, stroke, or dementia at baseline. The objective was to define a group with extensive SVD severity (individuals in the upper quartile of WMH distribution and having one or more brain infarcts) and a group with minimal SVD severity (lower quartile of WMH distribution and without any brain infarcts). As smoking affects methylation in blood, we also removed current smokers from the subset of extreme-SVD participants. Following table shows the number of extreme-SVD participants defined in individual cohorts:

| Cohort                   | 3C-Dijon | MAS | OATS | SHIP-TREND | Total |
|--------------------------|----------|-----|------|------------|-------|
| N with MRI               | 1,924    | 530 | 412  | 2,189      | 5,055 |
| N extensive SVD “cases”  | 90       | 75  | 56   | 90         | 311   |
| N minimal SVD “controls” | 90       | 76  | 53   | 90         | 309   |
| N extreme-SVD            | 180      | 151 | 109  | 180        | 620   |

### ***Methyl C-Sequencing and data processing***

The DNA samples of defined extreme-SVD participants in individual cohorts was sent to the McGill Genome Center, Montreal, Canada for high depth Methyl C-Seq sequencing. In 3C-Dijon and SHIP cohort the DNA was extracted from buffy coat using Qiagen protocol, whereas in MAS and OATS cohorts for majority of samples the DNA was extracted from whole blood using the Qiagen Autopure method. The samples were profiled through targeted methylation sequencing as previously described.<sup>7</sup> Briefly, in MCC-Seq a whole-genome sequencing library is prepared and bisulfite converted, amplified and a capture enriching for targeted bisulfite-converted DNA

fragments is carried out following which the captured DNA was amplified and sequenced on the Illumina HiSeq2000/2500 system using 100-bp paired-end sequencing.

Sequenced reads were aligned to reference human genome build GRCh38 using BWA v.0.6 software employing the BISMARK pipeline.<sup>8</sup> We removed (i) clonal reads, (ii) reads with low mapping quality score (<20), (iii) reads with more than 2% mismatch to converted reference over the alignment length, (iv) reads mapping on the forward and reverse strand of the bisulfite converted genome, (v) read pairs not mapped at the expected distance based on library insert size, and (vi) read pairs that mapped in the wrong direction. At each CpG sites we computed Methylation score using following formula:

Methylation score = Total non-converted C reads / Total reads

We applied following benchmark filtering to avoid potential biases in downstream analyses:  $\geq 5$  total reads, no overlap with SNPs (dbSNP 137),  $\leq 20\%$  methylation difference between strands, no off-target reads and no overlap with DAC Blacklisted Regions (DBRs) or Duke Excluded Regions (DERs) generated by the ENCODE project: (<http://hgwdev.cse.ucsc.edu/cgi-bin/hgFileUi?db=hg19&g=wgEncodeMapability>).

### ***Acknowledgments***

This work is supported by: grants overseen by the French National Research Agency (ANR) as part of the “Investments d’Avenir” Programme ANR-18-RHUS-002; the EU Joint Programme - Neurodegenerative Disease Research (JPND) project, through the following funding organisations under the aegis of JPND -[www.jpnd.eu](http://www.jpnd.eu). Australia, National Health and Medical Research Council, Austria, Federal Ministry of Science, Research and Economy; Canada, Canadian Institutes of Health Research; France, French National Research Agency; Germany, Federal Ministry of Education and Research; Netherlands, The Netherlands Organisation for Health Research and Development; United Kingdom, Medical Research Council; funding from the European Union’s Horizon 2020 research and innovation programme under grant agreements No 643417 and No 640643. Part of the computations for this work were performed at the Bordeaux Bioinformatics Center (CBiB) and the CREDIM (Centre de recherche et de développement en informatique) of the University of Bordeaux, for which funding supported was provided to Dr. Debette by the Fondation Claude Pompidou. Part of the data analyses were enabled by compute and storage resources provided by Compute Canada and Calcul Québec.

*Three City Dijon study (3C-Dijon)*: The Three City (3C) Study is conducted under a partnership agreement among the Institut National de la Santé et de la Recherche Médicale (INSERM), the University of Bordeaux, and Sanofi-Aventis. The Fondation pour la Recherche Médicale funded the preparation and initiation of the study. The 3C Study is also supported by the Caisse Nationale Maladie des Travailleurs Salariés, Direction Générale de la Santé, Mutuelle Générale de l’Education Nationale (MGEN), Institut de la Longévité, Conseils Régionaux of Aquitaine and Bourgogne, Fondation de France, and Ministry of Research–INSERM Programme “Cohortes et collections de données biologiques.” We thank Dr. Anne Boland (CNG) for her technical help in preparing the DNA samples for analyses. This work was supported by the National Foundation for Alzheimer’s disease and related disorders, the Institut Pasteur de Lille, the labex DISTALZ and the Centre National de Génotypage.

*Sydney Memory and Ageing Study (MAS)*: We thank the participants and their informants for their time and generosity in contributing to this research. We also acknowledge the MAS research team:

<https://cheba.unsw.edu.au/research-projects/sydney-memory-and-ageing-study>. The Sydney Memory and Ageing Study has been funded by three National Health & Medical Research Council (NHMRC) Program Grants (ID No. ID350833, ID568969, and APP1093083). Collection of the methylation data was supported by the NHMRC National Institute for Dementia Research Grant APP1115462.

*Older Australian Twins Study (OATS)*: see OATS – acknowledgements below.

*Study of Health in Pomerania (SHIP-TREND)*: see SHIP-TREND – acknowledgements below.

### **Coronary Artery Risk Development in Young Adults (CARDIA)**

Coronary Artery Disease Risk Development in Young Adults (CARDIA) is a longitudinal study designed to trace the development of risk factors for coronary heart disease in 5,115 relatively young individuals aged 18-30 (52% African American and 55% women).<sup>9</sup> The study collected information on anthropometric, lifestyle factors as well as biomarkers including brain MRI, genetic and DNA methylation data. Baseline measurements were repeated, and additional measurements performed, at Years 2, 5, 7, 10, 15, 20, 25, and 30. DNA methylation level was measured in 1,089 subjects at the examination year 15 and 1,092 subjects at the year 20. In this study, 167 subjects of European and 110 subjects of African-ancestry with the brain MRI image were contributed from CARDIA.

#### ***Ethic Statement***

The CARDIA study is multicenter with recruitment in Birmingham, AL; Chicago, IL; Minneapolis, MN; and Oakland, CA. The study protocol was approved by the institutional review boards of the coordinating center and the 4 participating field centers, and written informed consent was obtained from participants at all examinations.

#### ***Acknowledgments***

The Coronary Artery Risk Development in Young Adults Study (CARDIA) is conducted and supported by the National Heart, Lung, and Blood Institute (NHLBI) in collaboration with the University of Alabama at Birmingham (HHSN268201300025C & HHSN268201300026C), Northwestern University (HHSN268201300027C), University of Minnesota (HHSN268201300028C), Kaiser Foundation Research Institute (HHSN268201300029C), and Johns Hopkins University School of Medicine (HHSN268200900041C). CARDIA is also partially supported by the Intramural Research Program of the National Institute on Aging (NIA) and an intra-agency agreement between NIA and NHLBI (AG0005).

### **Cardiovascular Health Study (CHS)**

The CHS is a population-based cohort study of risk factors for coronary heart disease and stroke in adults  $\geq 65$  years conducted across four field centers in the United States: Sacramento County, California; Washington County, Maryland; Forsyth County, North Carolina; and Pittsburgh, Allegheny County, Pennsylvania. The original cohort of 5,201 persons, predominantly

of European ancestry, was recruited in 1989-1990 from random samples of the Medicare eligibility lists. Later, 687 African-Americans were added to the cohort, making the total cohort of 5,888.<sup>10</sup> DNA methylation was measured on a randomly selected subjects without presence of coronary heart disease, congestive heart failure, peripheral vascular disease, valvular heart disease, stroke or transient ischemic attack at the exam year 5. Post QC, 378 European ancestry and African-American participants with methylation data and brain MRI were included in this study.

#### ***Ethic Statement***

Written informed consent to genetic research has been obtained on all individuals included in this study. CHS was approved by institutional review committees at each field center and individuals in the present analysis had available DNA and gave informed consent including consent to use of genetic information for the study of cardiovascular disease. The DNA methylation dataset from CHS can be requested at <https://chs-nhlbi.org/node/6222>.

#### ***Acknowledgements***

Infrastructure for the CHARGE Consortium is supported in part by the National Heart, Lung, and Blood Institute grant R01HL105756. The CHS research was supported by NHLBI contracts HHSN268201200036C, HHSN268200800007C, N01HC55222, N01HC85079, N01HC85080, N01HC85081, N01HC85082, N01HC85083, N01HC85086, N01HC15103; and NHLBI grants U01HL080295, R01HL087652, R01HL092111, R01HL105756, R01HL103612, R01HL111089, R01HL116747 and R01HL120393 with additional contribution from the National Institute of Neurological Disorders and Stroke (NINDS). Additional support was provided through R01AG023629 and R01AG033193 from the National Institute on Aging (NIA) as well as Laughlin Family, Alpha Phi Foundation, and Locke Charitable Foundation. A full list of principal CHS investigators and institutions can be found at CHS-NHLBI.org. The provision of genotyping data was supported in part by the National Center for Advancing Translational Sciences, CTSI grant UL1TR000124, and the National Institute of Diabetes and Digestive and Kidney Disease Diabetes Research Center (DRC) grant DK063491 to the Southern California Diabetes Endocrinology Research Center. The content is solely the responsibility of the authors and does not necessarily represent the official views of the National Institutes of Health.

#### **Framingham Heart Study (FHS) offspring cohort**

The FHS is a single-site, community-based, ongoing cohort study that was initiated in 1948 to investigate prospectively the risk factors for CVD. The Original cohort (n=5,209) were randomly recruited in the town of Framingham, MA, USA, and examined every 2 year since 1948; their children and spouses of the children (n=5,124), the Offspring cohort, were enrolled in 1971 and examined approximately every 4 year since 1971.<sup>11,12</sup> DNA methylation was measured on 2,846 Offspring participants around 8th examination cycle (2005-2008). The 4,095 adult children of the Offspring cohort subjects were recruited from 2002 to 2005 as the FHS-3rd Gene cohort.<sup>13</sup> DNA methylation was measured in 1,549 3rd Gen cohort subjects during their second visit (2005-2008). Brain MRI in Gen 3 was collected from 2009 to 2012 in 1963 subjects.

The Offspring cohort with both DNA methylation and MRT measures (n=1,726) was included in the discovery set. We performed the association analyses separately in 403 subjects with the double-spin echo MRI scan and 1,323 subjects with the flair MRI scan. The 865 3rd Gen cohort subjects with DNA methylation and MRI scan were included in a replication study.

#### ***Ethic Statement***

Written informed consent to genetic research has been obtained on all individuals included in this study. Ethics permission for FHS and genetic research in FHS was obtained from the Institutional Review Board of Boston University Medical Campus (IRB number H-32132, H-26671)

### ***Acknowledgements***

This work was supported by the National Heart, Lung and Blood Institute's Framingham Heart Study Contract No. N01-HC-25195 and No. HHSN268201500001I, and by grants from the National Institute of Aging (R01s AG033193, AG008122, AG054076, AG033040, AG049607, AG05U01-AG049505), and the National Heart, Lung and Blood Institute (R01 HL093029, HL096917). The laboratory work for this investigation was funded by the Division of Intramural Research, National Heart, Lung, and Blood Institute, National Institutes of Health, and by NIH contract N01-HC-25195. The computational work reported in this paper was performed on the Shared Computing Cluster which is administered by Boston University's Research Computing Services. We thank all the FHS study participants and staff to make this research possible.

### **Genetic Epidemiology Network of Arteriopathy (GENOA)**

The Genetic Epidemiology Network of Arteriopathy (GENOA) study was designed to investigate the genetics of hypertension and target organ damage in hypertensive sibships.<sup>14</sup> The GENOA study is a community-based study including African Americans from Jackson, Mississippi and non-Hispanic whites from Rochester, Minnesota.<sup>9</sup> The initial GENOA study, from 1996 to 2001, recruited any members in sibships having more than two individuals with clinically diagnosed hypertension before age 60. Exclusion criteria of the GENOA study were secondary hypertension, alcoholism or drug abuse, pregnancy, insulin-dependent diabetes mellitus, or active malignancy. Eighty percent of African Americans (1,482 subjects) and 75% of non-Hispanic whites (1,213 subjects) from the initial study population returned for the second examination (Phase II: 2001-2005). Study visits were made in the morning after an overnight fast of at least eight hours. Demographic information, medical history, clinical characteristics, lifestyle factors, and blood samples were collected in each phase. DNA methylation levels were measured only in African Americans participants. After quality control, DNA methylation and brain MRI data were available for 356 African Americans.

### ***Ethic Statement***

Written informed consent was obtained from all subjects, and approval was granted by participating institutional review boards at the University of Mississippi Medical Center, the Mayo Clinic, and the University of Michigan.

### ***Acknowledgements***

Support for the Genetic Epidemiology Network of Arteriopathy (GENOA) was provided by the National Heart, Lung and Blood Institute (U01HL054457, RC1HL100185, R01HL119443, and R01HL133221) and the National Institute for Neurological Disorders and Stroke (R01NS041558).



### **Lothian Birth Cohort 1936 (LBC1936)**

The Lothian Birth Cohorts of 1936 (LBC1936) is a longitudinal study of ageing. Participants were born in 1936 and mostly live in the Lothian region of Scotland.<sup>15,16</sup> The study was derived of the Scottish Mental Surveys of 1947 that conducted a general cognitive ability test on nearly all 11-year-old children in Scotland. Residents in the Lothian area of Scotland (n=1,091) were recruited in late-life at mean age 70 and followed-up at their ages 70, 73, and 76. In this study, 230 subjects who provided epigenetic information and brain imaging, blood biomarkers and anthropomorphic and lifestyle measures were included.

#### ***Ethic Statement***

Following written informed consent, venesected whole blood was collected for DNA extraction. Ethics permission for the LBC1936 was obtained from the Multi-Centre Research Ethics Committee for Scotland (Wave 1: MREC/01/0/56), the Lothian Research Ethics Committee (Wave 1: LREC/2003/2/29), and the Scotland A Research Ethics Committee (Waves 2 and 3: 07/MRE00/58).

#### ***Acknowledgements***

We thank the cohort participants and team members who contributed to these studies. Phenotype collection in the Lothian Birth Cohort 1936 was supported by Age UK (The Disconnected Mind project). Methylation typing was supported by the Centre for Cognitive Ageing and Cognitive Epidemiology (Pilot Fund award), Age UK, The Wellcome Trust Institutional Strategic Support Fund, The University of Edinburgh, and The University of Queensland. Analysis of these data were carried out within the University of Edinburgh Centre for Cognitive Ageing and Cognitive Epidemiology (CCACE). CCACE is supported by funding from the BBSRC, the Medical Research Council (MRC), and the University of Edinburgh as part of the cross-council Lifelong Health and Wellbeing initiative (MR/K026992/1). Funding from the Australian NHMRC (613608) supported quality control analysis of the methylation data.

### **Older Australian Twin Studies (OATS)**

Participants were recruited from the Australian Twin Registry and also through a recruitment drive. At baseline, participants were aged 65 years and over. Inclusion criteria included an ability to consent, a co-twin who also consented to participate, completion of some education in English and residence in one of the three eastern states (Victoria, New South Wales, Queensland). Exclusion criteria included inadequate English to complete the assessment, current diagnosis of malignancy or other life-threatening medical illness and/or a current acute psychosis diagnosis. At baseline, there were 623 participants with a mean age of 70.77 years and 65.2% of the sample were women. For further details see Sachdev et al. (2009) and Sachdev et al. (2011).<sup>17,18</sup> For the current study, one twin from each pair with both methylation and brain MRI data were included (n=81).

#### ***Ethic Statement***

Written informed consent was obtained from all participants and approval for the study was obtained from the ethics committees of the Australian Twin Registry, University of New South Wales, University of Melbourne, Queensland Institute of Medical Research and the South Eastern Sydney and Illawarra Area Health Service.

#### ***Acknowledgements***

We thank the OATS participants for their time and generosity in contributing to this research. We acknowledge the contribution of the OATS research team (<https://cheba.unsw.edu.au/project/older-australian-twins-study>) to this study. The OATS study has been funded by a National Health & Medical Research Council (NHMRC) and Australian Research Council (ARC) Strategic Award Grant of the Ageing Well, Ageing Productively Program (ID No. 401162); NHMRC Project Grants (ID No. 1045325); and NHMRC Program Grants (ID No. 568969 and 1093083). Collection of the methylation data was supported by the NHMRC National Institute for Dementia Research Grant APP1115462. This research was facilitated through access to Twins Research Australia, a national resource supported by a Centre of Research Excellence Grant (ID No. 1079102) from the National Health and Medical Research Council.

This research was facilitated through access to Twins Research Australia, a national resource supported by a Centre of Research Excellence Grant (ID No. 1079102) from the National Health and Medical Research Council.

### **Rotterdam Study III (RS3)**

The Rotterdam Study is a prospective, population-based cohort study that includes inhabitants of the well-defined district Ommoord, located in the city of Rotterdam in the Netherlands.<sup>19-21</sup> The cohort was initiated in 1990 among approximately 7,900 persons aged 55 years and older, who underwent a home interview and extensive physical examination at the baseline and during the follow-up rounds every 3-4 years (RS-I). The cohort was extended in 2000-2001 (RS-II, 3,011 individuals, aged 55 years and older) and 2006-2008 (RS-III, 3,932 individuals aged 45 and older). Collected data include genetic information, epigenetic information, imaging (of heart, blood vessels, eyes, skeleton and brain) and numerous blood biomarkers, anthropomorphic and lifestyle measures.<sup>19,20</sup> Post QC, DNA methylation and brain MRI used for the analyses were available in 547 subjects from the first visit of RS-III and 442 subjects from the fifth visit of RS-I, the third visit of RS-II and the second visit of RS-III. The latter dataset is part of the Biobanking and Biomolecular Resources Research Infrastructure for The Netherlands (BBMRI-NL), BIOS (Biobank-based Integrative Omics Studies) project [<http://www.bbMRI.nl/?p=259>]. Whole blood DNA methylation was quantified in a random subset of 750 individuals with genotyping and RNA expression data available in the first cohort of RS-III.

#### ***Ethic Statement***

The Rotterdam Study has been approved by the Medical Ethics Committee of the Erasmus MC (registration number MEC 02.1015) and by the Dutch Ministry of Health, Welfare and Sport (Population Screening Act WBO, license number 1071272-159521-PG). The Rotterdam Study has been entered into the Netherlands National Trial Register (NTR; [www.trialregister.nl](http://www.trialregister.nl)) and into the WHO International Clinical Trials Registry Platform (ICTRP; [www.who.int/ictrp/network/primary/en/](http://www.who.int/ictrp/network/primary/en/)) under shared catalogue number NTR6831. All participants provided written informed consent to participate in the study and to have their information obtained from treating physicians.

#### ***Acknowledgements***

The generation and management of the Illumina 450K methylation array data (EWAS data) for the Rotterdam Study was executed by the Human Genotyping Facility of the Genetic Laboratory of the Department of Internal Medicine, Erasmus MC, the Netherlands. The EWAS data was funded

by the Genetic Laboratory of the Department of Internal Medicine, Erasmus MC, and by the Netherlands Organization for Scientific Research (NWO; project number 184021007) and made available as a Rainbow Project (RP3; BIOS) of the Biobanking and Biomolecular Research Infrastructure Netherlands (BBMRI-NL). We thank Mr. Michael Verbiest, Ms. Mila Jhamai, Ms. Sarah Higgins, Mr. Marijn Verkerk, and Lisette Stolk PhD for their help in creating the methylation database.

The Rotterdam Study is funded by Erasmus Medical Center and Erasmus University, Rotterdam, Netherlands Organization for the Health Research and Development (ZonMw), the Research Institute for Diseases in the Elderly (RIDE), the Ministry of Education, Culture and Science, the Ministry for Health, Welfare and Sports, the European Commission (DG XII), and the Municipality of Rotterdam. The authors are grateful to the study participants, the staff from the Rotterdam Study and the participating general practitioners and pharmacists. HSHA is supported by ZonMW grant number 916.19.151.

### **Rhineland Study**

The Rhineland Study is an ongoing single-center, community-based, prospective cohort study that emphasizes deep phenotyping.<sup>22,23</sup> Participants are 30 years and above at baseline and recruited from two geographically defined areas in the city of Bonn, Germany. Core data collection includes extensive structural and functional brain imaging, cognitive and behavioral assessments, cardiovascular investigations, sensory systems assessments, questions on medical history, medication intake, life style, nutrition and mental health, and extensive collection of biomaterials. In this study, 2,111 participants with both DNA methylation data and brain MRI were included.

#### ***Ethic Statement***

Approval to undertake the study was obtained from the ethics committee of the University of Bonn, Medical Faculty. We obtained written informed consent from all participants in accordance with the Declaration of Helsinki.

#### ***Acknowledgements***

The Rhineland Study is funded by German Center for Neurodegenerative Diseases (DZNE). MMBB is supported by the Deutsche Forschungsgemeinschaft (DFG, German Research Foundation) under Germany's Excellence Strategy – EXC2151 – 390873048, and by the Diet-Body-Brain Competence Cluster in Nutrition Research funded by the Federal Ministry of Education and Research (grant numbers 01EA1410C and 01EA1809C). DL is supported by a scholarship from China Scholarship Council.

### **The Study of Health in Pomerania - TREND (SHIP-TREND)**

The Study of Health in Pomerania (SHIP-TREND) is a longitudinal population-based cohort study in West Pomerania, a region in the northeast of Germany, assessing the prevalence and incidence of common population-relevant diseases and their risk factors. Baseline examinations for SHIP-TREND were carried out between 2008 and 2012, comprising 4,420 participants aged 20 to 81 years. Study design and sampling methods were previously described.<sup>24</sup> The medical ethics

committee of the University of Greifswald approved the study protocol, and oral and written informed consents were obtained from each of the study participants. DNA was extracted from blood samples of n=256 SHIP-TREND participants to assess DNA methylation using the Illumina HumanMethylationEPIC BeadChip array. Samples were randomly selected based on availability of multiple OMICS data, excluding type II diabetes, and enriched for prevalent MI. The samples were taken between 07:00 AM and 04:00 PM, and serum aliquots were prepared for immediate analysis and for storage at -80 °C in the Integrated Research Biobank (Liconic, Liechtenstein). Processing of the DNA samples was performed at the Helmholtz Zentrum München. Whole body MRI was offered to all study participants. After exclusion of subjects who refused participation or who fulfilled exclusion criteria for MRI (e.g. cardiac pacemaker), 2189 subjects from SHIP-TREND-0 underwent the MRI scanning. After exclusion of scans with technical artifacts, major structural abnormalities and stroke, full data sets with EWAS data and MRI scans were available in 214 subjects in SHIP-TREND. The extreme-SVD cases and controls for BRIDGET were taken from a non-overlapping subsample of the TREND cohort without diabetes mellitus.

### ***Ethic Statement***

SHIP and SHIP TREND were approved by the local ethics committee. After complete description of the study to the subjects, written informed consent was obtained. The medical ethics committee of the University of Greifswald approved the study protocol, and oral and written informed consents were obtained from each of the study participants.

### ***Acknowledgements***

SHIP is part of the Community Medicine Research net of the University of Greifswald, Germany, which is funded by the Federal Ministry of Education and Research (grants no. 01ZZ9603, 01ZZ0103, and 01ZZ0403), the Ministry of Cultural Affairs as well as the Social Ministry of the Federal State of Mecklenburg-West Pomerania, and the network 'Greifswald Approach to Individualized Medicine (GANI\_MED)' funded by the Federal Ministry of Education and Research (grant 03IS2061A). DNA methylation data have been supported by the DZHK (grant 81X3400104). The University of Greifswald is a member of the Caché Campus program of the InterSystems GmbH. The SHIP authors are grateful to Paul S. DeVries for his support with the EWAS pipeline.

## SUPPLEMENTARY DATA II. WMH MEASUREMENTS IN PARTICIPATING STUDIES

| Study                             | MRI technology                                                                                                                          | Scanning Protocol                                                                                                                                                                                                 | Image Processing                                                                                                                                                                                                                                                                                                                                                                | WMH quantification                                                                                                                                                                                                                                                                                                                                                                                                                                                                                                                                                                                                                                                                                                                                                                                                                                                                                                                                                                                                        |
|-----------------------------------|-----------------------------------------------------------------------------------------------------------------------------------------|-------------------------------------------------------------------------------------------------------------------------------------------------------------------------------------------------------------------|---------------------------------------------------------------------------------------------------------------------------------------------------------------------------------------------------------------------------------------------------------------------------------------------------------------------------------------------------------------------------------|---------------------------------------------------------------------------------------------------------------------------------------------------------------------------------------------------------------------------------------------------------------------------------------------------------------------------------------------------------------------------------------------------------------------------------------------------------------------------------------------------------------------------------------------------------------------------------------------------------------------------------------------------------------------------------------------------------------------------------------------------------------------------------------------------------------------------------------------------------------------------------------------------------------------------------------------------------------------------------------------------------------------------|
| ADNI <sup>25-27</sup>             | 1.5T (ADNI-1) and 3T (ADNI-2) MRI scanners from General Electric Medical Systems, Philips Medical Systems, or Siemens Medical Solutions | A series of sagittal T1-weighted scans and axial proton-density (PD)/ T2-weighted fast spin echo scans. T1-, T2- and PD-weighted MRI scans were co-registered, and skull stripped, then corrected for bias field. | ADNI-1: Brain images were reviewed by a neuroradiologist to exclude infarcts and other abnormalities and graded by a trained individual. ADNI-2: the FreeSurfer software package version 4.3 and 5.1 ( <a href="http://surfer.nmr.mgh.harvard.edu/">http://surfer.nmr.mgh.harvard.edu/</a> ) by the Schuff and Tosun laboratory at the University of California-San Francisco   | ADNI-1: WMH was quantified based on T1-, T2- and PD- intensities, the prior probability of WMH, and the probability of WMH conditioned on the presence of WMH at neighboring voxels. ADNI-2: WMH was measured with a Bayesian approach using segmentation of high-resolution 3D T1 and FLAIR sequences.                                                                                                                                                                                                                                                                                                                                                                                                                                                                                                                                                                                                                                                                                                                   |
| ARIC <sup>28</sup>                | 1.5-Tesla scanners (General Electric Medical Systems or Picker Medical Systems)                                                         | A series of sagittal T1-weighted scans and axial PD, T2- weighted and T1-weighted scans with 5 mm thickness and no interslice gaps.                                                                               | Images were interpreted directly from a PDS-4 digital workstation consisting of four 1024 X 1024-pixel monitors capable of displaying all 96 images simultaneously.                                                                                                                                                                                                             | WMHs were estimated as the relative total volume of periventricular and subcortical WM signal abnormality on proton density- weighted axial images by visual comparison with eight templates that successively increased from barely detectable WM changes (Grade 1) to extensive, confluent changes (Grade 8). Individuals with no WM changes received Grade 0, and those with changes worse than Grade 8 received Grade 9.                                                                                                                                                                                                                                                                                                                                                                                                                                                                                                                                                                                              |
| BRIDGET-3C-Dijon <sup>29,30</sup> | a 1.5 T Magnetom scanner (Siemens)                                                                                                      | T1-weighted, T2-weighted, and proton density-weighted sequences                                                                                                                                                   | T1- and T2-weighted images of each subject were first aligned to each other using the AIR package. These images were then further analyzed with the optimized Voxel-Based Morphometry (VBM) protocol, using Statistical Parametric Mapping 99 (SPM99) that we modified in order to consider the structural characteristics of the aged brain, as described in detail elsewhere. | Fully automated image processing software was developed to detect and localize WMH and to measure WMH volume. <sup>29</sup> Infarcts were rated on T <sub>1</sub> -, T <sub>2</sub> - and proton density-weighted images by the same examiner (Y.-C.Z.), using a standardized assessment grid, to visually review all brain scans. Lacunes were defined as infarcts 3–15 mm in diameter having the same signal characteristics as cerebrospinal fluid on all sequences, located in basal ganglia, brainstem or cerebral white matter. Characteristics of lesions were visualized simultaneously in axial, coronal, and sagittal planes to discriminate them from dilated perivascular spaces. Lesions with a typical vascular shape and following the orientation of perforating vessels were regarded as dilated perivascular spaces. <sup>30</sup> The nomenclature of MRI markers of SVD in our study is consistent with the recently proposed neuroimaging standards for research into SVD (STRIVE). <sup>31,32</sup> |
| BRIDGET-MAS <sup>33</sup>         | A Philips 3T Intera Quasar scanner was used in the first half of the cohort, and a Philips 3T Achieva Quasar Dual scanner               | The two scanners were set to the same parameters:<br>T1-weighted MRI – TR = 6.39 ms, TE = 2.9 ms, flip angle = 8°, matrix size = 256 × 256, FOV (field of                                                         | Both image preprocessing and the quantification of WMH were done automatically by using UBO Detection (Ref). Briefly, the preprocessing included registering T2-FLAIR to corresponding T1 image, tissue                                                                                                                                                                         | Briefly, for WMH extraction, a k-nearest neighbour (kNN)-based classifier was applied to FAST-segmented clusters to classify the clusters into WMH or non-WMH through considering intensity, anatomical location, and cluster size features. The segmented WMH were visually checked for segmentation accuracy.                                                                                                                                                                                                                                                                                                                                                                                                                                                                                                                                                                                                                                                                                                           |

| Study                | MRI technology                                                               | Scanning Protocol                                                                                                                                                                                                                                                                                                               | Image Processing                                                                                                                                                                                                                                                                                                                                                                                                                                                                                                                             | WMH quantification                                                                                                                                                                                                                                                                                                                                                                                                           |
|----------------------|------------------------------------------------------------------------------|---------------------------------------------------------------------------------------------------------------------------------------------------------------------------------------------------------------------------------------------------------------------------------------------------------------------------------|----------------------------------------------------------------------------------------------------------------------------------------------------------------------------------------------------------------------------------------------------------------------------------------------------------------------------------------------------------------------------------------------------------------------------------------------------------------------------------------------------------------------------------------------|------------------------------------------------------------------------------------------------------------------------------------------------------------------------------------------------------------------------------------------------------------------------------------------------------------------------------------------------------------------------------------------------------------------------------|
|                      | was applied to the second half of the sample                                 | view) = 256 × 256 × 190, and slice thickness = 1 mm with no gap in between, yielding 1 × 1 × 1 mm <sup>3</sup> isotropic voxels.<br><br>T2-weighted FLAIR – TR = 10000 ms, TE = 110 ms, TI = 2800 ms, matrix size = 512 × 512, slice thickness = 3.5 mm without gap, and in plane resolution = 0.488 × 0.488 mm.                | segmentation using SPM12, warping to s sample-specific DARTEL space, non-brain tissue removal, bias field correction, and segmentation using FSL FAST.                                                                                                                                                                                                                                                                                                                                                                                       |                                                                                                                                                                                                                                                                                                                                                                                                                              |
| CARDIA <sup>34</sup> | 3T scanners (Siemens Medical Solutions and Philips Medical Systems)          | A sequence of sagittal 3DT2 with slice thickness 1 mm; sagittal 3D FLAIR with slice thickness 1 mm; and sagittal 3D MPRAGE with slice thickness 1mm.                                                                                                                                                                            | Structural MR images were processed using previously described methods that were based on an automated multispectral computer algorithm.                                                                                                                                                                                                                                                                                                                                                                                                     | We classified all supratentorial brain tissue into GM, WM, and CSF. GM and WM were characterized as normal and abnormal (ischemic).                                                                                                                                                                                                                                                                                          |
| CHS <sup>28</sup>    | General Electric or Picker 1.5-Tesla scanners and Toshiba 0.35-Tesla scanner | A series of sagittal T1-weighted scans and axial PD, T2- weighted and T1-weighted scans with 5 mm thickness and no interslice gaps.                                                                                                                                                                                             | Images were interpreted directly from a PDS-4 digital workstation consisting of four 1024 X 1024-pixel monitors capable of displaying all 96 images simultaneously.                                                                                                                                                                                                                                                                                                                                                                          | WMHs were estimated as the relative total volume of periventricular and subcortical WM signal abnormality on proton density- weighted axial images by visual comparison with eight templates that successively increased from barely detectable WM changes (Grade 1) to extensive, confluent changes (Grade 8). Individuals with no WM changes received Grade 0, and those with changes worse than Grade 8 received Grade 9. |
| FHS                  | 1 or 1.5 T Siemens Magnetom scanner                                          | Offspring cohort: 3D T1 and double echo proton density and T2 double spin echo (DSE) coronal images were acquired in 4-mm contiguous slices (n=403) and MRI scans with the FLAIR sequences were taken in 3-mm slices (n=1,323).<br>3rd Generation cohort: MRI scans with the FLAIR sequences were taken in 3-mm slices (n=865). | Analyzed with QUANTA 6.2 at the University of California–Davis Medical Center. Images were analyzed and interpreted blind to subject data and in random order. Semi-automated analysis of pixel distributions, based on mathematical modeling of MRI pixel intensity histograms for CSF, WM, and GM, were used to determine the optimal threshold of pixel intensity to best distinguish CSF from brain matter based on previously published methods. The intracranial vault above the tentorium was outlined manually to determine the TIV. | For segmentation of WMH from other brain tissues the first and second echo images from T2 sequences were summed and a lognormal distribution was fitted to the summed data (after removal of CSF and correction of image intensity non-uniformities). A segmentation threshold for WMH was determined as 3.5 standard deviations in pixel intensity above the mean of the fitted distribution of brain parenchyma.           |
| GENOA <sup>35</sup>  | 1.5 T MRI scanner from General                                               | FLAIR images consisting of 48 contiguous 3-mm interleaved slices                                                                                                                                                                                                                                                                | A fully automated algorithm was used to segment each slice of the edited                                                                                                                                                                                                                                                                                                                                                                                                                                                                     | Interactive imaging processing steps were performed by a research associate who had no knowledge of the subjects' personal or medical                                                                                                                                                                                                                                                                                        |

| Study                                   | MRI technology                                                                                                                                                                                                                                                | Scanning Protocol                                                                                                                                                                                                                                                                                                                                                                                                                                                                                                                                                                                                                                                                                                                                                                                                                                                  | Image Processing                                                                                                                                                                                                                                                                                                                                                                     | WMH quantification                                                                                                                                                                                                                                                                                                                                                                                                                                                                                                             |
|-----------------------------------------|---------------------------------------------------------------------------------------------------------------------------------------------------------------------------------------------------------------------------------------------------------------|--------------------------------------------------------------------------------------------------------------------------------------------------------------------------------------------------------------------------------------------------------------------------------------------------------------------------------------------------------------------------------------------------------------------------------------------------------------------------------------------------------------------------------------------------------------------------------------------------------------------------------------------------------------------------------------------------------------------------------------------------------------------------------------------------------------------------------------------------------------------|--------------------------------------------------------------------------------------------------------------------------------------------------------------------------------------------------------------------------------------------------------------------------------------------------------------------------------------------------------------------------------------|--------------------------------------------------------------------------------------------------------------------------------------------------------------------------------------------------------------------------------------------------------------------------------------------------------------------------------------------------------------------------------------------------------------------------------------------------------------------------------------------------------------------------------|
|                                         | Electric Medical Systems                                                                                                                                                                                                                                      | with no interslice gap. Total intracranial volume (head size) was measured from T1-weighted spin echo sagittal images, each set consisting of 32 contiguous 5 mm thick slices with no interslice gap.                                                                                                                                                                                                                                                                                                                                                                                                                                                                                                                                                                                                                                                              | multi-slice FLAIR sequence into voxels assigned to one of three categories: brain, CSF, or leukoaraiosis.                                                                                                                                                                                                                                                                            | histories or biological relationships. Total leukoaraiosis volumes were determined from axial FLAIR images.                                                                                                                                                                                                                                                                                                                                                                                                                    |
| LBC1936 <sup>36</sup>                   | 1.5 T HDx MRI scanner from General Electric Medical Systems                                                                                                                                                                                                   | T1-w coronal and T2-W, FLAIR, and T2*-weighted axial whole brain images                                                                                                                                                                                                                                                                                                                                                                                                                                                                                                                                                                                                                                                                                                                                                                                            | A semi-automatic computational program written specifically for the project, MCMxxxVI, a multispectral color fusion method that combines different pairs of sequences in red-green color space and performs minimum variance quantization to highlight different tissues.                                                                                                            | WMH were measured in the cerebral hemispheres, cerebellum and brainstem. Intracranial volume, brain and WMH volume were extracted and manually corrected as necessary to remove false positive lesions in the insular cortex, cingulate gyrus, anterior temporal cortex, and around the floor of the third ventricle, and correct false negatives ( <a href="http://www.bric.ed.ac.uk/research/imageanalysis.html">http://www.bric.ed.ac.uk/research/imageanalysis.html</a> ). All focal stroke lesions were manually removed. |
| OATS and BRIDGET-OATS                   | New South Wales study site: Philips 1.5T Gyroscan scanner was initially used, and later replaced with a Philips 3T Achieva Quasar Dual scanner. Victoria study site: Siemens 1.5T Magnetom Avanto scanner. Queensland study site: Siemens 1.5T Sonata scanner | T1-weighted MRI – T1-weighted images acquired from 1.5T scanners in all three centres: in-plane resolution 1 × 1 mm with slice thickness of 1.5 mm, contiguous slices, TR (repetition time) = 1530 ms, TE (echo time) = 3.24 ms, TI (inversion time) = 780 ms, and flip angle = 8°. Scanning parameters for T1-weighted MRI acquired on the 3T scanner in New South Wales: TR = 6.39 ms, TE = 2.9 ms, spatial resolution = 1 × 1 × 1 mm <sup>3</sup> . T2-weighted FLAIR – FLAIR images acquired from 1.5T scanners in all three centres: TR = 10000 ms, TE = 120 ms, TI = 2800 ms, slice thickness = 3.5 mm, and in-plane resolution = 0.898 × 0.898 mm <sup>2</sup> . The scanning parameters of the 3T scanner at New South Wales: TR = 10000 ms, TE = 110 ms, TI = 2800 ms, slice thickness = 3.5 mm and in-plane resolution = 0.898 × 0.898 mm <sup>2</sup> . | Both image preprocessing and the quantification of WMH were done automatically by using UBO Detection. <sup>33</sup> Briefly, the preprocessing included registering T2-FLAIR to corresponding T1 image, tissue segmentation using SPM12, warping to s sample-specific DARTEL space, non-brain tissue removal, bias field correction, and segmentation using FSL FAST. <sup>37</sup> | Briefly, for WMH extraction, a k-nearest neighbour (kNN)-based classifier was applied to FAST-segmented clusters to classify the clusters into WMH or non-WMH through considering intensity, anatomical location, and cluster size features. The segmented WMH were visually checked for segmentation accuracy. White matter hyperintensities (WMH) volumes were calculated using UBO Detector                                                                                                                                 |
| RSIII and RSI-III (BBMRI) <sup>19</sup> | 1.5 T scanner (GE Signa Excite) using                                                                                                                                                                                                                         | Structural imaging is performed with T1-weighted (T1w), proton density-                                                                                                                                                                                                                                                                                                                                                                                                                                                                                                                                                                                                                                                                                                                                                                                            | The combination of different MR contrasts provided by acquired                                                                                                                                                                                                                                                                                                                       | WMH volume was quantified using two fully automated methods, which was described previously in more detail. Either the HASTE, PD                                                                                                                                                                                                                                                                                                                                                                                               |

| Study                                           | MRI technology                                                                                                             | Scanning Protocol                                                                                                                                                                                                                      | Image Processing                                                                                                                                                                                                           | WMH quantification                                                                                                                                                                                                                                                                                                                                                                                                                                         |
|-------------------------------------------------|----------------------------------------------------------------------------------------------------------------------------|----------------------------------------------------------------------------------------------------------------------------------------------------------------------------------------------------------------------------------------|----------------------------------------------------------------------------------------------------------------------------------------------------------------------------------------------------------------------------|------------------------------------------------------------------------------------------------------------------------------------------------------------------------------------------------------------------------------------------------------------------------------------------------------------------------------------------------------------------------------------------------------------------------------------------------------------|
|                                                 | an 8-channel head coil                                                                                                     | weighted (PDw) and fluid-attenuated inversion recovery (FLAIR) sequences.                                                                                                                                                              | sequences can be used for automated brain tissue and white matter lesion segmentation. For this purpose, the T1w scan is acquired in 3D at high in-plane resolution and with thin slices (voxel size <1 mm <sup>3</sup> ). | and T2 sequences were used, or the FLAIR, T1 and PD sequences. Briefly, cerebrospinal fluid (CSF), gray matter (GM) and white matter (WM) are segmented by an atlas-based k-nearest neighbor classifier on multi-modal magnetic resonance imaging data. This classifier is trained by registering brain atlases to the subject. The resulting GM segmentation is used to automatically find a WMH threshold in a fluid-attenuated inversion recovery scan. |
| Rhineland Study                                 | Siemens 3 Tesla Prisma MRI scanners, equipped with an 80 mT/m gradient system and a 64-channel phased-array head-neck coil | The protocol included a 3D T1-weighted Multi-Echo Magnetisation Prepared RApid Gradient-Echo (MEMPRAGE) sequence (0.8 mm isotropic); a 3D T2 Turbo-Spin-Echo (TSE) sequence (0.8 mm isotropic); a 3D FLAIR sequence (1.0 mm isotropic) | WMH were outlined using an in-house developed pipeline based on DeepMedic <sup>38</sup> , which utilizes image information from T1-weighted, T2-weighted, and FLAIR sequences.                                             | WMH were defined as hyperintense signal abnormalities in the white matter tracts on FLAIR and/or T2-weighted images.                                                                                                                                                                                                                                                                                                                                       |
| SHIP-TREND and BRIDGET-SHIP-TREND <sup>39</sup> | 1.5-T MR imager from Siemens Medical systems                                                                               | A series of T1, MP-RAGE/ axial plane with the resolution of 1.0 x 1.0 x 1.0 mm <sup>3</sup> and T2 FLAIR / axial plane with the resolution of 0.9 x 0.9 x 3.0mm <sup>3</sup> .                                                         | The FreeSurfer 5.1.0 software                                                                                                                                                                                              | WMH quantification was based on the following sequences: T1, MP-RAGE/ axial plane, TR=1900 ms, TE=3.4 ms, Flip angle=15°, resolution of 1.0 x 1.0 x 1.0mm <sup>3</sup> .                                                                                                                                                                                                                                                                                   |

Abbreviations: Double spin echo (DSE). Fluid-attenuated inversion recovery (FLAIR). Proton-density (PD). Cerebrospinal fluid (CSF). White matter (WM). Grey matter (GM). Total (intra)cranial volume (TIV/TCV)



**SUPPLEMENTARY DATA III. DNA METHYLATION DATA COLLECTION AND ASSOCIATION STUDY IN PARTICIPATING STUDIES**

| Study   | Technology    | Tissue source              | Normalization                                 | QC methods                                                                                                                             | Experimental/<br>Biological covariates                                                                                                                                     | Covariate Assessment                                                                                                                                                                                                                    | Technical Covariates          | Methods of Adjustment for Covariates                                                                                                                                                            |
|---------|---------------|----------------------------|-----------------------------------------------|----------------------------------------------------------------------------------------------------------------------------------------|----------------------------------------------------------------------------------------------------------------------------------------------------------------------------|-----------------------------------------------------------------------------------------------------------------------------------------------------------------------------------------------------------------------------------------|-------------------------------|-------------------------------------------------------------------------------------------------------------------------------------------------------------------------------------------------|
| ADNI    | Illumina 850K | Whole blood                | BMIQ                                          | removed probes with a low detection rate (P>0.01 for >5% of samples)<br>removed samples with low call rate (P<0.01 for <95% of probes) | Model 1: ICV, age, sex, WBC, study site, visit, time between MRI and DNAm visits, early MCI status, population structure (surrogates);<br>Model 2: + Smoking, BMI SBP, DBP | Smoking status was coded as “Yes” or “No”.<br>Systolic and diastolic blood pressure was measured at the MRI visit.                                                                                                                      | chip ID, chip Position        | Linear mixed models of DNAm~WMH burden adjusted for biological and technical covariates. Technical covariates as random effects.                                                                |
| ARIC    | Illumina 450K | Blood leukocytes           | BMIQ                                          | removed probes with a low detection rate (P>0.01 for >5% of samples)<br>removed samples with low call rate (P<0.01 for <99% of probes) | In each ancestry,<br>Model 1: age, sex, WBC, technical covariates, population structure (surrogates);<br>Model 2: + Smoking, BMI, SBP, DBP                                 | Smoking status was obtained using an interviewer-administered questionnaire and was classified as current, former, or never.<br>Blood pressure was assessed at example 2 and 3, the average value of two visits was used in this study. | Chip ID, Chip Row, Chip Plate | Linear mixed models of DNAm~WMH burden adjusted for biological and technical covariates. Technical covariates as random effects.                                                                |
| BRIDGET | MCC-Seq       | Buffy coat and whole blood | Refer text above for MCC-Seq data processing. |                                                                                                                                        | Age, sex, cohort site, and sample non-independence (relatedness, population structure or hidden confounding factors)                                                       | NA                                                                                                                                                                                                                                      | NA                            | Generalised linear mixed model of Methylation score~extreme-SVD adjusted for age, sex, cohort site and sample non-independence. We used PQLSeq software for association analysis. <sup>40</sup> |

| Study  | Technology    | Tissue source    | Normalization      | QC methods                                                                                                                                                                                                                                                                                                                                                                                                                                                                     | Experimental/<br>Biological covariates                                                                                           | Covariate Assessment                                                                                                                                                                                                                                                                                                                                                   | Technical Covariates   | Methods of Adjustment for Covariates                                                                                                                                                                                        |
|--------|---------------|------------------|--------------------|--------------------------------------------------------------------------------------------------------------------------------------------------------------------------------------------------------------------------------------------------------------------------------------------------------------------------------------------------------------------------------------------------------------------------------------------------------------------------------|----------------------------------------------------------------------------------------------------------------------------------|------------------------------------------------------------------------------------------------------------------------------------------------------------------------------------------------------------------------------------------------------------------------------------------------------------------------------------------------------------------------|------------------------|-----------------------------------------------------------------------------------------------------------------------------------------------------------------------------------------------------------------------------|
| CARDIA | Illumina 850K | Whole blood      | RCP                | <ul style="list-style-type: none"> <li>- excluded 6,209 CpGs with a detection rate &lt;95%</li> <li>- excluded 87 samples with the percentage of low-quality methylation measurements &gt;5%</li> <li>- extremely low intensity of bisulfite conversion probes (less than mean intensity - 3 × standard deviation of the intensity across samples).</li> </ul>                                                                                                                 | Model 1: age, sex, race, WBC, technical covariates, population structure (surrogates);<br>Model 2: + Smoking, BMI, SBP, DBP      | <ul style="list-style-type: none"> <li>- Smoking status was coded as “never”, “ex-smoker”, and “current smoker” based on a self-administered questionnaire.</li> <li>- Systolic and diastolic blood pressure in mmHg measured at the same examination as the DNA sampling.</li> </ul>                                                                                  | chip ID, chip position | Linear mixed models of DNAm~WMH burden adjusted for biological and technical covariates. Technical covariates as random effects.                                                                                            |
| CHS    | Illumina 450K | Blood leukocytes | SWAN               | <ul style="list-style-type: none"> <li>- excluded samples with a proportion of probes falling detection of greater than 0.5%</li> <li>- low median intensities of below 10.5 (log2) across the methylated and unmethylated channels</li> <li>- QC probes falling greater than 3 standard deviation from the mean</li> <li>- with sex-check mismatches</li> <li>- failed concordance with prior genotyping or &gt; 0.5% of probes with a detection p-value &gt; 0.01</li> </ul> | Model 1: age, sex, 4 genetic PCs, batch, WBC estimates, race, technical covariates;<br>Model 2: Model 1 + Smoking, BMI, SBP, DBP | <ul style="list-style-type: none"> <li>- Smoking was assessed with a standard questionnaire during in-person interview at the time of blood assessment for methylation. Smoking status was categorized into never, former or current smoker.</li> <li>- Systolic and diastolic blood pressure in mmHg measured at the same examination as the DNA sampling.</li> </ul> | chip ID, chip position | Linear mixed models of DNAm~WMH burden adjusted for biological and technical covariates. Technical covariates as random effects.                                                                                            |
| FHS    | Illumina 450K | Whole blood      | DASEN (wateRmelon) | <ul style="list-style-type: none"> <li>- Samples were excluded if outliers in multidimensional scaling (MDS) analysis, high missing rate (&gt;1%), poor matching to SNP genotype</li> <li>- Probes were excluded if high missing rate (&gt;20%), mapped to multiple locations, had SNP (MAF&gt;5% in EUR 1000G) at CpG site or ≤10 bp of Single Base Extension.</li> </ul>                                                                                                     | Model 1: age, sex, WBC, technical covariates, population structure (surrogates);<br>Model 2: + Smoking, BMI, SBP, DBP            | <ul style="list-style-type: none"> <li>- Current smoking is defined as regularly smoking in the past year which was self-reported at each examination. Using examination 8 and previous examination data, participants were classified as current smoker, ex-smoker, never smoker.</li> </ul>                                                                          | chip ID, chip position | Linear mixed models of DNAm~WMH burden adjusted for biological and technical covariates. Family structure is also adjusted as a random intercept effect, its variance-covariance matrix proportional to the kinship matrix. |

| Study                     | Technology    | Tissue source    | Normalization      | QC methods                                                                                                                                                                                                                                                          | Experimental/<br>Biological covariates                                                                                                                                                 | Covariate Assessment                                                                                                                                                                                                                                                                                                                                                                                                            | Technical Covariates                   | Methods of Adjustment for Covariates                                                                                                                                    |
|---------------------------|---------------|------------------|--------------------|---------------------------------------------------------------------------------------------------------------------------------------------------------------------------------------------------------------------------------------------------------------------|----------------------------------------------------------------------------------------------------------------------------------------------------------------------------------------|---------------------------------------------------------------------------------------------------------------------------------------------------------------------------------------------------------------------------------------------------------------------------------------------------------------------------------------------------------------------------------------------------------------------------------|----------------------------------------|-------------------------------------------------------------------------------------------------------------------------------------------------------------------------|
| GENOA                     | Illumina 27K  | Blood leukocytes | SWAN               | - Remove probe if >5% of samples have a detection p-value of >0.01;<br>- Remove sample if >5% of probes have a detection p-value of >0.01;                                                                                                                          | Model 1: age, sex, total intracranial volume, 41 genetic PCs, WBC, technical covariates, familial relationship;<br>Model 2: + smoking, BMI, SBP, DBP                                   | - Smoking status: current smoker (smokes currently or quit smoking within the past year), ex-smoker (formerly smoked, but quit more than 1 year ago), and never-smoker (smoked less than 100 cigarettes in his/her entire life).<br>- Blood Pressure: sitting systolic and diastolic blood pressure in mmHg were measured three times with a random zero sphygmomanometer. The average of the last two measurement was used.    | plate, row, column                     | Linear mixed models of DNAm~WMH burden adjusted for biological and technical covariates. Technical covariates and familial relationship were treated as random effects. |
| LBC1936                   | Illumina 450K | Whole blood      | minfi              | Remove probes with - a low detection rate (P>0.01 for >5% of samples) - low quality (manual inspection)<br>Remove samples with - low call rate (P<0.01 for <95% of probes)<br>- a poor match between genotypes and SNP control probes<br>- incorrect predicted sex. | Model 1: age + Sex + ICV+ 4 genetic PCs + WBC + technical covariates, Model 2: BMI + current smoking + dbp3sit + sbp3sit + age + Sex + ICV+ 4 genetic PCs + WBC + technical covariates | - Smoking status was self-reported in three categories: current smoker, ex-smoker, never smoker.<br>- Blood Pressure: dbp3sit + sbp3sit (3rd reading)                                                                                                                                                                                                                                                                           | Chip, sample plate, hybridization date | Linear mixed models of DNAm~WMH burden adjusted for biological and technical covariates.                                                                                |
| OATS                      | Illumina 450K | Blood leukocytes | SWAN               | a) Exclude samples with p-value <0.01 for <95% of probes<br>b) Exclude probes with p-value >0.01 in >5% of samples                                                                                                                                                  | Model 1: age, sex, site, population structure (first 2 PCs), WBC;<br>Model 2: + smoking, BMI, SBP, DBP                                                                                 | - Information on cigarette smoking was obtained in wave 1 using an interviewer-administered questionnaire and was classified as current, former, or never.<br>- BMI was calculated as weight in kilograms/(height in meters) <sup>2</sup> from height and weight measurements obtained at wave 1.<br>- Seated blood pressure was assessed in wave 1, the average value of three individual measurements was used in this study. | Site                                   | Generalised estimating equations of DNAm~WMH burden adjusted for biological covariates. Family being a random effect.                                                   |
| RSIII and RSI-III (BBMRI) | Illumina 450K | Whole blood      | DASEN (watermelon) | - Excluded samples with incomplete bisulfite treatment, a low detection rate (<99%), or gender mismatches.                                                                                                                                                          | Model 1: ICV, age, sex, array number, array position, WBC                                                                                                                              | - Smoking status: Smoking status was coded as self-reported “never smoker”, “ever smoker”, and “current                                                                                                                                                                                                                                                                                                                         | Array number, array position.          | Linear mixed models of DNAm~WMH burden adjusted for                                                                                                                     |

| Study           | Technology    | Tissue source | Normalization | QC methods                                                                                                                                                                                                                                                                                                                                                                | Experimental/<br>Biological covariates                                                           | Covariate Assessment                                                                                                                                                                                                                                 | Technical Covariates                                     | Methods of Adjustment for Covariates                                                     |
|-----------------|---------------|---------------|---------------|---------------------------------------------------------------------------------------------------------------------------------------------------------------------------------------------------------------------------------------------------------------------------------------------------------------------------------------------------------------------------|--------------------------------------------------------------------------------------------------|------------------------------------------------------------------------------------------------------------------------------------------------------------------------------------------------------------------------------------------------------|----------------------------------------------------------|------------------------------------------------------------------------------------------|
|                 |               |               |               | - Excluded probes with a detection p-value > 0.01 in > 1% samples                                                                                                                                                                                                                                                                                                         | counts.<br>Model 2: model 1 + smoking, BMI, SBP, DBP                                             | smoker" based on a home interview.<br>- Blood Pressure: Blood pressure was measured twice at the center visit, and the average of the two measurements was used.                                                                                     |                                                          | biological and technical covariates. Technical covariates as random effects.             |
| Rhineland Study | Illumina 850K | buffy coat    | minfi         | Remove probes with a low detection rate (detection p-value > 0.01 for > 1% of samples)<br>Remove samples with low median intensities of below 10.5 (log2) across the methylated and unmethylated channels<br>- a low call rate (detection p-value > 0.01 for < 99% of probes)<br>- sex mismatch                                                                           | Model 1: age, sex, ICV, WBC subtypes, technical covariates;<br>Model 2: + smoking, BMI, SBP, DBP | Smoking status was coded as "Yes" or "No". Body mass index was computed as weight in kilogram divided by squared height in meter from the anthropometric exams at the visit.<br>Systolic and diastolic blood pressure was measured at the MRI visit. | chip ID, chip position, first 5 PCs of the control probe | Linear mixed models of DNAm~WMH burden adjusted for biological and technical covariates. |
| SHIP-TREND      | Illumina 850K | Whole blood   | CPACOR        | - probes with detection p-value $\geq 1E-16$ were set to missing<br>- arrays with call rates $\leq 0.95$ were excluded<br>- arrays with observed technical problems during steps like bisulfite conversion, hybridization or extension, as well as arrays with mismatch between sex of the proband and sex determined by the chr X and Y probe intensities were excluded. | Model 1: ICV, age, sex, WBC subtypes, technical covariates;<br>Model 2: + smoking, BMI, SBP, DBP | Smoking status: current smoker determined by questionnaire<br>- Blood Pressure: measured (mean of 2nd and 3rd measurement)                                                                                                                           | First 6 control probes-based PCs                         | linear regression adjusted for all covariates listed                                     |

#### SUPPLEMENTARY DATA IV. GENE EXPRESSION DATA DESCRIPTION

| <b>Study</b>        | <b>Technology</b>                        | <b>Tissue source</b> | <b>Normalization</b>                                                                                                                                                                                                                                                                                                   | <b>GEO accession ID</b> |
|---------------------|------------------------------------------|----------------------|------------------------------------------------------------------------------------------------------------------------------------------------------------------------------------------------------------------------------------------------------------------------------------------------------------------------|-------------------------|
| FHS <sup>41</sup>   | Affymetrix Human Exon Array ST 1.0       | Whole blood          | The raw data were quantile-normalized and log <sub>2</sub> transformed, followed by summarization using Robust Multi-array Average. The percentages of each imputed cell type were then normalized, where the negative predicted values were set to 0 and the sum of the percentages for all cell types were set 100%. |                         |
| RS <sup>42,43</sup> | Illumina HumanHT12v4 Expression Beadchip | Whole blood          | Quantile-normalized to the median distribution and subsequently log <sub>2</sub> -transformed. The probe and sample means were centered to zero and Z-transformed.                                                                                                                                                     | GSE33828                |

## SUPPLEMENTARY FIGURES

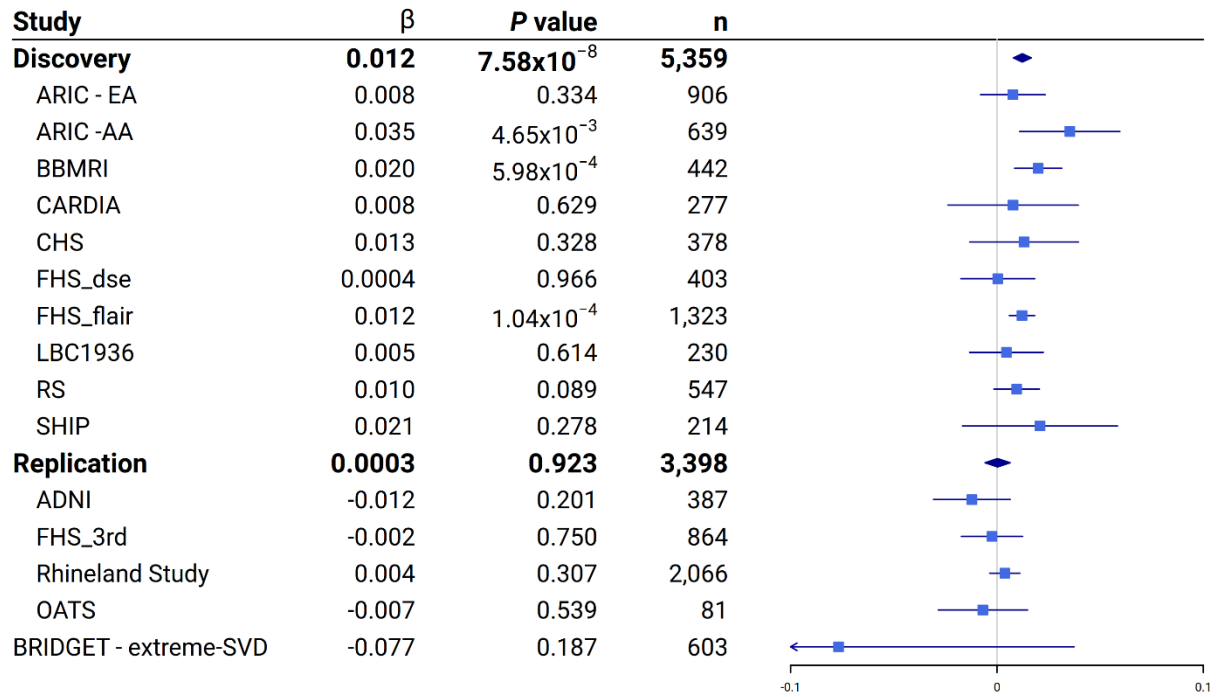

**Supplementary Figure 1 Forest plot of cg24202936 effect on WMH burden.**

Beta estimates from the linear mixed effect model for cg24202936 in the meta-analysis and individual studies were drawn with their 95% confidence intervals. The BRIDGET study derived beta estimate and P value from a logistic regression model. **Abbreviations:** AA = African ancestry; ADNI = Alzheimer's Disease Neuroimaging Initiative; ARIC = Atherosclerosis Risk in Communities Study; BBMRI = Biobanking and BioMolecular resources Research Infrastructure ; BRIDGET = the BRain Imaging, cognition, Dementia and next generation GEnomics: a Transdisciplinary approach to search for risk and protective factors of neurodegenerative disease consortium; CHS = Cardiovascular Health Study; CARDIA = Coronary Artery Risk Development in Young Adults; EA = European ancestry; FHS\_dse = Framingham Heart Study Offspring double spin-echo sequence study; FHS\_flair = FHS Offspring fluid-attenuated inversion recovery study; FHS\_3<sup>rd</sup>: FHS 3rd generation study; LBC1936 = Lothian Birth Cohort 1936; RS = Rotterdam Study; SHIP = Study of Health in Pomerania; OATS = Older Australian Twin Study.

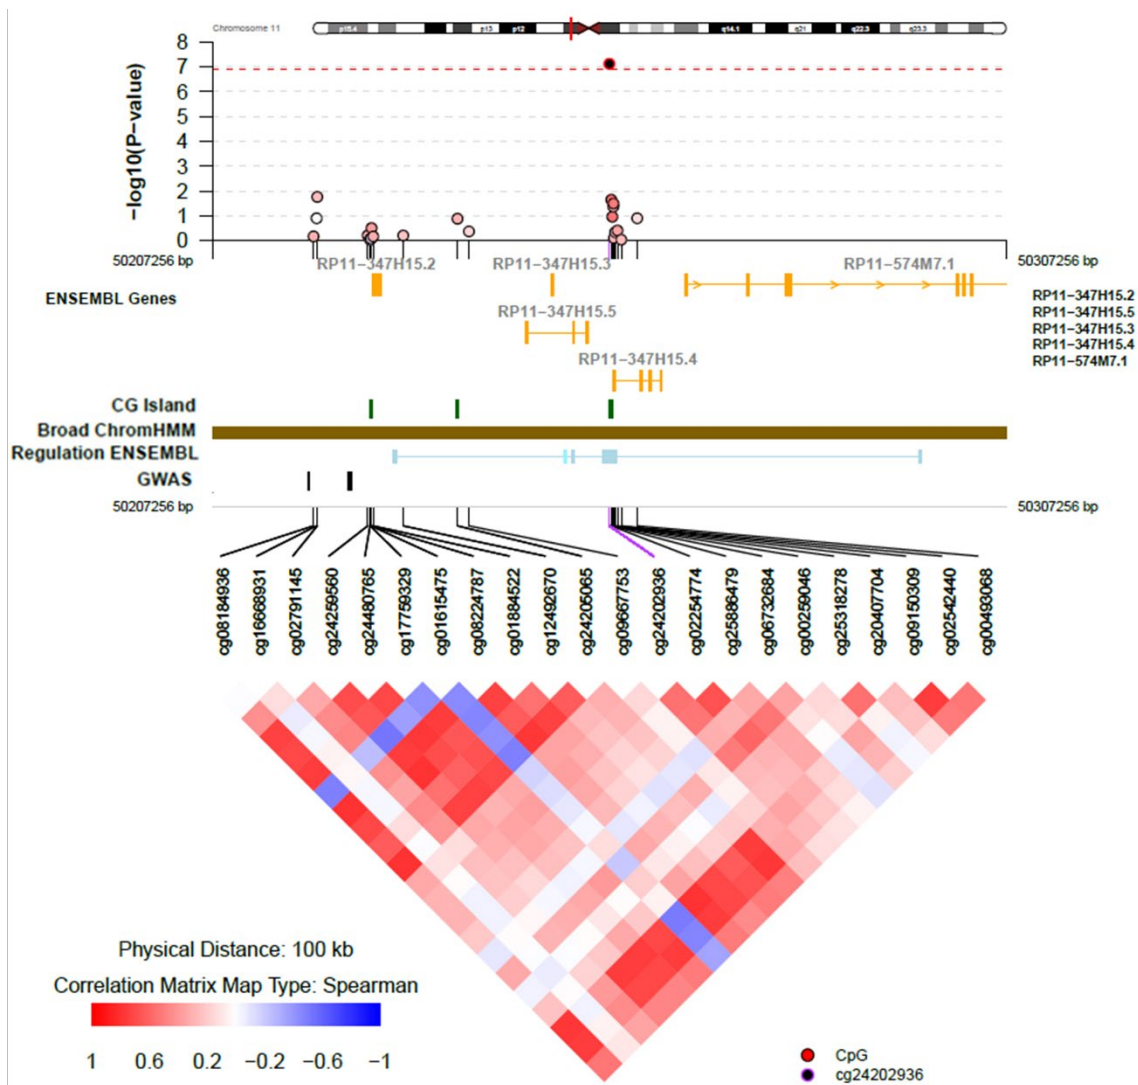

**Supplementary Figure 2 Regional plot for cg24202936 ( $\pm 50$  kb).**

Red dashed line indicated the significance threshold ( $1.2 \times 10^{-7}$ ). Along with x-axis of chromosomal position,  $-\log_{10}(P\text{ value})$  is plotted on y-axis for each CpG. Correlations among CpGs were calculated in ARIC study (906 European and 639 African descents). Genomic positions were annotated using CpG Islands, ENCODE histone modification (“Broad ChromHMM”), ENSEMBL Genes (“Regulation ENSEMBL”), and genome-wide association study (GWAS) findings.

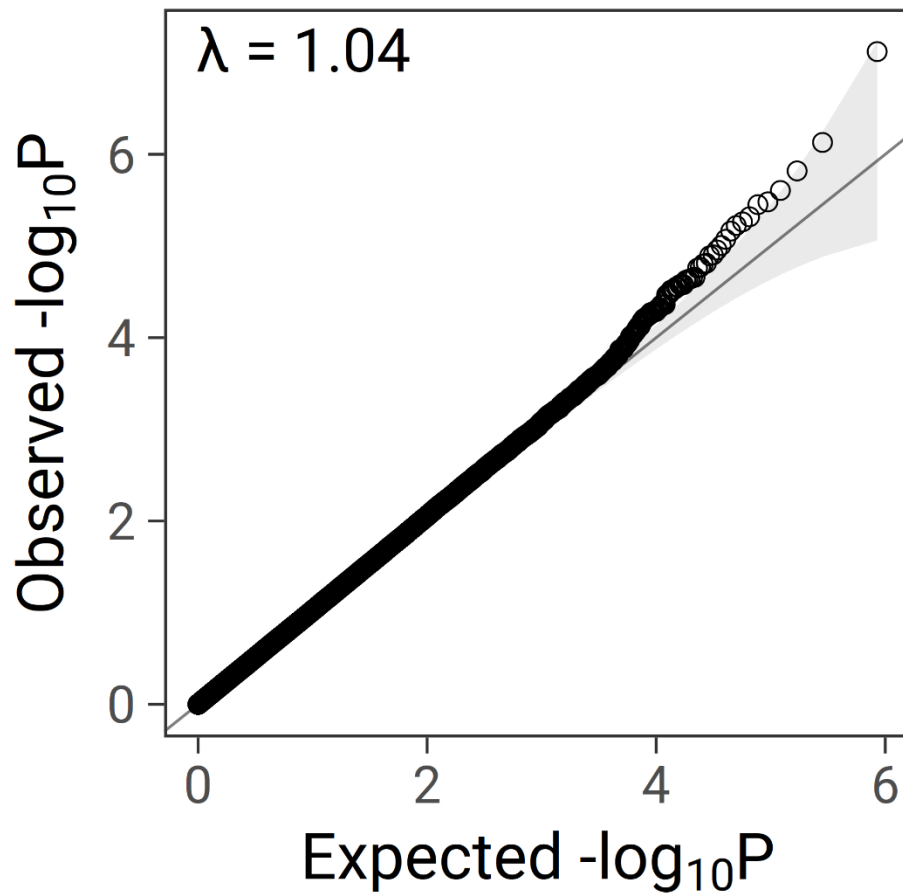

**Supplementary Figure 3** QQ plot in methylome-wide association  $P$  values for WMH burden.

Observed  $-\log_{10}(P \text{ value})$  are plotted against expected values.  $\lambda$  indicates the genomic inflation factor.



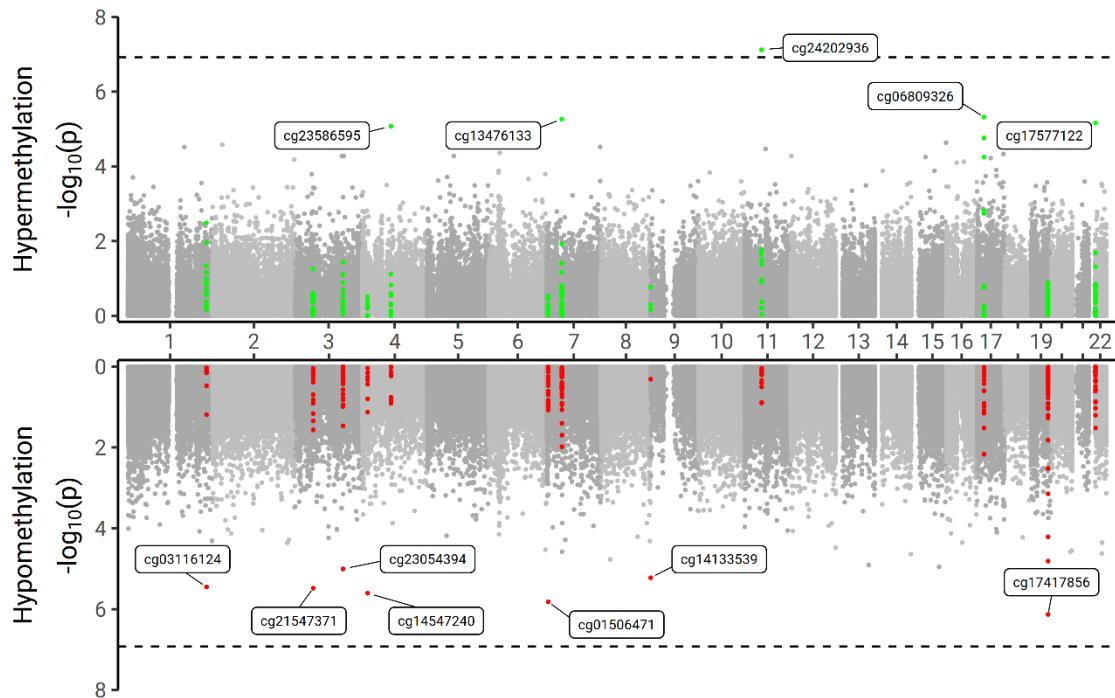

**Supplementary Figure 4 Miami plot of methylome-wide associations in WMH burden.**

Associations ( $-\log_{10}(P \text{ value})$ , y-axis) between increased DNAm level (hypermethylation) and WMH burden (top); between decreased DNAm level (hypomethylation) and WMH burden (bottom) are plotted against DNAm locations (x-axis). The dashed line indicates the Bonferroni threshold ( $1.2 \times 10^{-7}$ ) for epigenome-wide significance. Target CpGs with a  $P$  value smaller than the suggestive significance threshold ( $1.0 \times 10^{-5}$ ) are labelled with probe name. Single CpGs within  $\pm 50$  kb are highlighted in green (top) and red (bottom).

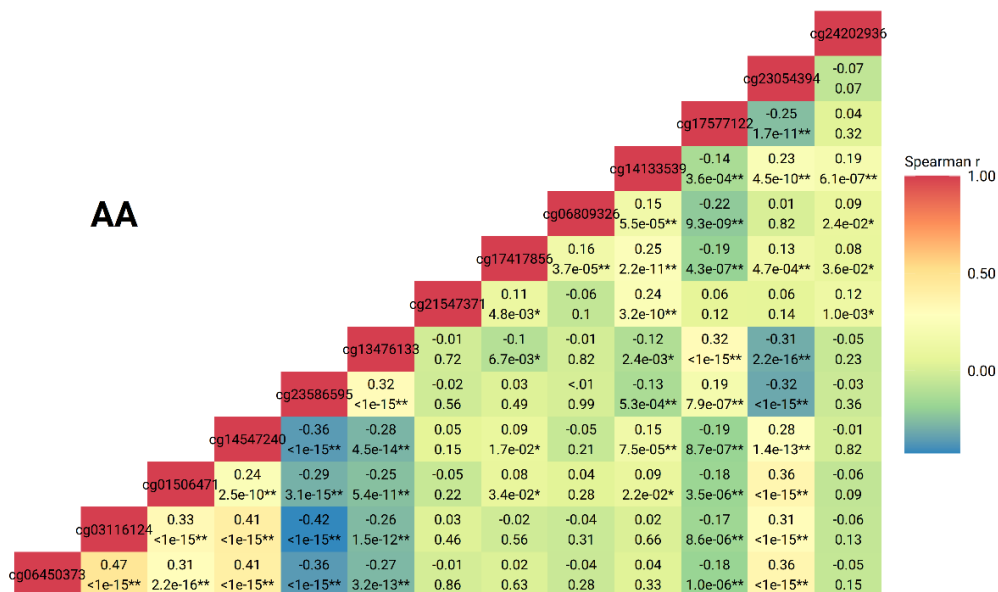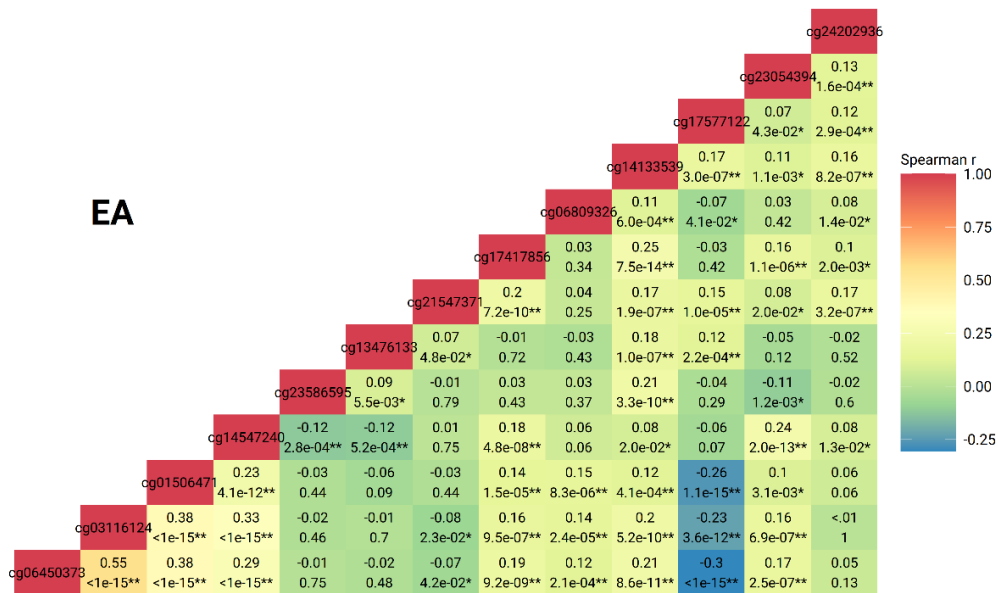

**Supplementary Figure 5 Spearman correlation (P value) among target probes in ARIC subjects of European ancestry (ARIC-EA) and of African ancestry (ARIC-AA).**

The color scale corresponds to strength and direction of correlation, where negative correlations are blue and positive correlations are red (see legend). Each box represents Spearman correlation coefficient between CpG in the row and CpG in the column with P value below. \*Spearman r with P value <0.05; \*\*<math>7.58 \times 10^{-4}</math> (0.05/66 CpG pairs).

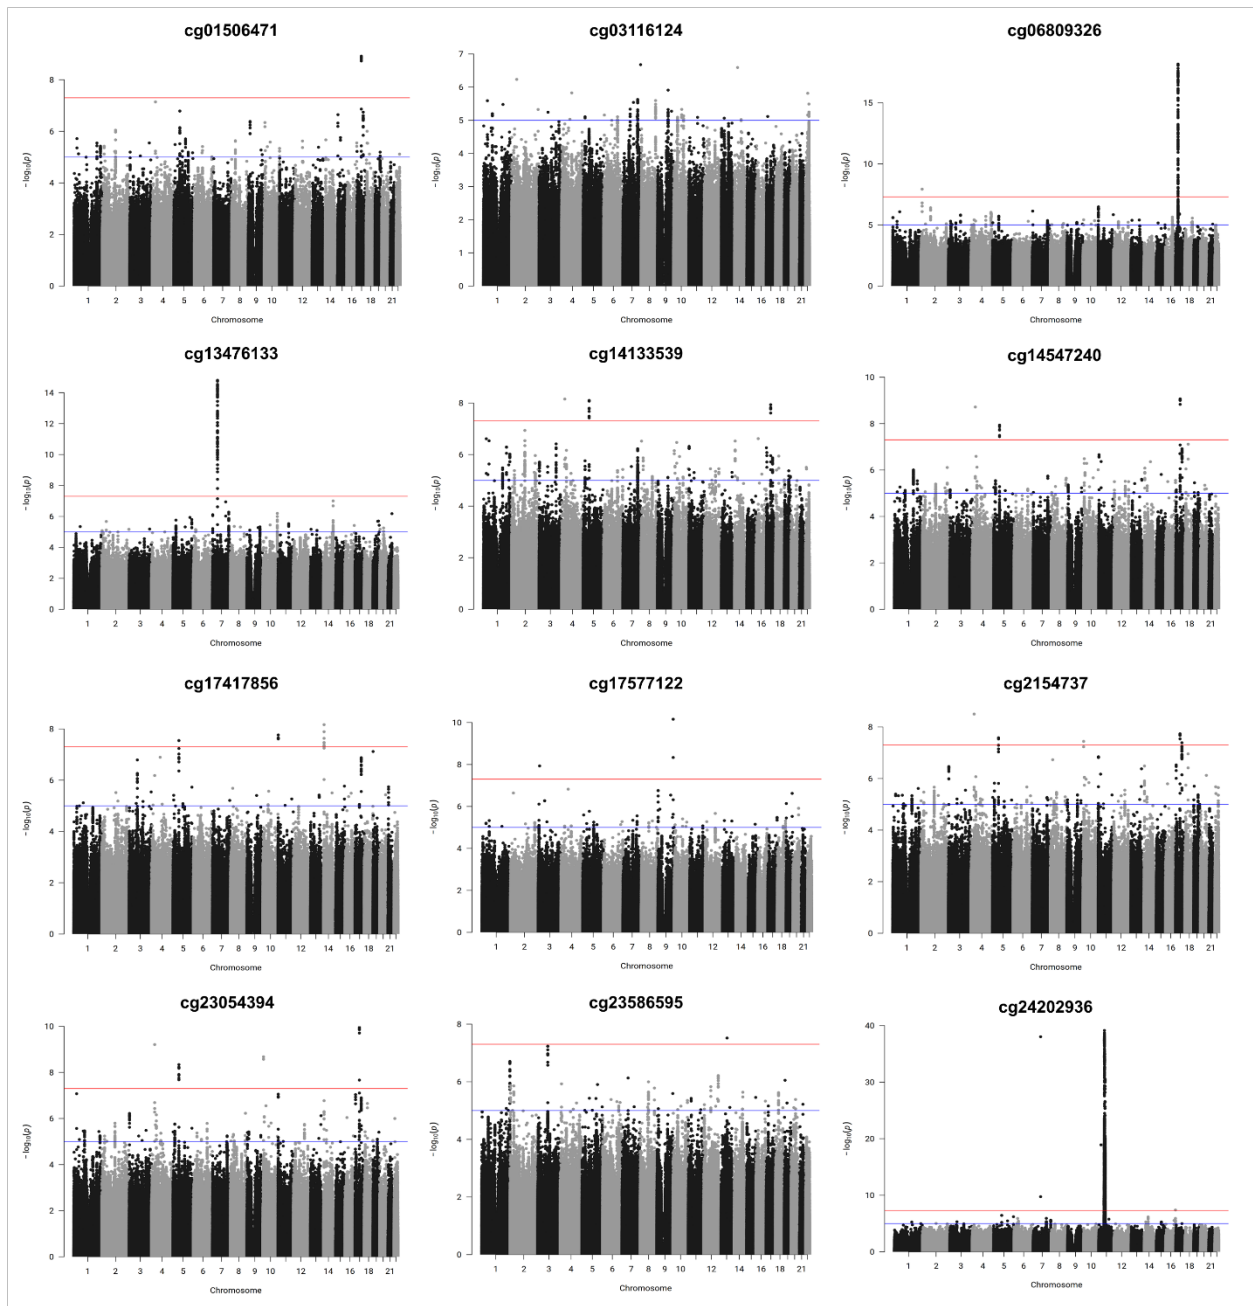

**Supplementary Figure 6** Manhattan plots of genome-wide associations for target CpGs.

SNPs with imputation quality ( $R^2 < 0.3$ ) or minor allele frequency  $< 0.01$  are excluded. Red and blue lines indicate the genome-wide significance threshold ( $P$  value  $< 5 \times 10^{-8}$ ) and suggestive threshold ( $P$  value  $< 1 \times 10^{-5}$ ), respectively. Dots are plotted by  $-\log_{10}(P$  value) on y-axis along with their chromosomal positions on x-axis.

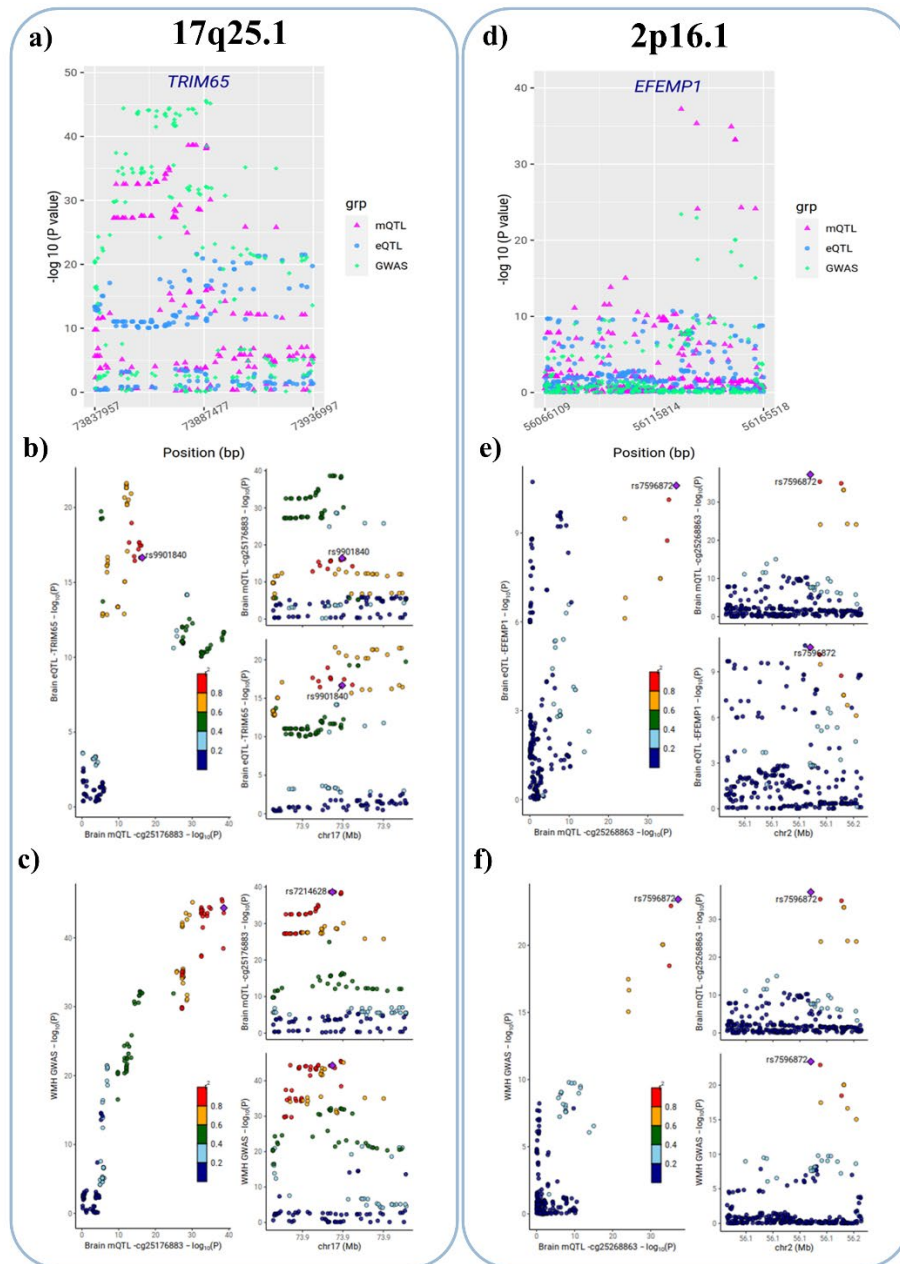

**Supplemental Figure 7 Multiple trait colocalization and LocusCompare plots for the selected GWAS loci.** Left column shows three plots for associations at 17q25.1 (cg25176883 and *TRIM65*) and right column shows three plots for associations at 2p16.1 (cg25268863 and *EFEMP1*). a) and d) are colocalization scatter plots showing brain mQTL (magenta), brain eQTL (cyan), and WMH burden GWAS (neon green) associations against chromosomal position on x-axis. In b) and e), left panels show scattered  $-\log_{10} P$  values of brain mQTL associations on x-axis against  $-\log_{10} P$  values of brain eQTL associations on y-axis; while two mini plots on the right show the mQTL and eQTL associations separately. In c) and f), brain mQTL associations are plotted against the WMH burden GWAS associations on y-axis. LocusCompare plots shown the LD structure among colocalization SNPs in colors, from low (blue) to high LD (red). The sentinel SNP for the cg25176883 and *TRIM65* colocalization locus in Supplementary Table 16, rs34974290, is in LD with the sentinel SNP in plot b) rs9901840 ( $r^2=0.57$ ) and rs7214628 ( $r^2=0.94$ ).

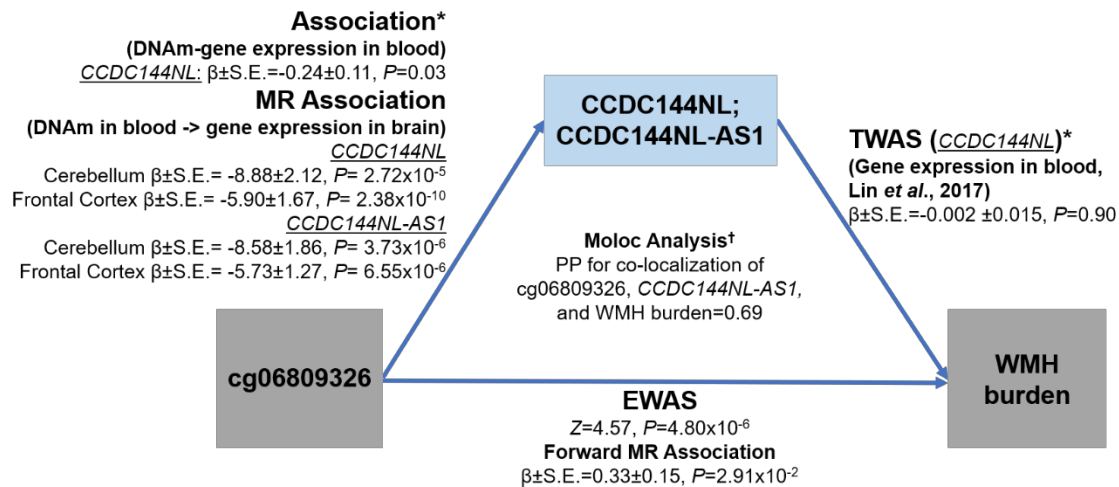

**Supplementary Figure 8 Overview of associations in relation to cg06809326.**

DNAm: DNA methylation, MR: Mendelian randomization, EWAS: epigenome-wide association study, PP: Bayesian posterior probability, WMH: white matter hyperintensities.

\*These studies (FHS and RS) do not include *CCDC144NL-AS1* expression data.

†ROSMAP DLPFC expression quantitative trait loci (eQTL) data does not include *CCDC144NL* data.

## SUPPLEMENTARY TABLES

Supplementary Table 1 Demographic characteristics in participating cohorts

| Study                          | Ancestry | No. Subjects   | Female (n(%)) | Age (mean±S.D.) | Body mass index (kg/m <sup>2</sup> , mean±S.D.) | Hypertension (n(%)) | Current smoking (n(%)) | WMH burden* (median[Q1, Q3]) |                  |
|--------------------------------|----------|----------------|---------------|-----------------|-------------------------------------------------|---------------------|------------------------|------------------------------|------------------|
| <b>Discovery (n=5,715)</b>     |          |                |               |                 |                                                 |                     |                        |                              |                  |
| ARIC                           | EA       | 906            | 519(57.3%)    | 63.1±4.4        | 26.4±4.6                                        | 306(33.8%)          | 162 (17.9%)            | 0.69 [0.69,1.10]             |                  |
|                                | AA       | 639            | 413(64.8%)    | 61.8±4.5        | 29.6±5.4                                        | 412(64.5%)          | 127 (19.9%)            | 0.69 [0.69,1.10]             |                  |
| BBMRI                          | EA       | 442            | 255(57.7%)    | 64.7±5.8        | 27.4±3.9                                        | 279(63.1%)          | 63 (14.2%)             | 1.40 [1.03,1.92]             |                  |
| CARDIA                         | EA, AA   | 277 (167,110)§ | 130(46.9%)    | 53.9±4.1        | 29.1±5.2                                        | 95(34.3%)           | 95 (34.7%)             | 2.74 [2.46, 3.06]            |                  |
| CHS                            | EA, AA   | 378 (189,189)§ | 153(40.5%)    | 74.6±5.4        | 27.5±5.0                                        | 240(63.5%)          | 49 (13.0%)             | 1.10 [0.69, 1.38]            |                  |
| FHS Offspring                  | FLAIR    | EA             | 1,323         | 711(53.7%)      | 66.9±8.7                                        | 28.0±5.0            | 764(57.7%)             | 101 (7.6%)                   | 1.18 [0.79,1.69] |
|                                | DSE      |                | 403           | 230(57.1%)      | 60.6±9.6                                        | 28.1±5.7            | 186(46.2%)             | 61 (15.1%)                   | 0.46 [0.28,0.79] |
| GENOA                          | AA       | 356            | 259(72.8%)    | 66.3±7.19       | 31.0±5.98                                       | 291(81.7%)          | 50 (14.0%)             | 2.10 [1.81, 2.56]            |                  |
| LBC1936                        | EA       | 230            | 107(46.5%)    | 72.1±5.2        | 27.7±4.51                                       | 190(82.6%)          | 13 (5.6%)              | 2.04 [1.33, 2.76]            |                  |
| RS                             | EA       | 547            | 291(53.2%)    | 62.6±7.3        | 27.2±4.1                                        | 229(41.9%)          | 113 (20.7%)            | 1.34 [0.97,1.77]             |                  |
| SHIP-TREND                     | EA       | 214            | 117(54.7%)    | 49.7±13.3       | 27.2±4.1                                        | 84(39.3%)           | 42 (19.6%)             | 0.74 [0.59,0.93]             |                  |
| <b>Replication (n=4,017)</b>   |          |                |               |                 |                                                 |                     |                        |                              |                  |
| ADNI                           | EA       | 387            | 187(48.3%)    | 74.1±7.0        | 27.2±4.7                                        | 274(70.8%)          | 158 (40.8%)            | 1.29 [0.58,2.01]             |                  |
| FHS 3 <sup>rd</sup> Generation | EA       | 864            | 454(52.5%)    | 47.1±7.8        | 27.6±5.1                                        | 145(16.8%)          | 78(9.0%)               | 0.34 [0.18,0.58]             |                  |
| Rhineland Study                | EA       | 2,066          | 1,187(57.5%)  | 54.1±13.9       | 25.5 ±4.1                                       | 735 (35.6%)         | 280(13.6%)             | 0.40 [0.21,0.80]             |                  |
| OATS                           | EA       | 81             | 48(59.3%)     | 70.5±5.5        | 26.9 ±4.8                                       | 58 (72.5%)          | 0 (0%)                 | 8.31 [7.83, 8.85]            |                  |
| BRIDGET                        | EA       | 619            | 379 (61.1%)   | 68.13±13.56     | NA                                              | 426 (67.7%)         | 0 (0%)                 | NA                           |                  |

AA: African ancestry, ADNI: Alzheimer's Disease Neuroimaging Initiative, ARIC: Atherosclerosis Risk in Communities, BBMRI: Biobanking and BioMolecular resources Research Infrastructure, BRIDGET: BRain Imaging, cognition, Dementia and next generation GENomics: a Transdisciplinary approach to search for risk and protective factors of neurodegenerative disease, CARDIA: Coronary Artery Risk Development in Young Adults, CHS: Cardiovascular Health Study, EA: European ancestry, FHS: Framingham Heart Study, FLAIR: Fluid-attenuated Inversion Recovery study, DSE: dual spin-echo study, GENOA: Genetic Epidemiology Network of Arteriopathy, IQR: interquartile range, LBC: Lothian Birth Cohort 1936, OATS: Older Australian Twin Study, RS: Rotterdam Study, and SHIP: Study of Health in Pomerania, S.D.: standard deviation, WMH: white matter hyperintensities, Q1 and Q3 indicate 25th and 75th percentiles.

\*white matter hyperintensities (WMH) burden is defined as log(WMH+1). For BRIDGET study, prevalence of extreme SVD is shown.

§ CHS and CARDIA performed pooled ancestry analyses. The numbers reflect the number of EA and AA, respectively

**Supplementary Table 2 Replications of single CpGs associated with white matter hyperintensities ( $P < 1 \times 10^{-5}$ )**

| CpG        | Chr:Position (hg19) | Nearest Gene          | Discovery Set |       |                       |      |      |                |                |           | First replication set |       |      |           |                |           | Second replication set |            |       | Meta-analysis of Discovery and First Replication Sets |                    |                       |                            |                |           |                 |                |
|------------|---------------------|-----------------------|---------------|-------|-----------------------|------|------|----------------|----------------|-----------|-----------------------|-------|------|-----------|----------------|-----------|------------------------|------------|-------|-------------------------------------------------------|--------------------|-----------------------|----------------------------|----------------|-----------|-----------------|----------------|
|            |                     |                       | N             | Z     | P                     | Q    | FDR  | Direction      | $\chi^2_{Het}$ | $P_{Het}$ | N                     | Z     | P    | Direction | $\chi^2_{Het}$ | $P_{Het}$ | N                      | Beta (SE)  | P     | N                                                     | Z <sub>fixed</sub> | P <sub>fixed</sub>    | Direction                  | $\chi^2_{Het}$ | $P_{Het}$ | P <sub>RE</sub> | I <sup>2</sup> |
| cg24202936 | 11:50257256         | SEPT1<br>N7P11        | 5,359         | 5.38  | 7.58x10 <sup>-8</sup> | 0.03 | 0.04 | +++++?+++<br>+ | 10.76          | 0.29      | 3,398                 | 0.10  | 0.92 | --+       | 3.10           | 0.38      | 603                    | -0.08±0.06 | 0.19  | 8,757                                                 | 4.27               | 1.99E-05              | -<br>+++++?<br>+++++-      | 24.57          | 0.03      | 1.99E-06        | 40.3           |
| cg17417856 | 19:50191637         | PRMT<br>1:AD<br>M5    | 4,917         | -4.95 | 7.42x10 <sup>-7</sup> | 0.15 | 0.28 | --?---?---     | 1.48           | 0.99      | 3,398                 | 1.19  | 0.23 | --+       | 7.73           | 0.05      | 611                    | -0.01±0.04 | 0.84  | 8,315                                                 | -3.04              | 2.34E-03              | ---?---?---<br>---+        | 25.86          | 0.01      | 2.24E-05        | 57.4           |
| cg01506471 | 7:3990479           | SDKI                  | 5,359         | -4.81 | 1.52x10 <sup>-6</sup> | 0.21 | 0.30 | -----?+--      | 7.38           | 0.60      | 3,398                 | -1.06 | 0.29 | ----      | 0.35           | 0.95      | 616                    | -0.01±0.06 | 0.90  | 8,757                                                 | -4.42              | 9.86E-06              | -----?+--<br>----          | 12.43          | 0.49      | 1.38E-05        | 19.4           |
| cg14547240 | 4:15428750          | CIQT<br>NF7           | 5,359         | -4.71 | 2.48x10 <sup>-6</sup> | 0.25 | 0.30 | -----?---      | 6.68           | 0.67      | 3,398                 | -0.04 | 0.97 | +--+      | 0.68           | 0.88      | 619                    | -0.02±0.06 | 0.72  | 8,757                                                 | -3.71              | 2.09E-04              | +-----?---<br>---+         | 15.79          | 0.26      | 5.09E-03        | 48.0           |
| cg21547371 | 3:52869521          | MUST<br>NI            | 5,359         | -4.65 | 3.30x10 <sup>-6</sup> | 0.25 | 0.30 | -----?+--      | 4.27           | 0.89      | 3,398                 | -1.71 | 0.09 | +---      | 0.94           | 0.82      | 616                    | -0.04±0.07 | 0.51  | 8,757                                                 | -4.70              | 2.55E-06              | +-----?--<br>+-----        | 7.64           | 0.87      | 1.77E-05        | 0.0            |
| cg03116124 | 1:231293208         | TRIM6<br>7            | 5,129         | -4.64 | 3.54x10 <sup>-6</sup> | 0.25 | 0.31 | ----?-?----    | 12.19          | 0.14      | 1,332                 | -0.98 | 0.33 | --?-      | 2.66           | 0.26      | 590                    | 0.05±0.06  | 0.39  | 6,461                                                 | -4.57              | 4.78E-06              | -----?---<br>--?-          | 16.38          | 0.13      | 3.77E-06        | 50.8           |
| cg06809326 | 17:20799526         | CCDC<br>144NL<br>-ASI | 5,359         | 4.57  | 4.80x10 <sup>-6</sup> | 0.28 | 0.34 | +++++?+++      | 7.49           | 0.59      | 3,398                 | 0.65  | 0.51 | ++++      | 1.50           | 0.68      | 619                    | 0.08±0.07  | 0.27  | 8,757                                                 | 3.99               | 6.75E-05              | +++++<br>?<br>+++++        | 14.46          | 0.34      | 3.24E-05        | 9.6            |
| cg13476133 | 7:44185646          | GCK                   | 5,359         | 4.55  | 5.46x10 <sup>-6</sup> | 0.28 | 0.36 | +++++?+++<br>+ | 14.26          | 0.11      | 1,332                 | 1.12  | 0.26 | ++?+      | 2.69           | 0.26      | 612                    | 0.18±0.11  | 0.09  | 6,691                                                 | 4.57               | 4.88E-06              | +++++<br>?+++++?<br>+      | 18.00          | 0.12      | 9.40E-05        | 60.7           |
| cg14133539 | 9:104568            | FOXD<br>4             | 4,917         | -4.53 | 5.98x10 <sup>-6</sup> | 0.28 | 0.38 | --?+-?----     | 6.05           | 0.64      | 3,398                 | 0.05  | 0.96 | +--+      | 1.89           | 0.60      | -                      | -          | -     | 8,315                                                 | -3.45              | 5.64E-04              | +--?-+--?<br>---++         | 16.54          | 0.17      | 2.29E-03        | 46.2           |
| cg17577122 | 22:19511967         | CLDN<br>5             | 5,359         | 4.5   | 6.88x10 <sup>-6</sup> | 0.29 | 0.40 | +++++?+--+     | 5.36           | 0.80      | 1,332                 | 0.86  | 0.39 | ++?+      | 0.41           | 0.82      | 618                    | -0.14±0.12 | 0.24  | 6,691                                                 | 4.41               | 1.03E-05              | +++++<br>?+---+?<br>+---+? | 7.29           | 0.84      | 6.67E-05        | 0.0            |
| cg23586595 | 4:84034390          | PLAC<br>8             | 5,359         | 4.45  | 8.45x10 <sup>-6</sup> | 0.32 | 0.43 | +++++?+++<br>+ | 3.77           | 0.93      | 1,332                 | 0.26  | 0.79 | -         | -              | 619       | 0.13±0.08              | 0.09       | 6,691 | 4.10                                                  | 4.07E-05           | -<br>+++++?<br>+++++? | 22.36                      | 0.03           | 6.54E-06  | 62.3            |                |
| cg23054394 | 3:140784675         | SPSB4                 | 5,359         | -4.42 | 9.88x10 <sup>-6</sup> | 0.34 | 0.45 | -----?+--      | 10.11          | 0.34      | 3,398                 | 0.71  | 0.48 | --++      | 2.59           | 0.46      | 606                    | 0.06±0.14  | 0.66  | 8,757                                                 | -3.02              | 2.57E-03              | -----?+--<br>---++         | 23.65          | 0.03      | 4.94E-03        | 60.0           |

**Abbreviations**

AA: African ancestry, Chr: chromosome, EA: European ancestry, FDR: local false discovery rate value, N: number of subjects tested for the CpG, P: P value, Q: Q value, SE: standard error, Z: Z-score,  $\chi^2_{Het}$ : approximated chisq statistics for heterogeneity (Cochrane's Q), and  $P_{Het}$ : Heterogeneity P value. Alzheimer's Disease Neuroimaging Initiative (ADNI), ARIC (Atherosclerosis Risk in Communities) Study, BBMRI (Biobanking and BioMolecular resources Research Infrastructure), BRain Imaging, cognition, Dementia and next generation GENomics: a Transdisciplinary approach to search for risk and protective factors of neurodegenerative disease (BRIDGET) study, CHS (Cardiovascular Health Study), CARDIA (Coronary Artery Risk Development in Young Adults) Study, Framingham Heart Study (FHS) Offspring Study FLAIR (Fluid-attenuated Inversion Recovery), DSE (dual spin-echo) sub-studies, FHS 3rd generation substudy, Genetic Epidemiology Network of Arteriopathy (GENOA), Lothian Birth Cohort 1936 (LBC1936), Rotterdam Study (RS), Study of Health in Pomerania (SHIP), and Older Australian Twin Study (OATS). Z and P<sub>fixed</sub>: fixed-effect based meta-analysis Z score and P value using METAL software<sup>44</sup>; P<sub>RE</sub>: Han and Eskin (2010) random-effect based meta-analysis P value from METASOFT software.<sup>45</sup>

Signs in direction column indicates in the order of ARIC AA, ARIC EA, BBMRI, RS3, LBC1936, CHS, GENOA, CARDIA, SHIP, FHS<sub>dse</sub>, and FHS<sub>flair</sub> for the discovery set; indicate ADNI, FHS<sub>3rd</sub>, Rhineland Study, and OATS for the first replication set; and indicate ADNI, ARIC AA, ARIC EA, BBMRI, RS3, LBC1936, CHS, GENOA, CARDIA, SHIP-Trend, FHS<sub>dse</sub>, FHS<sub>flair</sub>, FHS<sub>3rd</sub>, Rineland study, and OATS for the meta-analysis, respectively.

**Supplementary Table 3 Associations of target CpGs in hypertensive and normotensive subjects**

| CpG        | CHR | MAPINFO   | Nearest Gene                        | Hypertensive |       |                       |             | Normotensive |       |                       |            |
|------------|-----|-----------|-------------------------------------|--------------|-------|-----------------------|-------------|--------------|-------|-----------------------|------------|
|            |     |           |                                     | N            | Z     | P                     | Direction*  | N            | Z     | P                     | Direction* |
| cg24202936 | 11  | 50257256  | <i>SEPTIN7P11</i>                   | 2,785        | 3.65  | 2.58x10 <sup>-4</sup> | +++++?+++   | 2,516        | 2.99  | 2.78x10 <sup>-3</sup> | ++++?++++  |
| cg17417856 | 19  | 50191637  | <i>PRMT1;C19orf76</i>               | 2,506        | -3.99 | 6.76x10 <sup>-5</sup> | --?--?----  | 2,354        | -2.34 | 1.94x10 <sup>-2</sup> | --?--?+++  |
| cg01506471 | 7   | 3990479   | <i>SDK1</i>                         | 2,785        | -2.34 | 1.94x10 <sup>-2</sup> | -+----?+--  | 2,516        | -2.86 | 4.25x10 <sup>-3</sup> | --+?+--+   |
| cg14547240 | 4   | 15428750  | <i>C1QTNF7</i>                      | 2,785        | -2.29 | 2.21x10 <sup>-2</sup> | -----?+--   | 2,516        | -3.22 | 1.31x10 <sup>-3</sup> | ----+?+--  |
| cg21547371 | 3   | 52869521  | <i>MUSTN1</i>                       | 2,785        | -3.74 | 1.85x10 <sup>-4</sup> | ---+--?---- | 2,516        | -2.48 | 1.31x10 <sup>-2</sup> | +----?+--  |
| cg03116124 | 1   | 231293208 | <i>TRIM67</i>                       | 2,595        | -2.30 | 2.14x10 <sup>-2</sup> | ----?+?+--- | 2,516        | -2.83 | 4.71x10 <sup>-3</sup> | +----?+--- |
| cg06809326 | 17  | 20799526  | <i>CCDC144NL;<br/>CCDC144NL-AS1</i> | 2,785        | 2.95  | 3.17x10 <sup>-3</sup> | +-----?--+  | 2,516        | 2.76  | 5.80x10 <sup>-3</sup> | ++++?+++   |
| cg13476133 | 7   | 44185646  | <i>GCK</i>                          | 2,785        | 3.10  | 1.95x10 <sup>-3</sup> | +++++?+++   | 2,516        | 2.71  | 6.84x10 <sup>-3</sup> | +++?+++    |
| cg14133539 | 9   | 104568    | <i>FOXD4</i>                        | 2,506        | -2.66 | 7.75x10 <sup>-3</sup> | --?+?+---   | 2,354        | -0.93 | 3.53x10 <sup>-1</sup> | --?+?+---  |
| cg17577122 | 22  | 19511967  | <i>CLDN5</i>                        | 2,785        | 3.19  | 1.44x10 <sup>-3</sup> | +++--+?+--+ | 2,516        | 2.71  | 6.79x10 <sup>-3</sup> | ++++?+--+  |
| cg23586595 | 4   | 84034390  | <i>PLAC8</i>                        | 2,785        | 2.03  | 4.27x10 <sup>-2</sup> | -++++?+--+  | 2,516        | 4.23  | 2.34x10 <sup>-5</sup> | ++++?++++  |
| cg23054394 | 3   | 140784675 | <i>SPSB4</i>                        | 2,785        | -3.50 | 4.72x10 <sup>-4</sup> | -----?+---  | 2,516        | -3.15 | 1.62x10 <sup>-3</sup> | +--+?+---  |

CHR: chromosome, MAPINFO: position in bp (hg19), N: sample size

\* The signs indicate the association directions in Atherosclerosis Risk in Communities (ARIC) African ancestry (AA), ARIC European ancestry (EA), Biobanking and BioMolecular resources Research Infrastructure (BBMRI), Rotterdam study (RS), Lothian Birth Cohort 1936 (LBC1936), Cardiovascular Health Study (CHS), Genetic Epidemiology Network of Arteriopathy (GENOA), Coronary Artery Risk Development In young Adults (CARDIA), Study of Health in Pomerania (SHIP), Framingham Heart study (FHS) DSE (dual spin-echo) and FLAIR (Fluid-attenuated Inversion Recovery) studies, respectively.



**Supplementary Table 4 Associations of target CpGs in subjects of European and African ancestry**

| CpG        | CHR | MAPINFO   | Nearest Gene                        | European Ancestry |       |          |            | African Ancestry |       |          |            |
|------------|-----|-----------|-------------------------------------|-------------------|-------|----------|------------|------------------|-------|----------|------------|
|            |     |           |                                     | N                 | Z     | P        | Direction* | N                | Z     | P        | Direction† |
| cg24202936 | 11  | 50257256  | <i>SEPTIN7P11</i>                   | 4,065             | 4.67  | 3.03E-06 | +++++++    | 639              | 2.83  | 4.66E-03 | +?         |
| cg17417856 | 19  | 50191637  | <i>PRMT1;C19orf76</i>               | 3,623             | -4.27 | 1.92E-05 | -?-----    | 639              | -1.66 | 0.10     | -?         |
| cg01506471 | 7   | 3990479   | <i>SDK1</i>                         | 4,065             | -3.90 | 9.47E-05 | ----+--    | 639              | -1.80 | 0.07     | -?         |
| cg14547240 | 4   | 15428750  | <i>CIQTNF7</i>                      | 4,065             | -4.55 | 5.35E-06 | -----      | 639              | -0.46 | 0.65     | -?         |
| cg21547371 | 3   | 52869521  | <i>MUSTN1</i>                       | 4,065             | -3.54 | 3.97E-04 | ----+--    | 639              | -1.76 | 0.08     | -?         |
| cg03116124 | 1   | 231293208 | <i>TRIM67</i>                       | 3,835             | -3.62 | 2.93E-04 | ---?---    | 639              | -1.37 | 0.17     | -?         |
| cg06809326 | 17  | 20799526  | <i>CCDC144NL;<br/>CCDC144NL-AS1</i> | 4,065             | 4.21  | 2.52E-05 | +++++++    | 639              | 2.61  | 9.01E-03 | +?         |
| cg13476133 | 7   | 44185646  | <i>GCK</i>                          | 4,065             | 4.38  | 1.17E-05 | +++++++    | 639              | 0.05  | 0.96     | +?         |
| cg14133539 | 9   | 104568    | <i>FOXD4</i>                        | 3,623             | -3.18 | 1.47E-03 | -?+---     | 639              | -2.66 | 7.88E-03 | -?         |
| cg17577122 | 22  | 19511967  | <i>CLDN5</i>                        | 4,065             | 3.98  | 6.94E-05 | ++++-++    | 639              | 1.58  | 0.11     | +?         |
| cg23586595 | 4   | 84034390  | <i>PLAC8</i>                        | 4,065             | 4.21  | 2.53E-05 | +++++++    | 639              | 0.18  | 0.86     | +?         |
| cg23054394 | 3   | 140784675 | <i>SPSB4</i>                        | 4,065             | -4.15 | 3.27E-05 | -----      | 639              | -0.89 | 0.38     | -?         |

CHR: chromosome, MAPINFO: position in bp (hg19), N: sample size

\* The signs indicate the association directions in Atherosclerosis Risk in Communities (ARIC) study, Biobanking and BioMolecular resources Research Infrastructure (BBMRI), Rotterdam study (RS), Lothian Birth Cohort 1936 (LBC1936), Cardiovascular Health Study (CHS), Coronary Artery Risk Development In young Adults (CARDIA) study, Study of Health in Pomerania (SHIP), Framingham Heart study (FHS) DSE (dual spin-echo) and FLAIR (Fluid-attenuated Inversion Recovery) studies, respectively. † The signs indicate the association directions in ARIC study and Genetic Epidemiology Network of Arteriopathy (GENOA) study.

Supplementary Table 5 Single CpG association with white matter hyperintensities stratified by hypertension status ( $P < 1 \times 10^{-5}$ )

| CpG                          | CHR | MAPINFO   | Nearest Gene   | Discovery |        |          |      |      |             | First replication set |         |      |                        | Second replication set <sup>‡</sup> |            |      |
|------------------------------|-----|-----------|----------------|-----------|--------|----------|------|------|-------------|-----------------------|---------|------|------------------------|-------------------------------------|------------|------|
|                              |     |           |                | N         | Z      | P        | Q    | FDR  | Direction*  | N                     | Z score | P    | Direction <sup>†</sup> | N                                   | Beta±SE    | P    |
| <b>Hypertensive Subgroup</b> |     |           |                |           |        |          |      |      |             |                       |         |      |                        |                                     |            |      |
| cg23570810                   | 11  | 315102    | <i>IFITM1</i>  | 2,785     | -4.764 | 1.90E-06 | 0.44 | 0.42 | -----?----  | 1,212                 | 1.739   | 0.08 | +?+                    | 619                                 | 0.004±0.04 | 0.91 |
| cg05166317                   | 7   | 158857428 | <i>VIPR2</i>   | 1,835     | -4.746 | 2.07E-06 | 0.44 | 0.43 | +-----?-+?? | 1,067                 | 0.678   | 0.50 | +?+                    | 619                                 | 0.07±0.07  | 0.28 |
| cg24784730                   | 12  | 125225655 | <i>SCARB1</i>  | 2,785     | 4.623  | 3.79E-06 | 0.54 | 0.72 | ++++++?++++ | 419                   | -0.427  | 0.67 | +?+                    |                                     |            |      |
| cg07676167                   | 8   | 124253055 | <i>C8orf76</i> | 2,785     | 4.492  | 7.07E-06 | 0.66 | 0.95 | ++++++?++++ | 477                   | -0.666  | 0.51 | -?+                    |                                     |            |      |
| cg25317585                   | 13  | 102568886 | <i>FGF14</i>   | 2,785     | 4.471  | 7.80E-06 | 0.66 | 0.98 | ++++++?-+++ | 1,212                 | 0.626   | 0.53 | +--+                   | 615                                 | -0.10±0.10 | 0.30 |
| cg14392283                   | 8   | 144103587 | <i>LY6E</i>    | 2,785     | -4.419 | 9.93E-06 | 0.70 | 1.00 | -----?----  | 1,212                 | 2.485   | 0.01 | ++++                   | 619                                 | 0.11±0.06  | 0.06 |
| <b>Normotensive Subgroup</b> |     |           |                |           |        |          |      |      |             |                       |         |      |                        |                                     |            |      |
| cg06450373                   | 5   | 19766434  | <i>CDH18</i>   | 2,354     | -5.405 | 6.48E-08 | 0.03 | 0.04 | --?--?----  | 2,157                 | 0.700   | 0.48 | --+?                   |                                     |            |      |
| cg18950108                   | 6   | 30920171  | <i>DPCR1</i>   | 2,516     | -4.951 | 7.37E-07 | 0.15 | 0.40 | -----?----  | 2,181                 | -1.284  | 0.20 | +--                    |                                     |            |      |
| cg11706163                   | 5   | 39364495  | <i>C9</i>      | 2,581     | -4.551 | 5.35E-06 | 0.60 | 0.77 | -----       | 2,181                 | -0.967  | 0.33 | --+                    | 584                                 | 0.03±0.07  | 0.69 |
| cg19719207                   | 4   | 121839493 | <i>PRDM5</i>   | 2,516     | -4.527 | 5.98E-06 | 0.60 | 0.77 | -----?+--   | 2,181                 | 1.140   | 0.25 | ++++                   | 615                                 | -0.06±0.05 | 0.28 |
| cg26629184                   | 16  | 15149018  | <i>NTAN1</i>   | 2,516     | 4.491  | 7.08E-06 | 0.60 | 0.77 | +++++?++++- | 2,181                 | -0.384  | 0.70 | +?+                    | 614                                 | 0.05±0.05  | 0.37 |

CHR: chromosome, MAPINFO: position in bp (hg19), N: sample size, FDR: false discovery rate, SE: standard error, extreme-SVD: extremes of cerebral small vessel disease

\* The signs indicate the association directions in Atherosclerosis Risk in Communities (ARIC) African ancestry (AA), ARIC European ancestry (EA), Biobanking and BioMolecular resources Research Infrastructure (BBMRI), Rotterdam study (RS), Lothian Birth Cohort 1936 (LBC1936), Cardiovascular Health Study (CHS), Genetic Epidemiology Network of Arteriopathy (GENOA), Coronary Artery Risk Development In young Adults (CARDIA), Study of Health in Pomerania (SHIP), Framingham Heart study (FHS) DSE (dual spin-echo) and FLAIR (Fluid-attenuated Inversion Recovery) studies, respectively.

† The signs indicate the association directions in Alzheimer's Disease Neuroimaging Initiative (ADNI), FHS (3rd generation), Rhineland study, and Older Australian Twin Study (OATS), respectively.

‡ Association between extreme-SVD and Hi-seq bisulfite sequencing DNA methylation level in the BRain Imaging, cognition, Dementia and next generation GENomics: a Transdisciplinary approach to search for risk and protective factors of neurodegenerative disease ( BRIDGET) study



| CpG        | CHR | POS (hg19) | RegulomeDB |       |                                                   |               | GeneHancer DB version   |           |                      |           |                                                         |              |                                                                                                                                                                                                                                                                                                                                                                                                                                                                                                                                                                                                                                                                                                                                                                                                                                                                                                                                                                                                       |                                                                                                                                                         |        |  | Total score ‡ |
|------------|-----|------------|------------|-------|---------------------------------------------------|---------------|-------------------------|-----------|----------------------|-----------|---------------------------------------------------------|--------------|-------------------------------------------------------------------------------------------------------------------------------------------------------------------------------------------------------------------------------------------------------------------------------------------------------------------------------------------------------------------------------------------------------------------------------------------------------------------------------------------------------------------------------------------------------------------------------------------------------------------------------------------------------------------------------------------------------------------------------------------------------------------------------------------------------------------------------------------------------------------------------------------------------------------------------------------------------------------------------------------------------|---------------------------------------------------------------------------------------------------------------------------------------------------------|--------|--|---------------|
|            |     |            | Rank       | Score | Transcriptional Factor (TF) Motifs                | GeneHancer ID | Location                | Size (kb) | GeneHancer (GH) Type | GH score* | GH Sources                                              | TSS distance | TF binding Sites                                                                                                                                                                                                                                                                                                                                                                                                                                                                                                                                                                                                                                                                                                                                                                                                                                                                                                                                                                                      | Gene Targets (Gene-GeneHancer Scores)†                                                                                                                  |        |  |               |
|            |     |            |            |       | F168520),PAX5(TSTFF14184,TSTFF674641,TSTFF609420) |               |                         |           |                      |           |                                                         |              |                                                                                                                                                                                                                                                                                                                                                                                                                                                                                                                                                                                                                                                                                                                                                                                                                                                                                                                                                                                                       |                                                                                                                                                         |        |  |               |
| cg17577122 | 22  | 19511967   | 2b         | 0.51  | EGR1(TSTFF702532,TSTFF389778),EGR2(TSTFF899152)   | GH22J019521   | chr22:19508524-19512924 | 4.4       | Promoter/Enhancer    | 1.7       | EPDnew,Ensembl,ENCODE,CraniofacialAtlas                 | +4.3         | 24 TFs (HNRNPL, ZIC2, HNRNPUL1, EZH2, ZBTB20, POLR2A, MTA3, ZBED1, KDM4B, NFIC, ZFH2, STAT5A, MYNN, ZNF621, SAFB, CBX1, SUPT5H, ZBTB33, ZNF184, TBP, EGR2, BACH1, SP1, POLR2B)                                                                                                                                                                                                                                                                                                                                                                                                                                                                                                                                                                                                                                                                                                                                                                                                                        | CLDN5 (600.7), ENSG00000287652 (600.7), UFD1 (37.4), MED15 (15.7), RPL7AP70 (13.2), DGCR11 (12.0), ENSG00000185065 (10.1), LINC00895 (0.3), CDC45 (0.3) | 1010   |  |               |
| cg23586595 | 4   | 84034390   | 3a         | 0.60  | AKR1B1, AR(TSTFF225703)                           | GH04J083107   | chr4:84028384-84037718  | 9.3       | Promoter/Enhancer    | 2.4       | EPDnew,FANTOM5,Ensembl,ENCODE,CraniofacialAtlas,dbSUPER | +25.2        | 140 TFs (HNRNPL, CREB1, CTCF, TEAD4, PRDM10, REST, POLR2A, BACH1, TARDBP, FOXA1, LARP7, STAT3, ZNF143, RELA, ZIC2, PKNOX1, PATZ1, SMAD5, RAD21, TCF12, IKZF2, ZNF501, TRIM22, EZH2, ELF4, ZNF600, YY1, IRF3, ZNF341, SCRT2, EED, SOX13, ZBTB44, ZBTB20, SIN3A, SP2, ELK1, SP1, ELK4, RFX1, DPF2, RELB, JUND, ZXDB, SMARCA5, RUNX3, ZBTB10, GATAD2B, CTBP1, ZKSCAN8, ZNF444, ASH2L, BCLAF1, FOXA2, CBFB, E2F1, E4F1, ZBTB26, ZNF592, SMC3, GABPA, KLF4, GTF2F1, ZNF217, MYC, SCRT1, MAX, ARNT, ELF1, ZBTB11, NFIC, NBN, HDGF, KLF8, IKZF1, BMI1, SAP130, ZNF777, ZNF189, KLF9, TBP, GATA3, JUNB, ZNF335, CHD1, STAT1, SPI1, PRDM4, IRF4, RCOR1, EBF1, DRAP1, FOSL2, RB1, ZNF366, HOMEZ, KLF5, ZNF687, RFX5, STAT5A, ZBTB7B, PRDM6, ATF2, ZNF660, TRIM28, TBX21, ZNF2, ARID4B, ATF7, TAF1, SMARCA4, ZFP37, MTA2, NR2F6, MTA3, SP3, KLF1, BHLHE40, NR2F1, MNT, GABPB1, ZNF24, NFYC, L3MBTL2, ZNF362, NKRF, ZNF384, SREBF1, PPARG, MZF1, SP7, BCL3, ZNF121, GLIS2, RXRA, ETV6, CREM, MLLT1, ZBTB33, ZEB2) | PLAC8 (625.1), HELQ (3.5), THAP9 (2.8), LIN54 (2.2), COQ2 (2.1), HPSE (1.5), lnc-LIN54-3 (0.7), lnc-COPS4-1 (0.4), COPS4 (0.2)                          | 1485.9 |  |               |
| cg23054394 | 3   | 140784675  | 5          | 0.13  | ALX1(TSTFF414516)                                 |               |                         |           |                      |           |                                                         |              |                                                                                                                                                                                                                                                                                                                                                                                                                                                                                                                                                                                                                                                                                                                                                                                                                                                                                                                                                                                                       |                                                                                                                                                         |        |  |               |

TSS: Transcriptional starting site

### RegulomeDB

Score: Supporting data

1a: expression quantitative loci (eQTL) + Transcriptional factor (TF) binding + matched TF motif + matched DNase Footprint + DNase peak; 1b: eQTL + TF binding + any motif + DNase Footprint + DNase peak; 1c: eQTL + TF binding + matched TF motif + DNase peak; 1d: eQTL + TF binding + any motif + DNase peak; A71 1e: eQTL + TF binding + matched TF motif; 1f: eQTL + TF binding / DNase peak; 2a: TF binding + matched TF motif + matched DNase Footprint + DNase peak; 2b: TF binding + any motif + DNase Footprint + DNase peak; 2c: TF binding + matched TF motif + DNase peak; 3a: TF binding + any motif + DNase peak; 3b: TF binding + matched TF motif; 4: TF binding + DNase peak; 5: TF binding or DNase peak; 6: Motif hit; 7: Other

The RegulomeDB probability score is ranging from 0 to 1, with 1 being most likely to be a regulatory variant.

### GeneHancer

\*GH score is a confidence score which is computed based on a combination of evidence annotations: (1) Number of sources; (2) Source scores; (3) TFBSs (from ENCODE). Sources are the ENCODE project, Ensembl regulatory build, FANTOM5 atlas of active enhancers, VISTA Enhancer Browser, dbSUPER, EPDnew, UCNEbase, CraniofacialAtlas.

†The gene-GeneHancer score for each gene target is a combined score for each proximal gene based on all methods (p-values for eQTLs and co-expression, log(observed/expected) for C-HiC, and distance-inferred probability).

‡ Total score - multiplication of the GeneHancer confidence score and the GeneHancer-gene association score, gene-GeneHancer distance (calculated between the GeneHancer midpoint and the gene TSS, positive for downstream and negative for upstream), number of genes having a TSS between the gene and the GeneHancer, and a list of all genes associated with the GeneHancer.

Supplementary Table 7 Previously reported epigenetic associations for target CpGs

| Probe ID   | Trait                                | Pubmed Reference ID                              | Source* |
|------------|--------------------------------------|--------------------------------------------------|---------|
| cg24202936 | HIV infection                        | 27105112                                         | C       |
| cg17417856 | smoking                              | 31536415, 31552803, 25556184, 27651444, 28686328 | C and A |
|            | age                                  | 28056824, 23177740                               | C       |
|            | Crohn's disease                      | 27886173                                         | C       |
|            | systolic blood pressure              | 29198723                                         | C       |
|            | alcohol consumption per day          | 27843151                                         | C       |
|            | Educational attainment               | 29086770                                         | C       |
|            | chemotherapy for breast cancer       | 30867049                                         | A       |
| cg01506471 | IL-13 treatment                      | 26474238                                         | C and A |
| cg14547240 | rheumatoid arthritis                 | 23334450                                         | C       |
| cg21547371 | gestational age                      | 25650246                                         | C       |
|            | asthma                               | 27942592                                         | A       |
|            | obesity                              | 29692867                                         | A       |
| cg03116124 | age group                            | 25888029                                         | C       |
|            | Down Syndrome                        | 29601581                                         | A       |
|            | colorectal laterally spreading tumor | 30183087                                         | A       |
|            | adenoma                              | 30183087                                         | A       |
| cg13476133 | age                                  | 25282492                                         | C       |
|            | B Acute Lymphoblastic Leukemia       | 26237075                                         | A       |
|            | breast cancer                        | 30866861                                         | A       |
|            | Follicular thyroid carcinoma         | 28938489                                         | A       |
| cg14133539 | HIV infection                        | 27105112                                         | C       |
|            | right insular surface area           | 30830696                                         | A       |
| cg06809326 | sex                                  | 26500701                                         | C       |
|            | Down Syndrome                        | 29601581, 31843015                               | A       |
| cg17577122 | hepatocellular carcinoma (HCC)       | 23208076                                         | A       |
|            | colorectal cancer                    | 30183087                                         | A       |
| cg23586595 | clear cell renal carcinoma           | 23526956                                         |         |
|            | smoking                              | 31536415, 31552803, 25424692, 27651444           | C and A |
|            | pancreatic ductal adenocarcinoma     | 24500968                                         | C       |
|            | rheumatoid arthritis                 | 23334450                                         | C       |
|            | Behcet's disease                     | 30863869                                         | A       |
| cg23054394 | psoriasis                            | 30092825                                         | A       |
|            | chronic beryllium disease            | 30141971                                         | A       |

\*C: Epigenome-wide association study (EWAS) Catalog (beta), A: EWAS Atlas.

Epigenome-wide association studies (EWAS) traits associated with target CpGs ( $P < 1.0 \times 10^{-5}$ ) are presented.

**Supplementary Table 8 Differentially Methylated Regions (DMRs) associated with white matter hyperintensities burden**

| Nearest Gene                               | Chr | start (hg19) | end (hg19) | #probe | P <sub>Comb-p</sub>     | #probe | P <sub>DMRCate</sub>    | Distance from Gene (bp) | P <sub>Replication1</sub> * | P <sub>Replication2</sub> † |
|--------------------------------------------|-----|--------------|------------|--------|-------------------------|--------|-------------------------|-------------------------|-----------------------------|-----------------------------|
| <i>PRMT1</i>                               | 19  | 50191342     | 50191883   |        | 66.98x10 <sup>-13</sup> |        | 83.53x10 <sup>-12</sup> |                         | 0.00                        | 6.67x10 <sup>-3</sup>       |
| <i>CCDC144NL-AS1</i> ;<br><i>CCDC144NL</i> | 17  | 20799408     | 20799645   |        | 65.23x10 <sup>-10</sup> |        | 64.91x10 <sup>-10</sup> |                         | 0.82                        | 0.15                        |
| <i>ABAT</i>                                | 16  | 8806359      | 8807044    |        | 135.00x10 <sup>-8</sup> |        | 133.81x10 <sup>-6</sup> |                         | 0.19x10 <sup>-2</sup>       | 2.72x10 <sup>-4</sup>       |
| <i>BHMT2</i>                               | 5   | 78365647     | 78365802   |        | 53.19x10 <sup>-6</sup>  |        | 76.64x10 <sup>-6</sup>  |                         | 0.147x10 <sup>-3</sup>      | 1.00                        |
| <i>SEPTIN7P11</i>                          | 11  | 50257256     | 50257497   |        | 24.20x10 <sup>-4</sup>  |        | 66.64x10 <sup>-6</sup>  |                         | 0.14                        | 1.00                        |
| <i>VARS2</i>                               | 6   | 30882994     | 30883204   |        | 51.42x10 <sup>-3</sup>  |        | 147.31x10 <sup>-6</sup> |                         | 0.09                        |                             |
| <i>ZNF311</i>                              | 6   | 28973318     | 28973525   |        | 112.22x10 <sup>-5</sup> |        | 176.21x10 <sup>-5</sup> |                         | 0.00                        |                             |
| <i>C11orf21</i>                            | 11  | 2321770      | 2322051    |        | 91.67x10 <sup>-4</sup>  |        | 121.41x10 <sup>-4</sup> |                         | 0.152x10 <sup>-3</sup>      | 1.00                        |
| <i>MRPL23</i>                              | 11  | 1990900      | 1991189    |        | 38.53x10 <sup>-4</sup>  |        | 44.20x10 <sup>-4</sup>  | 13071                   | 0.39                        |                             |
| <i>UBE3C</i>                               | 7   | 157092682    | 157092983  |        | 21.39x10 <sup>-4</sup>  |        | 26.39x10 <sup>-4</sup>  | 30618                   | 0.68                        | 0.13                        |
| <i>CHORDC1</i>                             | 11  | 89956517     | 89957034   |        | 83.19x10 <sup>-3</sup>  |        | 107.63x10 <sup>-4</sup> |                         | 0.00                        | 1.00                        |
| <i>IZUMO1</i>                              | 19  | 49249932     | 49250253   |        | 39.24x10 <sup>-4</sup>  |        | 78.30x10 <sup>-4</sup>  |                         | 0.135x10 <sup>-3</sup>      | 1.00                        |
| <i>YF1B</i>                                | 19  | 38794554     | 38794846   |        | 62.37x10 <sup>-4</sup>  |        | 71.64x10 <sup>-3</sup>  |                         | 0.11                        | 0.75                        |
| <i>KCNA6</i>                               | 12  | 4918169      | 4918392    |        | 34.97x10 <sup>-2</sup>  |        | 52.33x10 <sup>-3</sup>  |                         | 0.29                        | 1.00                        |
| <i>C5orf66</i>                             | 5   | 134526124    | 134526270  |        | 49.67x10 <sup>-4</sup>  |        | 42.33x10 <sup>-3</sup>  |                         | 0.32                        | 3.19x10 <sup>-2</sup>       |
| <i>SLC12A4</i>                             | 16  | 67997858     | 67998165   |        | 43.06x10 <sup>-4</sup>  |        | 52.65x10 <sup>-3</sup>  |                         | 0.00                        | 0.36                        |
| <i>ZBTB44-DT</i>                           | 11  | 130185384    | 130185671  |        | 33.37x10 <sup>-3</sup>  |        | 32.92x10 <sup>-3</sup>  |                         | 0.00                        | 1.00                        |
| <i>IGSF22</i>                              | 11  | 18727321     | 18727775   |        | 42.78x10 <sup>-4</sup>  |        | 53.12x10 <sup>-3</sup>  |                         | 0.93                        | 0.06                        |
| <i>LINC01135</i>                           | 1   | 59280290     | 59280620   |        | 45.27x10 <sup>-3</sup>  |        | 73.12x10 <sup>-3</sup>  |                         | 0.00                        | 1.00                        |
| <i>IFITM1</i>                              | 11  | 315102       | 315263     |        | 33.74x10 <sup>-2</sup>  |        | 33.14x10 <sup>-3</sup>  |                         | 0.88                        | 0.90                        |
| <i>PPP2R2A</i>                             | 8   | 26047780     | 26048066   |        | 51.69x10 <sup>-2</sup>  |        | 83.51x10 <sup>-3</sup>  | -100957                 | 0.97                        | 0.84                        |
| <i>SH3PXD2A</i>                            | 10  | 105428385    | 105428819  |        | 52.55x10 <sup>-4</sup>  |        | 53.57x10 <sup>-3</sup>  |                         | 0.73                        | 1.00                        |
| <i>KCNK10</i>                              | 14  | 88621424     | 88621697   |        | 42.46x10 <sup>-2</sup>  |        | 43.57x10 <sup>-3</sup>  | 24754                   | 0.85                        | 1.00                        |
| <i>LMF1</i> ; <i>LMF1-AS1</i>              | 16  | 979488       | 979663     |        | 35.66x10 <sup>-3</sup>  |        | 43.67x10 <sup>-3</sup>  |                         | 0.99                        | 1.00                        |
| <i>KIF12</i>                               | 9   | 116861288    | 116861533  |        | 42.22x10 <sup>-3</sup>  |        | 44.26x10 <sup>-3</sup>  |                         | 0.33                        | 1.00                        |
| <i>ARHGEF10</i>                            | 8   | 1847999      | 1848144    |        | 21.12x10 <sup>-2</sup>  |        | 24.88x10 <sup>-3</sup>  |                         | 0.16                        | 0.98                        |
| <i>ZBTB38</i>                              | 3   | 141087187    | 141087364  |        | 52.36x10 <sup>-3</sup>  |        | 65.91x10 <sup>-3</sup>  |                         | 0.12                        | 0.15                        |
| <i>IFITM10</i>                             | 11  | 1769152      | 1769646    |        | 95.44x10 <sup>-4</sup>  |        | 97.42x10 <sup>-3</sup>  |                         | 0.00                        | 0.98                        |
| <i>PARP9</i>                               | 3   | 122281881    | 122281976  |        | 32.60x10 <sup>-2</sup>  |        | 38.38x10 <sup>-3</sup>  |                         | 0.00                        | 1.00                        |
| <i>ENPEP</i>                               | 4   | 111397134    | 111397402  |        | 61.32x10 <sup>-2</sup>  |        | 78.39x10 <sup>-3</sup>  |                         | 0.87                        | 4.65x10 <sup>-2</sup>       |
| <i>SLC35F3</i>                             | 1   | 234367322    | 234367587  |        | 41.32x10 <sup>-2</sup>  |        | 51.08x10 <sup>-2</sup>  |                         | 0.147x10 <sup>-2</sup>      | 0.19                        |
| <i>BNIP3</i>                               | 10  | 133793442    | 133793735  |        | 53.43x10 <sup>-3</sup>  |        | 51.16x10 <sup>-2</sup>  |                         | 0.30                        | 0.81                        |
| <i>FBXO47</i>                              | 17  | 37123638     | 37123950   |        | 91.88x10 <sup>-3</sup>  |        | 91.17x10 <sup>-2</sup>  |                         | 0.58x10 <sup>-6</sup>       |                             |
| <i>CUEDC1</i>                              | 17  | 55962522     | 55962842   |        | 43.60x10 <sup>-3</sup>  |        | 51.17x10 <sup>-2</sup>  |                         | 0.00                        | 1.00                        |
| <i>SLC45A4</i>                             | 8   | 142233427    | 142233706  |        | 22.04x10 <sup>-2</sup>  |        | 21.20x10 <sup>-2</sup>  |                         | 0.55                        | 5.84x10 <sup>-3</sup>       |
| <i>MYCL</i>                                | 1   | 40388223     | 40388396   |        | 35.32x10 <sup>-3</sup>  |        | 31.20x10 <sup>-2</sup>  | -20634                  | 0.41                        | 0.92                        |
| <i>TCF7</i>                                | 5   | 133451383    | 133451626  |        | 34.71x10 <sup>-2</sup>  |        | 81.45x10 <sup>-2</sup>  |                         | 0.74                        | 0.68                        |
| <i>KCTD16</i>                              | 5   | 143978290    | 143978421  |        | 47.95x10 <sup>-3</sup>  |        | 41.60x10 <sup>-2</sup>  | 113041                  | 9.92x10 <sup>-7</sup>       | 3.12x10 <sup>-2</sup>       |
| <i>ZBTB46</i>                              | 20  | 62406428     | 62406722   |        | 36.34x10 <sup>-3</sup>  |        | 31.99x10 <sup>-2</sup>  |                         | 0.71                        | 1.00                        |
| <i>KITLG</i>                               | 12  | 88974243     | 88974666   |        | 48.23x10 <sup>-3</sup>  |        | 92.03x10 <sup>-2</sup>  |                         | 0.00                        | 3.49x10 <sup>-3</sup>       |
| <i>EDDM3A</i>                              | 14  | 21191754     | 21191860   |        | 23.48x10 <sup>-2</sup>  |        | 22.06x10 <sup>-2</sup>  | -22185                  | 0.64                        | 1.00                        |
| <i>LINC02346</i>                           | 15  | 26327895     | 26328093   |        | 34.78x10 <sup>-2</sup>  |        | 32.54x10 <sup>-2</sup>  | 29628                   | 0.65                        | 0.92                        |
| <i>UCN3</i>                                | 10  | 5406890      | 5407120    |        | 87.76x10 <sup>-3</sup>  |        | 82.61x10 <sup>-2</sup>  |                         | 0.278x10 <sup>-2</sup>      | 1.00                        |
| <i>NFIC</i>                                | 19  | 3387811      | 3388048    |        | 31.21x10 <sup>-2</sup>  |        | 32.95x10 <sup>-2</sup>  |                         | 0.97                        | 0.34                        |
| <i>KLHDC7B</i>                             | 22  | 50984368     | 50984598   |        | 33.99x10 <sup>-2</sup>  |        | 24.05x10 <sup>-2</sup>  |                         | 0.00                        | 0.54                        |
| <i>RASA3</i>                               | 13  | 114875170    | 114875413  |        | 43.28x10 <sup>-2</sup>  |        | 24.84x10 <sup>-2</sup>  |                         | 0.00                        | 0.88                        |

P<sub>Comb-p</sub>: combined p value after Sidak multiple testing adjustment, P<sub>DMRCate</sub>: Benjamini-Hochberg FDR p-value from the CpGs constituting the significant region, regional differential methylation signals can be calculated using neighboring CpGs within 1000 base pairs (bp). More than one CpG resides in the region. For replication, PDMRCate is reported in the replication set 1 and 2.

\*Associations in the replication set 1 includes Alzheimer's Disease Neuroimaging Initiative (ADNI), FHS (3rd generation), Rhineland study, and Older Australian Twin Study (OATS), respectively, were combined.

† Associations between extreme-SVD and Hi-seq bisulfite sequencing DNA methylation level in the BRain Imaging, cognition, Dementia and next generation GENomics: a Transdisciplinary approach to search for risk and protective factors of neurodegenerative disease (BRIDGET) study were combined.

**Supplementary Table 9 Gene-set enrichment analysis of identified DMRs**

| Gene Ontology (GO) ID | N   | DE | P.DE     | FDR      | Ontology type      | Description                                                                     |
|-----------------------|-----|----|----------|----------|--------------------|---------------------------------------------------------------------------------|
| GO:0097677            | 8   | 2  | 7.56E-05 | 4.91E-03 | molecular function | signal transducers and activators of transcription family protein binding       |
| GO:2001034            | 12  | 2  | 2.30E-04 | 5.68E-03 | biological process | positive regulation of double-strand break repair via nonhomologous end joining |
| GO:0051607            | 205 | 4  | 2.79E-04 | 5.68E-03 | biological process | defense response to virus                                                       |
| GO:0035563            | 13  | 2  | 3.49E-04 | 5.68E-03 | biological process | positive regulation of chromatin binding                                        |
| GO:0044389            | 23  | 2  | 8.26E-04 | 1.07E-02 | molecular function | ubiquitin-like protein ligase binding                                           |
| GO:0002230            | 35  | 2  | 1.04E-03 | 1.13E-02 | biological process | positive regulation of defense response to virus by host                        |
| GO:0008327            | 28  | 2  | 1.29E-03 | 1.20E-02 | molecular function | methyl-CpG binding                                                              |
| GO:0004857            | 32  | 2  | 1.49E-03 | 1.21E-02 | molecular function | enzyme inhibitor activity                                                       |
| GO:1900182            | 26  | 2  | 1.70E-03 | 1.23E-02 | biological process | positive regulation of protein localization to nucleus                          |
| GO:0032024            | 42  | 2  | 5.82E-03 | 3.78E-02 | biological process | positive regulation of insulin secretion                                        |
| GO:0006302            | 81  | 2  | 6.98E-03 | 4.13E-02 | biological process | double-strand break repair                                                      |
| GO:0043679            | 53  | 2  | 7.73E-03 | 4.19E-02 | cellular component | axon terminus                                                                   |
| GO:0005765            | 361 | 3  | 3.17E-02 | 0.15     | cellular component | lysosomal membrane                                                              |
| GO:0042393            | 152 | 2  | 3.40E-02 | 0.15     | molecular function | histone binding                                                                 |
| GO:0071456            | 123 | 2  | 3.41E-02 | 0.15     | biological process | cellular response to hypoxia                                                    |
| GO:0001650            | 134 | 2  | 3.85E-02 | 0.16     | cellular component | fibrillar center                                                                |
| GO:0019899            | 353 | 3  | 4.98E-02 | 0.19     | molecular function | enzyme binding                                                                  |
| GO:0006888            | 235 | 2  | 0.05     | 0.20     | biological process | endoplasmic reticulum to Golgi vesicle-mediated transport                       |

N: number of genes in the gene set, DE: number of genes that are differentially methylated, P.DE: p-value for over-representation of the gene set, FDR: False discovery rate, calculated using the method of Benjamini and Hochberg (1995).

**Supplementary Table 10 Multivariate epigenetic associations of white matter hyperintensities burden and blood pressure**

| BP trait | CoG        | CHR | MAPINFO   | Gene                  | Z.WMH | P.WMH    | Z.BP  | P.BP     | P <sub>metaUSAT</sub> |
|----------|------------|-----|-----------|-----------------------|-------|----------|-------|----------|-----------------------|
| DBP      | cg23291754 | 4   | 71767977  | <i>MOBKLL1A</i>       | 3.60  | 3.17E-04 | -4.21 | 2.57E-05 | 2.38E-07              |
|          | cg24372586 | 6   | 30520094  | <i>GNL1</i>           | -3.86 | 1.16E-04 | -3.49 | 4.77E-04 | 7.84E-07              |
| SBP      | cg00711496 | 14  | 103415873 | <i>CDC42BPB</i>       | -4.32 | 1.54E-05 | -3.50 | 4.66E-04 | 1.99E-07              |
|          | cg04987734 | 19  | 50191497  | <i>C19orf76;PRMT1</i> | 3.64  | 2.72E-04 | 4.10  | 4.13E-05 | 3.09E-07              |
|          | cg00934987 | 17  | 56605468  | <i>SEPT4</i>          | -3.90 | 9.58E-05 | -3.52 | 4.38E-04 | 1.07E-06              |
|          | cg18770635 | 22  | 50984368  | <i>KLHDC7B</i>        | -3.38 | 7.32E-04 | -3.91 | 9.33E-05 | 1.68E-06              |

BP: blood pressure; DBP: diastolic BP; SBP: systolic BP; WMH: white matter hyperintensities. Z.WMH and P.WMH from WMH discovery epigenome-wide association study (EWAS), Z.BP and P.BP from BP EWAS<sup>a</sup>. P<sub>metaUSAT</sub>: multivariate association *P* value of BP trait and WMH.

a. Richard, M. A., Huan, T., Ligthart, S., et al DNA methylation analysis identifies loci for blood pressure regulation. *Am J Hum Genet.* 2017; 101(6): 888-902.



**Supplementary Table 11 Genetic Instruments for cg06809326 and cg24202936 and their associations with WMH burden**

| Target CpG | SNP         | Chr | Position (hg19) | A1 | A2 | mQTL (Huan T, 2019, Nat Comm, n=4,170) |       |       |           | UKBB WMH GWAS (Persyn E, 2020, Nat Comm, n=18,381) |       |       |          |
|------------|-------------|-----|-----------------|----|----|----------------------------------------|-------|-------|-----------|----------------------------------------------------|-------|-------|----------|
|            |             |     |                 |    |    | Freq_A1                                | beta  | se    | pval      | Freq_A1                                            | beta  | se    | pval     |
| cg24202936 | rs11040621  | 11  | 49903163        | T  | C  | 0.12                                   | -0.04 | 0.003 | 3.25E-41  | 0.15                                               | 0.02  | 0.013 | 0.10     |
|            | rs143272961 | 11  | 55342613        | G  | A  | 0.01                                   | 0.14  | 0.014 | 1.41E-23  | 0.03                                               | 0.06  | 0.033 | 0.08     |
|            | rs4312050   | 11  | 51253295        | T  | G  | 0.16                                   | 0.04  | 0.003 | 2.34E-37  | 0.16                                               | -0.01 | 0.013 | 0.47     |
|            | rs7126006   | 11  | 49770456        | G  | T  | 0.18                                   | 0.07  | 0.002 | 3.09E-171 | 0.18                                               | 0.01  | 0.013 | 0.51     |
| cg06809326 | rs113796679 | 17  | 21062647        | A  | G  | 0.06                                   | -0.05 | 0.005 | 6.50E-23  | 0.06                                               | -0.01 | 0.020 | 0.51     |
|            | rs2993353   | 17  | 20719173        | T  | C  | 0.35                                   | -0.03 | 0.003 | 3.76E-30  | 0.31                                               | -0.02 | 0.010 | 2.72E-02 |
|            | rs8067432   | 17  | 20827039        | C  | T  | 0.32                                   | -0.05 | 0.002 | 4.17E-122 | 0.33                                               | -0.01 | 0.010 | 0.28     |

Freq\_A1 (frequency of allele 1 (A1)), beta and its standard error (SE), and P value (pval) are calculated for A1. Genetic instruments for the exposure are curated from mQTL (Huan T, 2019, Nat Comm), and pruned at  $r^2 < 0.05$ . Loci non-existent or quality-controlled (low imputation quality or minor allele frequency) in UKBB GWAS data are replaced with a proxy ( $r^2 > 0.8$ ), if any.

Supplementary Table 12 Bi-directional Mendelian randomization (MR) analysis of target CpGs with at least 3 instruments

| Exposure -> Outcome               | No. of IVs | IVW   |       |                       | Weighted Median |       |         | MR Egger |      |         | ConMix test |              |              | Pleiotropy test (Egger Intercept test) |       |         | Heterogeneity test (IVW) |    |         | Heterogeneity test (MR Egger) |    |         | MR PRESSO P value | IV strength |                |  |
|-----------------------------------|------------|-------|-------|-----------------------|-----------------|-------|---------|----------|------|---------|-------------|--------------|--------------|----------------------------------------|-------|---------|--------------------------|----|---------|-------------------------------|----|---------|-------------------|-------------|----------------|--|
|                                   |            | beta  | se    | P value               | beta            | se    | P value | beta     | se   | P value | beta        | 95% Lower CI | 95% Upper CI | beta                                   | se    | P value | Q                        | df | P value | Q                             | df | P value |                   | meanF (IVW) | I <sup>2</sup> |  |
| <b>Forward MR (CpG -&gt; WMH)</b> |            |       |       |                       |                 |       |         |          |      |         |             |              |              |                                        |       |         |                          |    |         |                               |    |         |                   |             |                |  |
| cg06809326 -> WMH                 | 3          | 0.33  | 0.15  | 2.91x10 <sup>-2</sup> | 0.23            | 0.17  | 0.17    | -0.59    | 0.72 | 0.56    | 0.33        | -0.10        | 1.20         | 0.04                                   | 0.03  | 0.41    | 1.73                     | 2  | 0.42    | 0.02                          | 1  | 0.89    | -                 | -           | 0.97           |  |
| cg24202936 -> WMH                 | 4          | 0.07  | 0.18  | 0.70                  | 0.12            | 0.15  | 0.42    | 0.71     | 0.29 | 0.13    | 0.13        | -1.36        | 0.13         | -0.04                                  | 0.02  | 0.13    | 6.34                     | 3  | 0.10    | 0.38                          | 2  | 0.83    | -                 | -           | 0.98           |  |
| <b>Backward MR (WMH-&gt; CpG)</b> |            |       |       |                       |                 |       |         |          |      |         |             |              |              |                                        |       |         |                          |    |         |                               |    |         |                   |             |                |  |
| WMH -> cg24202936                 | 8          | -0.01 | 0.02  | 0.72                  | -0.003          | 0.03  | 0.92    | 0.04     | 0.09 | 0.66    | -0.05       | -0.14        | 0.10         | -0.004                                 | 0.01  | 0.59    | 6.34                     | 7  | 0.50    | 6.01                          | 6  | 0.42    | 0.44              | 44.73       | 0.98           |  |
| WMH -> cg17417856                 | 8          | 0.01  | 0.02  | 0.38                  | 0.01            | 0.02  | 0.52    | -0.03    | 0.06 | 0.64    | 0.02        | -0.05        | 0.10         | 0.003                                  | 0.004 | 0.49    | 2.47                     | 7  | 0.93    | 1.92                          | 6  | 0.93    | 0.92              | 44.73       | 0.98           |  |
| WMH -> cg01506471                 | 8          | 0.01  | 0.02  | 0.80                  | 0.01            | 0.03  | 0.66    | -0.14    | 0.08 | 0.14    | 0.03        | -0.07        | 0.13         | 0.01                                   | 0.01  | 0.12    | 5.97                     | 7  | 0.54    | 2.65                          | 6  | 0.85    | 0.54              | 44.73       | 0.98           |  |
| WMH -> cg14547240                 | 8          | 0.03  | 0.02  | 0.15                  | 0.02            | 0.03  | 0.49    | -0.05    | 0.09 | 0.59    | 0.04        | -0.04        | 0.15         | 0.01                                   | 0.01  | 0.36    | 4.94                     | 7  | 0.67    | 3.98                          | 6  | 0.68    | 0.67              | 44.73       | 0.98           |  |
| WMH -> cg21547371                 | 8          | 0.03  | 0.02  | 0.25                  | 0.01            | 0.03  | 0.62    | -0.09    | 0.09 | 0.35    | 0.03        | -0.05        | 0.18         | 0.01                                   | 0.01  | 0.22    | 4.07                     | 7  | 0.77    | 2.24                          | 6  | 0.90    | 0.78              | 44.73       | 0.98           |  |
| WMH -> cg03116124                 | 8          | 0.01  | 0.02  | 0.72                  | -0.004          | 0.02  | 0.87    | -0.02    | 0.07 | 0.79    | -0.02       | -0.07        | 0.09         | 0.002                                  | 0.01  | 0.71    | 4.80                     | 7  | 0.68    | 4.65                          | 6  | 0.59    | 0.67              | 44.73       | 0.98           |  |
| WMH -> cg06809326                 | 8          | -0.01 | 0.03  | 0.76                  | -0.01           | 0.04  | 0.73    | 0.01     | 0.11 | 0.91    | -0.01       | -0.22        | 0.15         | -0.002                                 | 0.01  | 0.84    | 2.11                     | 7  | 0.95    | 2.07                          | 6  | 0.91    | 0.95              | 44.73       | 0.98           |  |
| WMH -> cg13476133                 | 8          | -0.01 | 0.01  | 0.55                  | -0.01           | 0.01  | 0.57    | 0.001    | 0.04 | 0.98    | -0.02       | -0.05        | 0.02         | -0.001                                 | 0.003 | 0.86    | 4.25                     | 7  | 0.75    | 4.21                          | 6  | 0.65    | 0.76              | 44.73       | 0.98           |  |
| WMH -> cg14133539                 | 8          | 0.03  | 0.02  | 0.17                  | 0.01            | 0.02  | 0.70    | -0.06    | 0.07 | 0.43    | 0.01        | -0.04        | 0.13         | 0.01                                   | 0.01  | 0.26    | 4.69                     | 7  | 0.70    | 3.13                          | 6  | 0.79    | 0.72              | 44.73       | 0.98           |  |
| WMH -> cg17577122                 | 8          | 0.005 | 0.003 | 0.15                  | 0.005           | 0.005 | 0.30    | 0.004    | 0.01 | 0.80    | 0.01        | 0.005        | 0.02         | 0.0001                                 | 0.001 | 0.93    | 6.79                     | 7  | 0.45    | 6.78                          | 6  | 0.34    | 0.45              | 44.73       | 0.98           |  |
| WMH -> cg23586595                 | 8          | 0.01  | 0.01  | 0.12                  | 0.01            | 0.01  | 0.11    | 0.0001   | 0.03 | 1.00    | 0.02        | 0.0003       | 0.03         | 0.001                                  | 0.002 | 0.68    | 2.79                     | 7  | 0.90    | 2.60                          | 6  | 0.86    | 0.92              | 44.73       | 0.98           |  |
| WMH -> cg23054394                 | 8          | 0.03  | 0.02  | 0.25                  | 0.02            | 0.03  | 0.48    | -0.10    | 0.09 | 0.30    | 0.07        | -0.07        | 0.17         | 0.01                                   | 0.01  | 0.19    | 5.53                     | 7  | 0.60    | 3.29                          | 6  | 0.77    | 0.60              | 44.73       | 0.98           |  |

CI: confidence interval, I<sup>2</sup>: Bowden statistic of instrument strength for the MR-Egger method. IVW: inverse variance-weighted, meanF: instrument strength for IVW method. No. IV: Number of instrumental variables (IVs) included. OR: Odds ratio, PMR and Beta (S.E.): P value, effect size (beta) and its standard error (S.E.) for the causal direction, primarily based on the IVW method, or in existence of pleiotropy (P<sub>pleiotropy</sub> <0.05) based on MR Egger method. P<sub>pleiotropy</sub>: P value estimated from MR Egger intercept pleiotropy test, WMH: white matter hyperintensities.

**Supplementary Table 13 Genetic Instruments for WMH burden and their associations with target CpGs**

| Trait | SNP        | Chr | Position (hg19) | A1 | A2 | Exposure: UKBB WMH GWAS (Persyn E, 2020, Nat Comm, n=18,381) |       |       |          | Outcome: mQTL (Huan T, 2019, Nat Comm, n=4,170) |            |       |      |            |       |      |
|-------|------------|-----|-----------------|----|----|--------------------------------------------------------------|-------|-------|----------|-------------------------------------------------|------------|-------|------|------------|-------|------|
|       |            |     |                 |    |    | Freq_A1                                                      | beta  | se    | pval     | Freq_A1                                         | cg06809326 |       |      | cg24202936 |       |      |
|       |            |     |                 |    |    |                                                              |       |       |          |                                                 | beta       | se    | pval | beta       | se    | pval |
| WMH   | rs12202497 | 6   | 151020020       | A  | T  | 0.59                                                         | -0.06 | 0.010 | 2.06E-09 | 0.59                                            | 0.002      | 0.01  | 0.71 | 0.01       | 0.004 | 0.18 |
|       | rs12571024 | 10  | 105635679       | T  | C  | 0.53                                                         | 0.06  | 0.010 | 4.96E-09 | 0.37                                            | -0.003     | 0.01  | 0.60 | -0.0003    | 0.005 | 0.94 |
|       | rs12615761 | 2   | 43103440        | T  | G  | 0.82                                                         | 0.07  | 0.013 | 7.32E-09 | 0.83                                            | -0.002     | 0.01  | 0.80 | -0.004     | 0.01  | 0.44 |
|       | rs12921170 | 16  | 87227397        | G  | A  | 0.58                                                         | 0.06  | 0.010 | 2.11E-09 | 0.43                                            | -0.003     | 0.005 | 0.62 | -0.005     | 0.004 | 0.26 |
|       | rs34974290 | 17  | 73888354        | G  | A  | 0.81                                                         | -0.11 | 0.012 | 4.03E-19 | 0.81                                            | -0.002     | 0.01  | 0.72 | -0.01      | 0.01  | 0.28 |
|       | rs3891038  | 7   | 100362411       | A  | G  | 0.71                                                         | 0.06  | 0.011 | 2.66E-08 | 0.70                                            | -0.005     | 0.01  | 0.42 | 0.001      | 0.005 | 0.91 |
|       | rs4525538  | 17  | 43141966        | A  | G  | 0.63                                                         | 0.07  | 0.010 | 3.32E-13 | 0.39                                            | 0.004      | 0.01  | 0.42 | 0.01       | 0.004 | 0.18 |
|       | rs78857879 | 2   | 56135099        | G  | A  | 0.90                                                         | -0.12 | 0.016 | 1.91E-13 | 0.91                                            | 0.001      | 0.01  | 0.87 | 0.002      | 0.01  | 0.75 |

Freq\_A1 (frequency of allele 1 (A1)), beta and its standard error (SE), and P value (pval) are calculated for A1. Genetic instruments for the exposure are curated from UKBB WMH GWAS (Persyn E, 2020, Nat Comm), and pruned at  $r^2 < 0.05$ . Loci non-existent or quality-controlled (low imputation quality or minor allele frequency) in mQTL data are replaced with a proxy ( $r^2 > 0.8$ ), if any.

Supplementary Table 14 Two-Step Mendelian randomization analysis for cg06809326

| GTEx version 8 Tissue                 | No. of IVs | IVW    |      |                        | Weighted Median |      |                       | MR Egger |       |      | ConMix test |              |              | Pleiotropy test (Egger Intercept test) |      |      | Heterogeneity test (IVW) |    |      | Heterogeneity test (MR Egger) |      |      | IV strength |                |
|---------------------------------------|------------|--------|------|------------------------|-----------------|------|-----------------------|----------|-------|------|-------------|--------------|--------------|----------------------------------------|------|------|--------------------------|----|------|-------------------------------|------|------|-------------|----------------|
|                                       |            | beta   | se   | P                      | beta            | se   | P                     | beta     | se    | P    | beta        | 95% Lower CI | 95% Upper CI | beta                                   | se   | P    | Q                        | df | P    | Q                             | df   | P    | meanF       | I <sup>2</sup> |
| <b>Step 1</b>                         |            |        |      |                        |                 |      |                       |          |       |      |             |              |              |                                        |      |      |                          |    |      |                               |      |      |             |                |
| <b>cg06809326 -&gt; CCDC144NL</b>     |            |        |      |                        |                 |      |                       |          |       |      |             |              |              |                                        |      |      |                          |    |      |                               |      |      |             |                |
| Brain Cortex                          | 3          | -5.90  | 1.82 | 1.21x10 <sup>-3</sup>  | -5.85           | 1.77 | 9.48x10 <sup>-4</sup> | -15.95   | 8.04  | 0.30 | -7.06       | -11.64       | 0.71         | 0.47                                   | 0.37 | 0.42 | 2.40                     | 2  | 0.30 | 0.77                          | 1.00 | 0.38 | NA          | 0.93           |
| Brain Caudate basal ganglia           | 3          | -7.34  | 2.25 | 1.11x10 <sup>-3</sup>  | -7.09           | 1.85 | 1.32x10 <sup>-4</sup> | -19.21   | 9.70  | 0.30 | -9.66       | -13.71       | 0.61         | 0.55                                   | 0.44 | 0.43 | 3.66                     | 2  | 0.16 | 1.43                          | 1.00 | 0.23 | 274.82      | 0.93           |
| Brain Cerebellum                      | 3          | -8.88  | 2.12 | 2.72x10 <sup>-5</sup>  | -10.08          | 1.77 | 1.24x10 <sup>-8</sup> | -22.75   | 7.78  | 0.21 | -10.47      | -14.05       | -6.55        | 0.65                                   | 0.35 | 0.32 | 3.45                     | 2  | 0.18 | 0.12                          | 1.00 | 0.73 | 274.82      | 0.93           |
| Brain Cerebellar Hemisphere           | 3          | -5.33  | 1.70 | 1.71x10 <sup>-3</sup>  | -5.84           | 1.89 | 1.97x10 <sup>-3</sup> | -0.52    | 8.20  | 0.96 | -6.12       | -10.62       | -2.12        | -0.22                                  | 0.37 | 0.66 | 1.20                     | 2  | 0.55 | 0.84                          | 1.00 | 0.36 | NA          | 0.93           |
| Brain Frontal Cortex BA9              | 3          | -10.57 | 1.67 | 2.38x10 <sup>-10</sup> | -10.43          | 1.84 | 1.53x10 <sup>-8</sup> | -17.19   | 8.20  | 0.28 | -10.56      | -13.83       | -7.30        | 0.31                                   | 0.38 | 0.56 | 1.02                     | 2  | 0.60 | 0.34                          | 1.00 | 0.56 | NA          | 0.93           |
| <b>cg06809326 -&gt; CCDC144NL-AS1</b> |            |        |      |                        |                 |      |                       |          |       |      |             |              |              |                                        |      |      |                          |    |      |                               |      |      |             |                |
| Brain Cortex                          | 3          | -2.97  | 1.26 | 1.85x10 <sup>-2</sup>  | -3.24           | 1.30 | 1.23x10 <sup>-2</sup> | -3.16    | 6.04  | 0.69 | -3.36       | -6.14        | 1.50         | 0.01                                   | 0.27 | 0.98 | 0.67                     | 2  | 0.72 | 0.67                          | 1.00 | 0.41 | NA          | 0.93           |
| Brain Caudate basal ganglia           | 3          | -6.62  | 2.24 | 3.07x10 <sup>-3</sup>  | -6.44           | 1.74 | 2.08x10 <sup>-4</sup> | -15.19   | 12.66 | 0.44 | -8.92       | -12.74       | 1.86         | 0.40                                   | 0.58 | 0.61 | 4.06                     | 2  | 0.13 | 2.75                          | 1.00 | 0.10 | NA          | 0.93           |
| Brain Cerebellum                      | 3          | -8.58  | 1.85 | 3.73x10 <sup>-6</sup>  | -8.92           | 1.75 | 3.61x10 <sup>-7</sup> | -19.67   | 7.47  | 0.23 | -9.87       | -13.31       | -5.86        | 0.52                                   | 0.34 | 0.37 | 2.87                     | 2  | 0.24 | 0.57                          | 1.00 | 0.45 | 274.82      | 0.93           |
| Brain Cerebellar Hemisphere           | 3          | -5.72  | 2.44 | 1.93x10 <sup>-2</sup>  | -7.00           | 1.87 | 1.81x10 <sup>-4</sup> | 0.85     | 15.31 | 0.96 | -7.23       | -10.77       | -3.68        | -0.31                                  | 0.70 | 0.74 | 4.36                     | 2  | 0.11 | 3.65                          | 1.00 | 0.06 | 274.82      | 0.93           |
| Brain Frontal Cortex                  | 3          | -5.73  | 1.27 | 6.55x10 <sup>-6</sup>  | -5.71           | 1.34 | 2.09x10 <sup>-5</sup> | -4.80    | 6.10  | 0.58 | -5.73       | -8.21        | -3.24        | -0.04                                  | 0.28 | 0.90 | 0.03                     | 2  | 0.98 | 0.01                          | 1.00 | 0.94 | 274.82      | 0.93           |
| <b>Step 2</b>                         |            |        |      |                        |                 |      |                       |          |       |      |             |              |              |                                        |      |      |                          |    |      |                               |      |      |             |                |
| <b>CCDC144NL -&gt; WMH burden</b>     |            |        |      |                        |                 |      |                       |          |       |      |             |              |              |                                        |      |      |                          |    |      |                               |      |      |             |                |
| Brain Caudate basal ganglia           | 1          | -0.03  | 0.02 | 3.94x10 <sup>-2</sup>  |                 |      |                       |          |       |      |             |              |              |                                        |      |      |                          |    |      |                               |      |      |             |                |
| Brain Cerebellum                      | 1          | -0.02  | 0.02 | 0.28                   |                 |      |                       |          |       |      |             |              |              |                                        |      |      |                          |    |      |                               |      |      |             |                |
| Brain Cortex                          | 1          | -0.03  | 0.02 | 4.28x10 <sup>-2</sup>  |                 |      |                       |          |       |      |             |              |              |                                        |      |      |                          |    |      |                               |      |      |             |                |
| Brain Frontal Cortex BA9              | 1          | -0.02  | 0.02 | 0.28                   |                 |      |                       |          |       |      |             |              |              |                                        |      |      |                          |    |      |                               |      |      |             |                |
| <b>CCDC144NL-AS1 -&gt; WMH burden</b> |            |        |      |                        |                 |      |                       |          |       |      |             |              |              |                                        |      |      |                          |    |      |                               |      |      |             |                |
| Brain Frontal Cortex BA9              | 1          | 0.01   | 0.02 | 0.579                  |                 |      |                       |          |       |      |             |              |              |                                        |      |      |                          |    |      |                               |      |      |             |                |
| Brain Caudate basal ganglia           | 1          | 0.01   | 0.01 | 0.579                  |                 |      |                       |          |       |      |             |              |              |                                        |      |      |                          |    |      |                               |      |      |             |                |

CI: confidence interval, I<sup>2</sup>: Bowden statistic of instrument strength for the MR-Egger method. IVW: inverse variance-weighted, meanF: instrument strength for IVW method. No.IV: Number of instrumental variables (IVs) included. OR: Odds ratio, PMR and Beta (S.E.): P value, effect size (beta) and its standard error (se) for the causal direction, primarily based on the IVW method, or in existence of pleiotropy (Ppleiotropy <0.05) based on MR Egger method. Ppleiotropy: P value estimated from MR Egger intercept pleiotropy test, WMH: white matter hyperintensities.

**Supplementary Table 15 CpG-WMH burden associations pooled at GWAS loci**

| <b>GWAS Locus</b> | <b>GWAS Gene</b> | <b>No. CpGs</b> | <b>Stat</b> | <b>P</b> |
|-------------------|------------------|-----------------|-------------|----------|
| 10q24.33          | <i>SH3PXD2A</i>  | 87              | 66.52       | 8.48E-03 |
| 16q12.1           | <i>SALL1</i>     | 45              | 21.92       | 0.10     |
| 14q22.1           | <i>NID2</i>      | 28              | 31.85       | 0.19     |
| 13q34             | <i>COL4A2</i>    | 142             | 46.53       | 0.20     |
| 22q12.1           | <i>MNI</i>       | 22              | 27.68       | 0.23     |
| 15q22.31          | <i>RASL12</i>    | 10              | 13.35       | 0.27     |
| 8p23.1            | <i>XKR6</i>      | 94              | 48.65       | 0.28     |
| 14q32.11          | <i>CCDC88C</i>   | 85              | 50.27       | 0.28     |
| 2q32.1            | <i>CALCRL</i>    | 5               | 7.64        | 0.34     |
| 17q21.31          | <i>NMT1</i>      | 25              | 19.22       | 0.39     |
| 1p22.2            | <i>PKN2</i>      | 17              | 15.57       | 0.40     |
| 2p21              | <i>HAAO</i>      | 16              | 12.53       | 0.42     |
| 5q14.2            | <i>VCAN</i>      | 30              | 22.39       | 0.42     |
| 3q27.1            | <i>KLHL24</i>    | 15              | 15.87       | 0.51     |
| 1q41              | <i>KCNK2</i>     | 29              | 13.83       | 0.53     |
| 8p23.1            | <i>TNKS</i>      | 27              | 17.07       | 0.58     |
| 2p16.1            | <i>EFEMP1</i>    | 21              | 11.28       | 0.58     |
| 10p14             | <i>ECHDC3</i>    | 20              | 10.64       | 0.60     |
| 14q32.2           | <i>DEGS2</i>     | 27              | 23.21       | 0.66     |
| 6q25.1            | <i>PLEKHG1</i>   | 27              | 18.94       | 0.74     |
| 17q25.1           | <i>TRIM65</i>    | 18              | 12.14       | 0.86     |

No. CpGs: number of CpGs pooled at the locus. Stat and P are from a generalized Fisher's test that computes pooled P values based on a Satterthwaite approximation adjusted for the dependence among tests

**Supplementary Table 16 Multiple-trait colocalization of brain omics and white matter hyperintensities at the genome-wide association study loci<sup>a</sup>**

| DNAm                      | Discovery EWAS Statistics |          | nsp | PPA  | PPB  | PPAB | PPC  | PPAC | PPBC | PPFC | SNP with the best PP* |
|---------------------------|---------------------------|----------|-----|------|------|------|------|------|------|------|-----------------------|
|                           | Z                         | P        |     |      |      |      |      |      |      |      |                       |
| <b>CALCR1 (2q32.1)</b>    |                           |          |     |      |      |      |      |      |      |      |                       |
| cg22374415                | -0.83                     | 0.41     | 259 | 0.98 | 0.95 | 0.95 | 0.89 | 0.89 | 0.86 | 0.86 | rs13417165            |
| cg16628093                | 0.56                      | 0.57     | 179 | 0.99 | 0.97 | 0.97 | 0.89 | 0.89 | 0.87 | 0.87 | rs1355520             |
| cg21350115                | -0.27                     | 0.79     | 184 | 0.99 | 0.99 | 0.99 | 0.90 | 0.90 | 0.89 | 0.89 | rs8176583             |
| cg00449067                | -0.78                     | 0.44     | 181 | 1.00 | 0.99 | 0.99 | 0.90 | 0.90 | 0.89 | 0.89 | rs1355520             |
| <b>CCDC88C (14q32.11)</b> |                           |          |     |      |      |      |      |      |      |      |                       |
| cg10928544                | -0.10                     | 0.92     | 239 | 1.00 | 0.90 | 0.90 | 1.00 | 1.00 | 0.90 | 0.90 | rs1285847             |
| cg26120073                | 0.63                      | 0.53     | 223 | 1.00 | 0.90 | 0.90 | 1.00 | 1.00 | 0.90 | 0.90 | rs1285847             |
| cg12937580                | 0.42                      | 0.68     | 239 | 1.00 | 0.90 | 0.90 | 1.00 | 1.00 | 0.90 | 0.90 | rs1285847             |
| cg03946034                | 0.51                      | 0.61     | 258 | 1.00 | 0.90 | 0.90 | 1.00 | 1.00 | 0.90 | 0.90 | rs1285847             |
| cg16505891                | 1.59                      | 0.11     | 224 | 1.00 | 0.91 | 0.91 | 1.00 | 1.00 | 0.91 | 0.91 | rs1285847             |
| cg13027206                | 1.82                      | 0.07     | 251 | 1.00 | 0.91 | 0.91 | 1.00 | 1.00 | 0.91 | 0.91 | rs1285847             |
| cg14214797                | 0.74                      | 0.46     | 226 | 1.00 | 0.91 | 0.91 | 1.00 | 1.00 | 0.91 | 0.91 | rs1285847             |
| cg15944026                | 1.04                      | 0.30     | 262 | 1.00 | 0.91 | 0.91 | 1.00 | 1.00 | 0.91 | 0.91 | rs1285847             |
| cg20303561                | -0.60                     | 0.55     | 265 | 1.00 | 0.91 | 0.91 | 1.00 | 1.00 | 0.91 | 0.91 | rs1285847             |
| cg20272146                | 0.14                      | 0.89     | 253 | 1.00 | 0.92 | 0.92 | 1.00 | 1.00 | 0.92 | 0.92 | rs1285847             |
| cg10755375                | -0.09                     | 0.93     | 261 | 1.00 | 0.92 | 0.92 | 1.00 | 1.00 | 0.92 | 0.92 | rs1285847             |
| cg26259944                | -1.96                     | 4.98E-02 | 229 | 1.00 | 0.92 | 0.92 | 1.00 | 1.00 | 0.92 | 0.92 | rs1285847             |
| cg16438210                | 0.26                      | 0.80     | 258 | 1.00 | 0.92 | 0.92 | 1.00 | 1.00 | 0.92 | 0.92 | rs1285847             |
| cg26290716                | 1.67                      | 0.10     | 239 | 1.00 | 0.93 | 0.93 | 1.00 | 1.00 | 0.93 | 0.93 | rs1285847             |
| cg14415844                | 0.68                      | 0.50     | 259 | 1.00 | 0.93 | 0.93 | 1.00 | 1.00 | 0.93 | 0.93 | rs1285847             |
| cg23304605                | 2.04                      | 4.13E-02 | 251 | 1.00 | 0.94 | 0.94 | 1.00 | 1.00 | 0.94 | 0.94 | rs1285847             |
| cg07112604                | 0.59                      | 0.56     | 229 | 1.00 | 0.94 | 0.94 | 1.00 | 1.00 | 0.94 | 0.94 | rs1285847             |
| cg10564112                | -0.76                     | 0.45     | 223 | 1.00 | 0.98 | 0.98 | 1.00 | 1.00 | 0.98 | 0.98 | rs1285847             |
| cg08017547                | 1.64                      | 0.10     | 262 | 1.00 | 1.00 | 1.00 | 1.00 | 1.00 | 1.00 | 1.00 | rs1285847             |
| cg23615483                | 0.56                      | 0.58     | 253 | 1.00 | 1.00 | 1.00 | 1.00 | 1.00 | 1.00 | 1.00 | rs1285847             |
| cg27663123                | 0.57                      | 0.57     | 226 | 1.00 | 1.00 | 1.00 | 1.00 | 1.00 | 1.00 | 1.00 | rs1285841             |
| cg05260886                | -0.01                     | 0.99     | 226 | 1.00 | 1.00 | 1.00 | 1.00 | 1.00 | 1.00 | 1.00 | rs1285847             |
| cg09003057                | 0.19                      | 0.85     | 227 | 1.00 | 1.00 | 1.00 | 1.00 | 1.00 | 1.00 | 1.00 | rs1285847             |
| <b>COL4A2 (13q34)</b>     |                           |          |     |      |      |      |      |      |      |      |                       |
| cg13153710                | 0.20                      | 0.84     | 426 | 0.83 | 0.77 | 0.77 | 0.76 | 0.76 | 0.70 | 0.70 | rs55940034            |
| cg13672379                | 0.10                      | 0.92     | 212 | 0.84 | 0.78 | 0.78 | 0.77 | 0.77 | 0.71 | 0.71 | rs55940034            |
| cg06651838                | -0.92                     | 0.36     | 305 | 0.84 | 0.78 | 0.78 | 0.77 | 0.77 | 0.71 | 0.71 | rs55940034            |
| cg15374000                | -1.05                     | 0.30     | 203 | 0.79 | 0.93 | 0.79 | 0.85 | 0.71 | 0.85 | 0.71 | rs9583484             |
| cg03469869                | -2.09                     | 3.69E-02 | 176 | 0.85 | 0.79 | 0.79 | 0.77 | 0.77 | 0.72 | 0.72 | rs55940034            |
| cg03482866                | 0.48                      | 0.63     | 274 | 0.85 | 0.79 | 0.79 | 0.77 | 0.77 | 0.72 | 0.72 | rs55940034            |
| cg22051925                | 0.82                      | 0.41     | 384 | 0.85 | 0.79 | 0.79 | 0.78 | 0.78 | 0.72 | 0.72 | rs55940034            |
| cg05167916                | 1.55                      | 0.12     | 390 | 0.85 | 0.80 | 0.80 | 0.78 | 0.78 | 0.72 | 0.72 | rs55940034            |
| cg23638556                | -0.46                     | 0.64     | 201 | 0.85 | 0.80 | 0.80 | 0.78 | 0.78 | 0.72 | 0.72 | rs55940034            |
| cg22942950                | -0.34                     | 0.73     | 426 | 0.86 | 0.81 | 0.81 | 0.79 | 0.79 | 0.73 | 0.73 | rs55940034            |
| cg06951647                | 1.75                      | 0.08     | 372 | 0.87 | 0.82 | 0.82 | 0.79 | 0.79 | 0.74 | 0.74 | rs55940034            |
| cg03528486                | -1.24                     | 0.22     | 453 | 0.89 | 0.84 | 0.84 | 0.81 | 0.81 | 0.77 | 0.77 | rs55940034            |
| cg03930369                | -1.15                     | 0.25     | 451 | 0.88 | 0.85 | 0.85 | 0.80 | 0.80 | 0.77 | 0.77 | rs55940034            |
| cg26384036                | 0.21                      | 0.84     | 374 | 0.89 | 0.86 | 0.86 | 0.82 | 0.82 | 0.78 | 0.78 | rs55940034            |
| cg09286253                | 0.36                      | 0.72     | 451 | 0.90 | 0.87 | 0.87 | 0.82 | 0.82 | 0.79 | 0.79 | rs55940034            |
| cg08318510                | 0.00                      | 1.00     | 204 | 0.86 | 0.96 | 0.86 | 0.90 | 0.80 | 0.90 | 0.80 | rs7991332             |
| cg11096515                | 1.91                      | 0.06     | 388 | 0.93 | 0.91 | 0.91 | 0.85 | 0.85 | 0.83 | 0.83 | rs55940034            |
| cg24283836                | -0.17                     | 0.86     | 390 | 0.94 | 0.91 | 0.91 | 0.85 | 0.85 | 0.83 | 0.83 | rs55940034            |
| cg15455643                | 0.65                      | 0.51     | 274 | 0.99 | 0.99 | 0.99 | 0.90 | 0.90 | 0.90 | 0.90 | rs11838776            |
| cg08959039                | 1.63                      | 0.10     | 388 | 1.00 | 1.00 | 1.00 | 0.91 | 0.90 | 0.91 | 0.90 | rs913397              |
| cg26053697                | 0.62                      | 0.53     | 274 | 1.00 | 1.00 | 1.00 | 0.91 | 0.91 | 0.91 | 0.91 | rs11838776            |
| cg22382805                | 0.37                      | 0.71     | 204 | 0.97 | 0.97 | 0.97 | 0.93 | 0.93 | 0.93 | 0.93 | rs9521686             |
| cg22232704                | 0.76                      | 0.45     | 204 | 0.97 | 0.97 | 0.97 | 0.94 | 0.94 | 0.94 | 0.94 | rs9521686             |
| <b>DEGS2 (14q32.2)</b>    |                           |          |     |      |      |      |      |      |      |      |                       |
| cg23426054                | 0.75                      | 0.45     | 209 | 0.86 | 0.78 | 0.78 | 0.82 | 0.82 | 0.74 | 0.74 | rs3783334             |
| cg23076361                | 1.21                      | 0.23     | 201 | 0.86 | 0.78 | 0.78 | 0.82 | 0.82 | 0.74 | 0.74 | rs3783334             |
| cg07530063                | -0.92                     | 0.36     | 209 | 0.86 | 0.78 | 0.78 | 0.82 | 0.82 | 0.74 | 0.74 | rs3783334             |
| cg25087487                | 0.32                      | 0.75     | 207 | 0.86 | 0.78 | 0.78 | 0.82 | 0.82 | 0.75 | 0.75 | rs3783334             |
| cg14290450                | -0.07                     | 0.94     | 206 | 0.86 | 0.78 | 0.78 | 0.82 | 0.82 | 0.75 | 0.75 | rs3783334             |
| cg21923884                | 0.24                      | 0.81     | 209 | 0.86 | 0.78 | 0.78 | 0.82 | 0.82 | 0.75 | 0.75 | rs3783334             |
| cg08307816                | -0.18                     | 0.86     | 207 | 0.86 | 0.78 | 0.78 | 0.82 | 0.82 | 0.75 | 0.75 | rs3783334             |
| cg21203643                | 0.19                      | 0.85     | 206 | 0.86 | 0.79 | 0.79 | 0.82 | 0.82 | 0.75 | 0.75 | rs3783334             |
| cg20036732                | 0.21                      | 0.83     | 207 | 0.86 | 0.79 | 0.79 | 0.82 | 0.82 | 0.75 | 0.75 | rs3783334             |
| cg04548002                | -0.19                     | 0.85     | 207 | 0.86 | 0.79 | 0.79 | 0.82 | 0.82 | 0.75 | 0.75 | rs3783334             |
| cg00992159                | 0.49                      | 0.62     | 206 | 0.86 | 0.79 | 0.79 | 0.83 | 0.83 | 0.75 | 0.75 | rs3783334             |
| cg16285701                | 0.40                      | 0.69     | 209 | 0.87 | 0.79 | 0.79 | 0.83 | 0.83 | 0.75 | 0.75 | rs3783334             |

| DNAm                   | Discovery EWAS Statistics |          | nsp | PPA  | PPB  | PPAB | PPC  | PPAC | PPBC | PPFC | SNP with the best PP* |
|------------------------|---------------------------|----------|-----|------|------|------|------|------|------|------|-----------------------|
|                        | Z                         | P        |     |      |      |      |      |      |      |      |                       |
| cg09258240             | -2.16                     | 3.07E-02 | 210 | 0.87 | 0.79 | 0.79 | 0.83 | 0.83 | 0.75 | 0.75 | rs3783334             |
| cg01768697             | 0.06                      | 0.95     | 209 | 0.87 | 0.79 | 0.79 | 0.83 | 0.83 | 0.76 | 0.76 | rs3783334             |
| cg08180525             | 0.05                      | 0.96     | 206 | 0.87 | 0.80 | 0.80 | 0.83 | 0.83 | 0.76 | 0.76 | rs3783334             |
| cg05129951             | 0.17                      | 0.87     | 207 | 0.87 | 0.80 | 0.80 | 0.83 | 0.83 | 0.76 | 0.76 | rs3783334             |
| cg12059866             | -0.07                     | 0.94     | 200 | 0.87 | 0.80 | 0.80 | 0.83 | 0.83 | 0.76 | 0.76 | rs3783334             |
| cg00890257             | -0.46                     | 0.64     | 209 | 0.88 | 0.82 | 0.82 | 0.84 | 0.84 | 0.78 | 0.78 | rs3783334             |
| cg09911485             | 0.18                      | 0.85     | 206 | 0.89 | 0.83 | 0.83 | 0.85 | 0.85 | 0.79 | 0.79 | rs3783334             |
| cg01607727             | -1.58                     | 0.11     | 206 | 0.91 | 0.86 | 0.86 | 0.87 | 0.87 | 0.82 | 0.82 | rs3783334             |
| cg01513978             | 0.66                      | 0.51     | 207 | 0.92 | 0.89 | 0.88 | 0.88 | 0.88 | 0.84 | 0.84 | rs3783334             |
| cg04755365             | 0.64                      | 0.52     | 208 | 0.93 | 0.89 | 0.89 | 0.89 | 0.89 | 0.85 | 0.85 | rs3783334             |
| cg01974091             | 1.05                      | 0.29     | 208 | 1.00 | 1.00 | 1.00 | 0.95 | 0.95 | 0.95 | 0.95 | rs7157984             |
| cg26002632             | 0.92                      | 0.36     | 208 | 1.00 | 1.00 | 1.00 | 0.95 | 0.95 | 0.95 | 0.95 | rs7157984             |
| cg18485215             | 0.94                      | 0.35     | 208 | 1.00 | 1.00 | 1.00 | 0.95 | 0.95 | 0.95 | 0.95 | rs7157984             |
| <b>ECHDC3 (10p14)</b>  |                           |          |     |      |      |      |      |      |      |      |                       |
| cg07469647             | -0.32                     | 0.75     | 280 | 0.71 | 0.99 | 0.71 | 0.99 | 0.71 | 0.99 | 0.71 | rs11257331            |
| cg16944070             | -1.73                     | 0.08     | 295 | 0.75 | 1.00 | 0.75 | 1.00 | 0.75 | 1.00 | 0.75 | rs718641              |
| cg11103390             | -1.23                     | 0.22     | 297 | 0.77 | 1.00 | 0.77 | 1.00 | 0.77 | 1.00 | 0.77 | rs55790558            |
| cg05991820             | -1.49                     | 0.14     | 301 | 0.77 | 1.00 | 0.77 | 1.00 | 0.77 | 1.00 | 0.77 | rs55790558            |
| cg14032732             | 0.51                      | 0.61     | 297 | 0.84 | 1.00 | 0.84 | 1.00 | 0.84 | 1.00 | 0.84 | rs3750693             |
| cg00673251             | 1.21                      | 0.23     | 296 | 0.85 | 0.97 | 0.85 | 0.97 | 0.85 | 0.96 | 0.85 | rs11257315            |
| cg10543363             | -0.79                     | 0.43     | 296 | 0.88 | 1.00 | 0.88 | 1.00 | 0.88 | 1.00 | 0.88 | rs11257293            |
| cg23960723             | -0.81                     | 0.42     | 295 | 0.89 | 1.00 | 0.89 | 1.00 | 0.89 | 1.00 | 0.89 | rs11257293            |
| cg17782954             | -0.73                     | 0.47     | 295 | 0.91 | 0.99 | 0.91 | 0.97 | 0.89 | 0.97 | 0.89 | rs10795884            |
| <b>EFEMP1 (2p16.1)</b> |                           |          |     |      |      |      |      |      |      |      |                       |
| cg25968367             | 1.86                      | 0.06     | 291 | 0.99 | 0.90 | 0.90 | 0.98 | 0.98 | 0.89 | 0.89 | rs7596872             |
| cg25412594             | -0.28                     | 0.78     | 291 | 0.99 | 0.90 | 0.90 | 0.98 | 0.98 | 0.89 | 0.89 | rs7596872             |
| cg16118212             | 0.53                      | 0.60     | 292 | 0.99 | 0.90 | 0.90 | 0.98 | 0.98 | 0.89 | 0.89 | rs7596872             |
| cg05140065             | 0.09                      | 0.93     | 276 | 0.99 | 0.90 | 0.90 | 0.98 | 0.98 | 0.89 | 0.89 | rs7596872             |
| cg03817671             | 1.00                      | 0.32     | 292 | 0.99 | 0.90 | 0.90 | 0.98 | 0.98 | 0.89 | 0.89 | rs7596872             |
| cg16947612             | -0.09                     | 0.93     | 294 | 0.99 | 0.90 | 0.90 | 0.98 | 0.98 | 0.89 | 0.89 | rs7596872             |
| cg16100120             | -0.10                     | 0.92     | 291 | 0.99 | 0.90 | 0.90 | 0.98 | 0.98 | 0.89 | 0.89 | rs7596872             |
| cg23260993             | 0.26                      | 0.80     | 288 | 0.99 | 0.91 | 0.91 | 0.98 | 0.98 | 0.90 | 0.90 | rs7596872             |
| cg08130988             | 1.13                      | 0.26     | 292 | 0.99 | 0.92 | 0.92 | 0.98 | 0.98 | 0.91 | 0.91 | rs7596872             |
| cg20052010             | 1.04                      | 0.30     | 290 | 1.00 | 0.92 | 0.92 | 0.98 | 0.98 | 0.91 | 0.91 | rs7596872             |
| cg25046074             | 1.79                      | 0.07     | 291 | 1.00 | 0.93 | 0.93 | 0.98 | 0.98 | 0.92 | 0.92 | rs7596872             |
| cg05385513             | -0.44                     | 0.66     | 291 | 1.00 | 0.94 | 0.94 | 0.98 | 0.98 | 0.93 | 0.93 | rs7596872             |
| cg02626897             | -0.45                     | 0.65     | 265 | 1.00 | 0.95 | 0.95 | 0.99 | 0.99 | 0.94 | 0.94 | rs7596872             |
| cg20786074             | -2.11                     | 3.48E-02 | 290 | 1.00 | 0.95 | 0.95 | 0.98 | 0.98 | 0.94 | 0.94 | rs7596872             |
| cg25711779             | 0.14                      | 0.89     | 290 | 1.00 | 0.95 | 0.95 | 0.98 | 0.98 | 0.94 | 0.94 | rs7596872             |
| cg00574639             | -0.09                     | 0.93     | 283 | 1.00 | 0.99 | 0.99 | 0.99 | 0.99 | 0.97 | 0.97 | rs7596872             |
| cg03122624             | -0.50                     | 0.62     | 290 | 1.00 | 0.99 | 0.99 | 0.99 | 0.99 | 0.98 | 0.98 | rs7596872             |
| cg25268863             | -0.09                     | 0.93     | 281 | 1.00 | 1.00 | 1.00 | 0.99 | 0.99 | 0.99 | 0.99 | rs7596872             |
| <b>HAAO (2p21)</b>     |                           |          |     |      |      |      |      |      |      |      |                       |
| cg06913600             | 0.88                      | 0.38     | 309 | 0.78 | 0.97 | 0.77 | 0.96 | 0.77 | 0.96 | 0.76 | rs57082399            |
| cg09256201             | 0.47                      | 0.64     | 307 | 0.83 | 0.87 | 0.82 | 0.86 | 0.80 | 0.84 | 0.79 | rs1347931             |
| cg01561916             | 2.23                      | 2.55E-02 | 309 | 0.94 | 1.00 | 0.94 | 0.98 | 0.93 | 0.98 | 0.92 | rs893729              |
| cg09368936             | 1.00                      | 0.32     | 307 | 0.94 | 1.00 | 0.94 | 0.98 | 0.93 | 0.98 | 0.93 | rs7422835             |
| cg27299406             | -1.21                     | 0.23     | 309 | 0.94 | 1.00 | 0.94 | 0.98 | 0.93 | 0.98 | 0.93 | rs7422835             |
| cg08421126             | 0.54                      | 0.59     | 308 | 0.94 | 1.00 | 0.94 | 0.98 | 0.93 | 0.98 | 0.93 | rs7422835             |
| cg20289949             | -0.68                     | 0.49     | 307 | 0.94 | 1.00 | 0.94 | 0.98 | 0.93 | 0.98 | 0.93 | rs7422835             |
| cg09480054             | -0.10                     | 0.92     | 310 | 0.94 | 1.00 | 0.94 | 0.98 | 0.93 | 0.98 | 0.93 | rs7422835             |
| cg17246140             | 0.04                      | 0.97     | 309 | 0.94 | 1.00 | 0.94 | 0.98 | 0.93 | 0.98 | 0.93 | rs7422835             |
| cg20857709             | 1.03                      | 0.30     | 307 | 0.94 | 1.00 | 0.94 | 0.98 | 0.93 | 0.98 | 0.93 | rs7422835             |
| cg05986933             | 1.56                      | 0.12     | 309 | 0.94 | 1.00 | 0.94 | 0.98 | 0.93 | 0.98 | 0.93 | rs7422835             |
| <b>KLHL24 (3q27.1)</b> |                           |          |     |      |      |      |      |      |      |      |                       |
| cg02021337             | -0.59                     | 0.55     | 208 | 1.00 | 0.90 | 0.90 | 1.00 | 1.00 | 0.90 | 0.90 | rs1983386             |
| cg11237115             | -0.82                     | 0.41     | 242 | 1.00 | 0.90 | 0.90 | 1.00 | 1.00 | 0.90 | 0.90 | rs1983386             |
| cg24399556             | 0.35                      | 0.72     | 243 | 1.00 | 0.90 | 0.90 | 1.00 | 1.00 | 0.90 | 0.90 | rs1983386             |
| cg15803765             | 1.70                      | 0.09     | 245 | 1.00 | 0.90 | 0.90 | 1.00 | 1.00 | 0.90 | 0.90 | rs1983386             |
| cg22757384             | 0.06                      | 0.95     | 244 | 1.00 | 0.91 | 0.91 | 1.00 | 1.00 | 0.91 | 0.91 | rs1983386             |
| cg00892804             | -0.70                     | 0.49     | 243 | 1.00 | 0.91 | 0.91 | 1.00 | 1.00 | 0.91 | 0.91 | rs1983386             |
| cg27197504             | -0.03                     | 0.98     | 246 | 1.00 | 0.91 | 0.91 | 1.00 | 1.00 | 0.91 | 0.91 | rs1983386             |
| cg10143433             | 1.08                      | 0.28     | 243 | 1.00 | 0.91 | 0.91 | 1.00 | 1.00 | 0.91 | 0.91 | rs1983386             |
| cg05197962             | 0.01                      | 0.99     | 242 | 1.00 | 0.91 | 0.91 | 1.00 | 1.00 | 0.91 | 0.91 | rs1983386             |
| cg07482199             | -2.15                     | 3.13E-02 | 243 | 1.00 | 0.91 | 0.91 | 1.00 | 1.00 | 0.91 | 0.91 | rs1983386             |
| cg02628016             | -0.80                     | 0.43     | 228 | 1.00 | 0.92 | 0.92 | 1.00 | 1.00 | 0.92 | 0.92 | rs1983386             |
| cg06375534             | 0.51                      | 0.61     | 243 | 1.00 | 0.92 | 0.92 | 1.00 | 1.00 | 0.92 | 0.92 | rs1983386             |
| cg03030002             | -0.21                     | 0.83     | 243 | 1.00 | 0.93 | 0.93 | 1.00 | 1.00 | 0.93 | 0.93 | rs1983386             |
| cg12198633             | 1.00                      | 0.32     | 234 | 1.00 | 0.94 | 0.94 | 1.00 | 1.00 | 0.94 | 0.94 | rs1983386             |

| DNAm                       | Discovery EWAS Statistics |          | nsp | PPA  | PPB  | PPAB | PPC  | PPAC | PPBC | PPFC | SNP with the best PP* |
|----------------------------|---------------------------|----------|-----|------|------|------|------|------|------|------|-----------------------|
|                            | Z                         | P        |     |      |      |      |      |      |      |      |                       |
| cg03895159                 | -1.42                     | 0.16     | 242 | 1.00 | 1.00 | 1.00 | 1.00 | 1.00 | 1.00 | 1.00 | rs1983386             |
| <b>NID2 (14q22.1)</b>      |                           |          |     |      |      |      |      |      |      |      |                       |
| cg10843707                 | -0.28                     | 0.78     | 388 | 0.96 | 0.97 | 0.96 | 0.88 | 0.87 | 0.88 | 0.87 | rs2645738             |
| <b>NMT1 (17q21.31)</b>     |                           |          |     |      |      |      |      |      |      |      |                       |
| cg24354954                 | -0.06                     | 0.95     | 256 | 0.99 | 0.90 | 0.90 | 0.98 | 0.98 | 0.89 | 0.89 | rs6503417             |
| cg02077631                 | 0.89                      | 0.38     | 256 | 0.99 | 0.90 | 0.90 | 0.98 | 0.98 | 0.89 | 0.89 | rs6503417             |
| cg21452443                 | -0.23                     | 0.82     | 256 | 0.99 | 0.90 | 0.90 | 0.98 | 0.98 | 0.89 | 0.89 | rs6503417             |
| cg21132931                 | 0.49                      | 0.63     | 256 | 0.99 | 0.90 | 0.90 | 0.98 | 0.98 | 0.89 | 0.89 | rs6503417             |
| cg05322982                 | -0.10                     | 0.92     | 226 | 0.99 | 0.90 | 0.90 | 0.98 | 0.98 | 0.89 | 0.89 | rs6503417             |
| cg07481784                 | 0.03                      | 0.98     | 256 | 0.99 | 0.90 | 0.90 | 0.98 | 0.98 | 0.89 | 0.89 | rs6503417             |
| cg10755730                 | -0.29                     | 0.77     | 256 | 0.99 | 0.90 | 0.90 | 0.98 | 0.98 | 0.89 | 0.89 | rs6503417             |
| cg04013970                 | 0.32                      | 0.75     | 260 | 0.99 | 0.90 | 0.90 | 0.98 | 0.98 | 0.89 | 0.89 | rs6503417             |
| cg21554013                 | -0.47                     | 0.64     | 256 | 0.99 | 0.90 | 0.90 | 0.98 | 0.98 | 0.89 | 0.89 | rs6503417             |
| cg09377882                 | -1.08                     | 0.28     | 256 | 0.99 | 0.90 | 0.90 | 0.98 | 0.98 | 0.89 | 0.89 | rs6503417             |
| cg09214551                 | -1.47                     | 0.14     | 258 | 0.99 | 0.90 | 0.90 | 0.98 | 0.98 | 0.89 | 0.89 | rs6503417             |
| cg22356484                 | 0.15                      | 0.88     | 256 | 0.99 | 0.90 | 0.90 | 0.98 | 0.98 | 0.89 | 0.89 | rs6503417             |
| cg00405568                 | -0.53                     | 0.59     | 256 | 0.99 | 0.90 | 0.90 | 0.98 | 0.98 | 0.89 | 0.89 | rs6503417             |
| cg03287877                 | -2.92                     | 3.52E-03 | 258 | 1.00 | 0.92 | 0.92 | 0.98 | 0.98 | 0.91 | 0.91 | rs6503417             |
| cg16594296                 | 0.25                      | 0.80     | 257 | 1.00 | 0.93 | 0.93 | 0.99 | 0.99 | 0.92 | 0.92 | rs6503417             |
| cg16080654                 | -1.58                     | 0.11     | 238 | 1.00 | 0.96 | 0.96 | 0.99 | 0.99 | 0.94 | 0.94 | rs6503417             |
| cg02888886                 | 0.62                      | 0.54     | 252 | 1.00 | 0.96 | 0.96 | 0.99 | 0.99 | 0.95 | 0.95 | rs6503417             |
| cg05349016                 | -0.72                     | 0.47     | 251 | 1.00 | 0.97 | 0.97 | 0.99 | 0.99 | 0.96 | 0.96 | rs6503417             |
| cg11583751                 | 1.30                      | 0.19     | 233 | 1.00 | 0.97 | 0.97 | 0.99 | 0.99 | 0.96 | 0.96 | rs6503417             |
| cg08860622                 | 1.09                      | 0.27     | 257 | 1.00 | 0.98 | 0.98 | 0.99 | 0.99 | 0.97 | 0.97 | rs6503417             |
| <b>PLEKHG1 (6q25.1)</b>    |                           |          |     |      |      |      |      |      |      |      |                       |
| cg07468752                 | -0.08                     | 0.94     | 333 | 0.98 | 0.89 | 0.89 | 0.93 | 0.93 | 0.84 | 0.84 | rs6940540             |
| cg26852242                 | 0.04                      | 0.97     | 366 | 0.98 | 0.89 | 0.89 | 0.93 | 0.93 | 0.84 | 0.84 | rs6940540             |
| cg08560465                 | 0.27                      | 0.79     | 334 | 0.98 | 0.89 | 0.89 | 0.93 | 0.93 | 0.85 | 0.85 | rs6940540             |
| cg16540391                 | 0.34                      | 0.73     | 363 | 0.98 | 0.90 | 0.90 | 0.93 | 0.93 | 0.85 | 0.85 | rs6940540             |
| cg00183067                 | -2.18                     | 2.92E-02 | 300 | 0.97 | 0.93 | 0.93 | 0.89 | 0.89 | 0.85 | 0.85 | rs4272224             |
| cg15622860                 | 1.22                      | 0.22     | 334 | 0.98 | 0.90 | 0.90 | 0.93 | 0.93 | 0.86 | 0.86 | rs6940540             |
| cg02784464                 | -0.40                     | 0.69     | 301 | 1.00 | 1.00 | 1.00 | 0.92 | 0.92 | 0.92 | 0.92 | rs2073061             |
| <b>RASL12 (15q22.31)</b>   |                           |          |     |      |      |      |      |      |      |      |                       |
| cg27356162                 | 1.62                      | 0.10     | 118 | 0.97 | 0.88 | 0.88 | 0.97 | 0.97 | 0.87 | 0.87 | rs12443113            |
| cg11267410                 | 1.36                      | 0.18     | 91  | 0.98 | 0.89 | 0.89 | 0.97 | 0.97 | 0.89 | 0.89 | rs12443113            |
| cg19592235                 | 0.00                      | 1.00     | 91  | 0.98 | 0.90 | 0.90 | 0.97 | 0.97 | 0.89 | 0.89 | rs12443113            |
| cg00397575                 | 1.19                      | 0.23     | 91  | 0.98 | 0.90 | 0.90 | 0.97 | 0.97 | 0.89 | 0.89 | rs12443113            |
| cg27522060                 | 0.82                      | 0.41     | 91  | 0.98 | 0.90 | 0.90 | 0.97 | 0.97 | 0.89 | 0.89 | rs12443113            |
| cg10604168                 | 1.10                      | 0.27     | 91  | 0.98 | 0.90 | 0.90 | 0.97 | 0.97 | 0.89 | 0.89 | rs12443113            |
| cg06192057                 | 0.42                      | 0.67     | 118 | 0.98 | 0.90 | 0.90 | 0.97 | 0.97 | 0.89 | 0.89 | rs12443113            |
| cg13754518                 | 1.70                      | 0.09     | 96  | 0.99 | 0.95 | 0.95 | 0.98 | 0.98 | 0.94 | 0.94 | rs12443113            |
| <b>SH3PXD2A (10q24.33)</b> |                           |          |     |      |      |      |      |      |      |      |                       |
| cg11385165                 | 0.14                      | 0.89     | 194 | 0.88 | 0.81 | 0.81 | 0.81 | 0.81 | 0.73 | 0.73 | rs12357919            |
| cg22603555                 | -1.06                     | 0.29     | 207 | 0.87 | 0.81 | 0.81 | 0.81 | 0.81 | 0.75 | 0.75 | rs7094488             |
| cg01380878                 | -1.44                     | 0.15     | 225 | 0.94 | 0.85 | 0.85 | 0.85 | 0.85 | 0.77 | 0.77 | rs71471298            |
| cg09926728                 | 1.29                      | 0.20     | 234 | 0.94 | 0.85 | 0.85 | 0.85 | 0.85 | 0.77 | 0.77 | rs71471298            |
| cg19189864                 | -1.33                     | 0.18     | 209 | 0.93 | 0.85 | 0.85 | 0.86 | 0.86 | 0.78 | 0.78 | rs61871257            |
| cg04762698                 | 1.69                      | 0.09     | 211 | 0.93 | 0.85 | 0.85 | 0.86 | 0.86 | 0.78 | 0.78 | rs61871257            |
| cg04426842                 | 1.10                      | 0.27     | 210 | 0.93 | 0.85 | 0.85 | 0.86 | 0.86 | 0.78 | 0.78 | rs61871257            |
| cg19056515                 | -1.51                     | 0.13     | 214 | 0.93 | 0.85 | 0.85 | 0.86 | 0.86 | 0.78 | 0.78 | rs61871257            |
| cg12094736                 | 0.03                      | 0.98     | 224 | 0.94 | 0.86 | 0.86 | 0.86 | 0.86 | 0.78 | 0.78 | rs10748849            |
| cg08728732                 | -0.61                     | 0.54     | 211 | 0.94 | 0.86 | 0.86 | 0.86 | 0.86 | 0.78 | 0.78 | rs61871257            |
| cg08740008                 | 0.85                      | 0.40     | 208 | 0.94 | 0.86 | 0.86 | 0.86 | 0.86 | 0.79 | 0.79 | rs61871257            |
| cg20241299                 | 0.76                      | 0.45     | 212 | 0.94 | 0.86 | 0.86 | 0.86 | 0.86 | 0.79 | 0.79 | rs61871257            |
| cg24989193                 | 0.48                      | 0.63     | 226 | 0.94 | 0.87 | 0.87 | 0.86 | 0.86 | 0.79 | 0.79 | rs10748849            |
| cg20669641                 | -2.05                     | 4.03E-02 | 183 | 0.96 | 0.87 | 0.87 | 0.88 | 0.88 | 0.79 | 0.79 | rs4630220             |
| cg19007269                 | -0.75                     | 0.46     | 175 | 0.96 | 0.87 | 0.87 | 0.88 | 0.88 | 0.79 | 0.79 | rs4630220             |
| cg13634090                 | -1.72                     | 0.09     | 176 | 0.96 | 0.87 | 0.87 | 0.88 | 0.88 | 0.79 | 0.79 | rs4630220             |
| cg04688330                 | 0.22                      | 0.83     | 171 | 0.96 | 0.87 | 0.87 | 0.88 | 0.88 | 0.79 | 0.79 | rs4630220             |
| cg19355009                 | 0.23                      | 0.82     | 175 | 0.96 | 0.87 | 0.87 | 0.88 | 0.88 | 0.80 | 0.80 | rs4630220             |
| cg01428849                 | -1.40                     | 0.16     | 183 | 0.96 | 0.87 | 0.87 | 0.88 | 0.88 | 0.80 | 0.80 | rs4630220             |
| cg02432295                 | -1.38                     | 0.17     | 178 | 0.96 | 0.87 | 0.87 | 0.88 | 0.88 | 0.80 | 0.80 | rs4630220             |
| cg02878913                 | 0.61                      | 0.55     | 178 | 0.96 | 0.87 | 0.87 | 0.88 | 0.88 | 0.80 | 0.80 | rs4630220             |
| cg16492615                 | 0.37                      | 0.72     | 186 | 0.96 | 0.88 | 0.88 | 0.88 | 0.88 | 0.80 | 0.80 | rs4630220             |
| cg14209793                 | 0.36                      | 0.72     | 223 | 0.96 | 0.87 | 0.87 | 0.88 | 0.88 | 0.80 | 0.80 | rs6584579             |
| cg00492979                 | -2.63                     | 8.66E-03 | 184 | 0.96 | 0.88 | 0.88 | 0.88 | 0.88 | 0.80 | 0.80 | rs4630220             |
| cg02089135                 | -0.02                     | 0.99     | 224 | 0.96 | 0.87 | 0.87 | 0.88 | 0.88 | 0.80 | 0.80 | rs6584579             |
| cg03958163                 | 1.83                      | 0.07     | 222 | 0.96 | 0.87 | 0.87 | 0.88 | 0.88 | 0.80 | 0.80 | rs6584579             |
| cg17167425                 | -0.91                     | 0.36     | 197 | 0.96 | 0.88 | 0.88 | 0.88 | 0.88 | 0.80 | 0.80 | rs4630220             |



| DNAm                    | Discovery EWAS Statistics |          | nsp | PPA  | PPB  | PPAB | PPC  | PPAC | PPBC | PPFC | SNP with the best PP* |
|-------------------------|---------------------------|----------|-----|------|------|------|------|------|------|------|-----------------------|
|                         | Z                         | P        |     |      |      |      |      |      |      |      |                       |
| cg23985995              | -0.44                     | 0.66     | 172 | 0.96 | 0.88 | 0.88 | 0.88 | 0.88 | 0.80 | 0.80 | rs4630220             |
| cg07291639              | -0.88                     | 0.38     | 186 | 0.96 | 0.88 | 0.88 | 0.88 | 0.88 | 0.80 | 0.80 | rs4630220             |
| cg05620165              | -2.34                     | 1.91E-02 | 219 | 0.96 | 0.88 | 0.88 | 0.88 | 0.88 | 0.80 | 0.80 | rs10786772            |
| cg09210519              | -1.55                     | 0.12     | 169 | 0.96 | 0.88 | 0.88 | 0.88 | 0.88 | 0.80 | 0.80 | rs4630220             |
| cg24060660              | -0.03                     | 0.98     | 185 | 0.96 | 0.88 | 0.88 | 0.88 | 0.88 | 0.80 | 0.80 | rs4630220             |
| cg22973172              | 0.19                      | 0.85     | 202 | 0.96 | 0.88 | 0.88 | 0.88 | 0.88 | 0.80 | 0.80 | rs4630220             |
| cg05352321              | -2.24                     | 2.50E-02 | 181 | 0.96 | 0.88 | 0.88 | 0.88 | 0.88 | 0.80 | 0.80 | rs3758575             |
| cg23461741              | 0.99                      | 0.32     | 225 | 0.95 | 0.89 | 0.89 | 0.87 | 0.87 | 0.80 | 0.80 | rs71471298            |
| cg07457213              | -0.85                     | 0.39     | 212 | 0.96 | 0.88 | 0.88 | 0.88 | 0.88 | 0.80 | 0.80 | rs4630220             |
| cg24911198              | -1.00                     | 0.32     | 168 | 0.96 | 0.88 | 0.88 | 0.88 | 0.88 | 0.80 | 0.80 | rs4630220             |
| cg19140548              | -3.41                     | 6.61E-04 | 233 | 0.96 | 0.88 | 0.88 | 0.88 | 0.88 | 0.80 | 0.80 | rs10883922            |
| cg04671329              | 0.82                      | 0.41     | 223 | 0.96 | 0.88 | 0.88 | 0.89 | 0.89 | 0.80 | 0.80 | rs6584579             |
| cg19726408              | -2.84                     | 4.56E-03 | 183 | 0.96 | 0.88 | 0.88 | 0.88 | 0.88 | 0.81 | 0.81 | rs4630220             |
| cg19120251              | -0.89                     | 0.37     | 222 | 0.96 | 0.88 | 0.88 | 0.89 | 0.89 | 0.81 | 0.81 | rs6584579             |
| cg11819799              | -0.59                     | 0.55     | 169 | 0.96 | 0.89 | 0.89 | 0.88 | 0.88 | 0.81 | 0.81 | rs4630220             |
| cg05359750              | -0.41                     | 0.68     | 213 | 0.95 | 0.89 | 0.89 | 0.87 | 0.87 | 0.81 | 0.81 | rs61871257            |
| cg12636499              | -0.19                     | 0.85     | 178 | 0.96 | 0.88 | 0.88 | 0.89 | 0.89 | 0.81 | 0.81 | rs3758575             |
| cg23901918              | -0.17                     | 0.87     | 175 | 0.96 | 0.89 | 0.89 | 0.88 | 0.88 | 0.81 | 0.81 | rs4630220             |
| cg23786152              | 1.01                      | 0.31     | 225 | 0.96 | 0.89 | 0.89 | 0.89 | 0.89 | 0.81 | 0.81 | rs6584579             |
| cg25181684              | -1.57                     | 0.12     | 165 | 0.96 | 0.89 | 0.89 | 0.88 | 0.88 | 0.81 | 0.81 | rs4630220             |
| cg05162794              | 0.20                      | 0.84     | 215 | 0.95 | 0.89 | 0.89 | 0.87 | 0.87 | 0.81 | 0.81 | rs61871257            |
| cg07168060              | -0.58                     | 0.56     | 226 | 0.96 | 0.89 | 0.89 | 0.89 | 0.89 | 0.81 | 0.81 | rs6584579             |
| cg16669339              | -2.59                     | 9.67E-03 | 183 | 0.97 | 0.90 | 0.90 | 0.89 | 0.89 | 0.82 | 0.82 | rs4630220             |
| cg12569119              | -0.68                     | 0.50     | 228 | 0.96 | 0.90 | 0.90 | 0.87 | 0.87 | 0.82 | 0.82 | rs71471298            |
| cg25866173              | 2.33                      | 2.01E-02 | 220 | 0.97 | 0.90 | 0.90 | 0.89 | 0.89 | 0.82 | 0.82 | rs6584579             |
| cg04388244              | -0.14                     | 0.89     | 175 | 0.97 | 0.90 | 0.90 | 0.89 | 0.89 | 0.82 | 0.82 | rs4630220             |
| cg11014810              | -1.03                     | 0.30     | 219 | 0.97 | 0.90 | 0.90 | 0.89 | 0.89 | 0.82 | 0.82 | rs10786772            |
| cg02722808              | -1.18                     | 0.24     | 227 | 0.97 | 0.91 | 0.91 | 0.89 | 0.89 | 0.83 | 0.83 | rs56093138            |
| cg10831642              | 0.81                      | 0.42     | 204 | 0.93 | 0.91 | 0.90 | 0.86 | 0.86 | 0.84 | 0.83 | rs7910092             |
| cg06966363              | 0.49                      | 0.62     | 185 | 0.96 | 0.92 | 0.92 | 0.88 | 0.88 | 0.83 | 0.83 | rs56134400            |
| cg01833196              | 0.41                      | 0.68     | 170 | 0.97 | 0.92 | 0.92 | 0.89 | 0.89 | 0.84 | 0.84 | rs4630220             |
| cg06276663              | 1.23                      | 0.22     | 224 | 0.97 | 0.92 | 0.92 | 0.89 | 0.89 | 0.84 | 0.84 | rs10786772            |
| cg06847424              | 0.61                      | 0.54     | 212 | 0.97 | 0.93 | 0.93 | 0.88 | 0.88 | 0.84 | 0.84 | rs61871257            |
| cg18675043              | 1.42                      | 0.16     | 170 | 0.98 | 0.93 | 0.93 | 0.89 | 0.89 | 0.85 | 0.85 | rs4630220             |
| cg18735015              | -3.12                     | 1.83E-03 | 184 | 0.98 | 0.93 | 0.93 | 0.89 | 0.89 | 0.85 | 0.85 | rs4630220             |
| cg06888746              | -1.42                     | 0.16     | 234 | 0.97 | 0.94 | 0.94 | 0.88 | 0.88 | 0.85 | 0.85 | rs10748849            |
| cg06620993              | 0.02                      | 0.98     | 175 | 0.98 | 0.94 | 0.94 | 0.90 | 0.90 | 0.85 | 0.85 | rs4630220             |
| cg13564061              | 0.18                      | 0.85     | 173 | 0.98 | 0.94 | 0.94 | 0.90 | 0.90 | 0.86 | 0.86 | rs4630220             |
| cg02818775              | -0.67                     | 0.50     | 213 | 0.98 | 0.95 | 0.95 | 0.89 | 0.89 | 0.87 | 0.87 | rs61871257            |
| cg00730670              | 0.33                      | 0.74     | 219 | 0.98 | 0.96 | 0.96 | 0.89 | 0.89 | 0.87 | 0.87 | rs71471298            |
| cg07709475              | -3.17                     | 1.53E-03 | 183 | 0.98 | 0.95 | 0.95 | 0.90 | 0.90 | 0.87 | 0.87 | rs4630220             |
| cg12477923              | -1.20                     | 0.23     | 216 | 0.98 | 0.96 | 0.96 | 0.89 | 0.89 | 0.87 | 0.87 | rs61871257            |
| cg10521450              | -0.27                     | 0.79     | 184 | 0.99 | 0.97 | 0.97 | 0.90 | 0.90 | 0.89 | 0.89 | rs4630220             |
| cg12312107              | -2.33                     | 1.97E-02 | 168 | 0.99 | 0.98 | 0.98 | 0.91 | 0.91 | 0.89 | 0.89 | rs4630220             |
| cg20668662              | -0.67                     | 0.51     | 170 | 1.00 | 0.98 | 0.98 | 0.91 | 0.91 | 0.90 | 0.90 | rs4630220             |
| cg09754828              | -1.88                     | 0.06     | 213 | 1.00 | 1.00 | 1.00 | 0.91 | 0.91 | 0.91 | 0.91 | rs61871257            |
| cg00126946              | -0.92                     | 0.36     | 213 | 1.00 | 1.00 | 1.00 | 0.91 | 0.91 | 0.91 | 0.91 | rs61871257            |
| cg04788957              | -0.57                     | 0.57     | 185 | 1.00 | 1.00 | 1.00 | 0.91 | 0.91 | 0.91 | 0.91 | rs12357919            |
| cg17683908              | 2.06                      | 3.93E-02 | 223 | 1.00 | 1.00 | 1.00 | 0.91 | 0.91 | 0.91 | 0.91 | rs56093138            |
| cg01727419              | 1.20                      | 0.23     | 220 | 1.00 | 1.00 | 1.00 | 0.91 | 0.91 | 0.91 | 0.91 | rs10786772            |
| cg07671776              | 1.80                      | 0.07     | 220 | 1.00 | 1.00 | 1.00 | 0.91 | 0.91 | 0.91 | 0.91 | rs6584579             |
| cg12800012              | -0.82                     | 0.41     | 222 | 1.00 | 1.00 | 1.00 | 0.92 | 0.92 | 0.92 | 0.92 | rs10883926            |
| cg00277384              | -1.60                     | 0.11     | 168 | 1.00 | 1.00 | 1.00 | 0.92 | 0.92 | 0.92 | 0.92 | rs3758575             |
| <b>TNKS (8p23.1)</b>    |                           |          |     |      |      |      |      |      |      |      |                       |
| cg23320011              | -1.32                     | 0.19     | 304 | 0.79 | 0.78 | 0.78 | 0.75 | 0.75 | 0.74 | 0.74 | rs7846399             |
| <b>TRIM65 (17q25.1)</b> |                           |          |     |      |      |      |      |      |      |      |                       |
| cg07879399              | 0.44                      | 0.66     | 178 | 1.00 | 0.90 | 0.90 | 0.99 | 0.99 | 0.90 | 0.90 | rs34974290            |
| cg27659478              | -1.80                     | 0.07     | 163 | 1.00 | 0.90 | 0.90 | 0.99 | 0.99 | 0.90 | 0.90 | rs34974290            |
| cg15238200              | 1.39                      | 0.16     | 165 | 1.00 | 0.90 | 0.90 | 0.99 | 0.99 | 0.90 | 0.90 | rs34974290            |
| cg26965547              | -0.79                     | 0.43     | 165 | 1.00 | 0.91 | 0.91 | 0.99 | 0.99 | 0.90 | 0.90 | rs34974290            |
| cg16087457              | -0.21                     | 0.84     | 164 | 1.00 | 0.91 | 0.91 | 0.99 | 0.99 | 0.90 | 0.90 | rs34974290            |
| cg13966383              | -0.43                     | 0.67     | 164 | 1.00 | 0.91 | 0.91 | 0.99 | 0.99 | 0.90 | 0.90 | rs34974290            |
| cg15945867              | 0.41                      | 0.69     | 176 | 1.00 | 0.91 | 0.91 | 0.99 | 0.99 | 0.91 | 0.91 | rs34974290            |
| cg19169246              | -0.75                     | 0.45     | 176 | 1.00 | 0.91 | 0.91 | 0.99 | 0.99 | 0.91 | 0.91 | rs34974290            |
| cg01453052              | -0.18                     | 0.86     | 161 | 1.00 | 0.91 | 0.91 | 0.99 | 0.99 | 0.91 | 0.91 | rs34974290            |
| cg24191285              | -0.44                     | 0.66     | 164 | 1.00 | 0.91 | 0.91 | 0.99 | 0.99 | 0.91 | 0.91 | rs34974290            |
| cg03648361              | -0.20                     | 0.84     | 162 | 1.00 | 0.91 | 0.91 | 0.99 | 0.99 | 0.91 | 0.91 | rs34974290            |
| cg26780705              | -0.68                     | 0.50     | 165 | 1.00 | 0.92 | 0.92 | 0.99 | 0.99 | 0.92 | 0.91 | rs34974290            |
| cg27576946              | -0.61                     | 0.54     | 164 | 1.00 | 0.93 | 0.93 | 0.99 | 0.99 | 0.92 | 0.92 | rs34974290            |

| DNAm                 | Discovery EWAS Statistics |          | nsp | PPA  | PPB  | PPAB | PPC  | PPAC | PPBC | PPFC | SNP with the best PP* |
|----------------------|---------------------------|----------|-----|------|------|------|------|------|------|------|-----------------------|
|                      | Z                         | P        |     |      |      |      |      |      |      |      |                       |
| cg10195415           | 0.67                      | 0.50     | 174 | 1.00 | 0.93 | 0.93 | 1.00 | 1.00 | 0.92 | 0.92 | <b>rs34974290</b>     |
| cg10927422           | 0.06                      | 0.95     | 174 | 1.00 | 0.99 | 0.99 | 1.00 | 1.00 | 0.99 | 0.99 | <b>rs34974290</b>     |
| cg25176883           | 0.39                      | 0.70     | 174 | 1.00 | 1.00 | 1.00 | 1.00 | 1.00 | 1.00 | 1.00 | <b>rs34974290</b>     |
| <b>VCAN (5q14.2)</b> |                           |          |     |      |      |      |      |      |      |      |                       |
| cg04223006           | 1.45                      | 0.15     | 249 | 0.96 | 0.87 | 0.87 | 0.87 | 0.87 | 0.79 | 0.79 | rs7733216             |
| cg26496628           | 1.72                      | 0.09     | 345 | 0.96 | 0.87 | 0.87 | 0.87 | 0.87 | 0.79 | 0.79 | rs7733216             |
| cg08891382           | 0.62                      | 0.54     | 265 | 0.96 | 0.87 | 0.87 | 0.87 | 0.87 | 0.79 | 0.79 | rs7733216             |
| cg27109568           | -0.68                     | 0.50     | 343 | 0.96 | 0.88 | 0.88 | 0.88 | 0.88 | 0.80 | 0.80 | rs3852188             |
| cg22039204           | -1.95                     | 0.05     | 297 | 0.96 | 0.88 | 0.88 | 0.88 | 0.88 | 0.80 | 0.80 | rs7733216             |
| <b>XKR6 (8p23.1)</b> |                           |          |     |      |      |      |      |      |      |      |                       |
| cg23565027           | -0.41                     | 0.68     | 253 | 0.82 | 0.74 | 0.74 | 0.79 | 0.79 | 0.71 | 0.71 | rs6987059             |
| cg11051055           | 0.32                      | 0.75     | 282 | 0.84 | 0.76 | 0.76 | 0.81 | 0.81 | 0.73 | 0.73 | rs6987059             |
| cg16513326           | -0.49                     | 0.62     | 282 | 0.80 | 0.84 | 0.80 | 0.77 | 0.73 | 0.77 | 0.73 | rs4307299             |
| cg11434468           | 0.50                      | 0.62     | 284 | 0.84 | 0.76 | 0.76 | 0.81 | 0.81 | 0.73 | 0.73 | rs6987059             |
| cg24631970           | -0.33                     | 0.75     | 284 | 0.84 | 0.76 | 0.76 | 0.81 | 0.81 | 0.73 | 0.73 | rs6987059             |
| cg12276019           | -1.12                     | 0.26     | 282 | 0.84 | 0.76 | 0.76 | 0.81 | 0.81 | 0.73 | 0.73 | rs6987059             |
| cg27025752           | -0.18                     | 0.86     | 284 | 0.84 | 0.76 | 0.76 | 0.81 | 0.81 | 0.73 | 0.73 | rs10109167            |
| cg04657224           | -1.29                     | 0.20     | 284 | 0.84 | 0.76 | 0.76 | 0.81 | 0.81 | 0.73 | 0.73 | rs10109167            |
| cg24664689           | -0.47                     | 0.64     | 283 | 0.84 | 0.77 | 0.77 | 0.81 | 0.81 | 0.73 | 0.73 | rs6987059             |
| cg09758742           | -1.79                     | 0.07     | 284 | 0.84 | 0.77 | 0.77 | 0.81 | 0.81 | 0.74 | 0.74 | rs10109167            |
| cg12267497           | 2.61                      | 8.98E-03 | 275 | 0.84 | 0.77 | 0.77 | 0.81 | 0.81 | 0.74 | 0.74 | rs10109167            |
| cg15301489           | -0.36                     | 0.72     | 283 | 0.85 | 0.78 | 0.78 | 0.82 | 0.82 | 0.74 | 0.74 | rs10109167            |
| cg26675876           | -0.03                     | 0.97     | 284 | 0.85 | 0.78 | 0.78 | 0.82 | 0.82 | 0.75 | 0.75 | rs6987059             |
| cg07229212           | -1.11                     | 0.27     | 283 | 0.85 | 0.78 | 0.78 | 0.82 | 0.82 | 0.75 | 0.75 | rs6987059             |
| cg10947146           | 0.09                      | 0.93     | 283 | 0.85 | 0.78 | 0.78 | 0.82 | 0.82 | 0.75 | 0.75 | rs10109167            |
| cg20940153           | -0.86                     | 0.39     | 284 | 0.85 | 0.78 | 0.78 | 0.82 | 0.82 | 0.75 | 0.75 | rs6987059             |
| cg27487839           | 0.99                      | 0.32     | 282 | 0.86 | 0.78 | 0.78 | 0.82 | 0.82 | 0.75 | 0.75 | rs10109167            |
| cg10333252           | -0.31                     | 0.76     | 280 | 0.87 | 0.80 | 0.80 | 0.83 | 0.83 | 0.77 | 0.77 | rs10109167            |
| cg11746684           | -1.36                     | 0.17     | 282 | 0.88 | 0.83 | 0.83 | 0.85 | 0.85 | 0.79 | 0.79 | rs10109167            |
| cg06819296           | 0.49                      | 0.62     | 283 | 0.93 | 0.93 | 0.92 | 0.89 | 0.88 | 0.88 | 0.88 | rs6601565             |
| cg03617420           | 1.77                      | 0.08     | 269 | 0.93 | 0.98 | 0.93 | 0.93 | 0.88 | 0.93 | 0.88 | rs4841487             |
| cg20189073           | -0.68                     | 0.50     | 273 | 1.00 | 1.00 | 1.00 | 0.92 | 0.92 | 0.92 | 0.92 | rs6601555             |
| cg24574147           | 0.20                      | 0.84     | 272 | 1.00 | 1.00 | 1.00 | 0.92 | 0.92 | 0.92 | 0.92 | rs11985603            |
| cg10823658           | 0.79                      | 0.43     | 272 | 1.00 | 1.00 | 1.00 | 0.92 | 0.92 | 0.92 | 0.92 | rs6601555             |
| cg16232071           | 1.55                      | 0.12     | 273 | 1.00 | 1.00 | 1.00 | 0.92 | 0.92 | 0.92 | 0.92 | rs11250113            |
| cg10596361           | 0.51                      | 0.61     | 273 | 1.00 | 1.00 | 1.00 | 0.92 | 0.92 | 0.92 | 0.92 | rs11250113            |
| cg17167536           | -0.48                     | 0.63     | 271 | 1.00 | 1.00 | 1.00 | 0.92 | 0.92 | 0.92 | 0.92 | rs11777486            |
| cg16664915           | -0.41                     | 0.68     | 273 | 1.00 | 1.00 | 1.00 | 0.92 | 0.92 | 0.92 | 0.92 | rs11777486            |
| cg02475374           | -1.81                     | 0.07     | 273 | 1.00 | 1.00 | 1.00 | 0.95 | 0.95 | 0.95 | 0.95 | rs4841500             |

DLPFC: dorsolateral prefrontal cortex, DNAm: DNA methylation, nsp: number of SNPs, EWAS: epigenome-wide association study, posterior probability (PP) for each hypothesis, genetic variants are associated with WMH burden (PPA), with DLPFC DNA methylation (DNAm) (PPB), with DLPFC gene expression (PPC), with WMH burden and DLPFC DNAm (PPAB), with WMH burden and DLPFC gene expression (PPAC), with DNAm and gene expression in DLPFC (PPBC), and with WMH burden, DNAm and gene expression (PPFC). Genetic associations with WMH burden are from Sargurupremraj M (2020)a, and with brain omics are from Ng B (2017)b.

a. Sargurupremraj M, Suzuki H, Jian X, Sarnowski C, Evans TE, Bis JC, et al. Cerebral small vessel disease genomics and its implications across the lifespan. *Nature Communications*. 2020;11:6285.

b. Ng B, White CC, Klein H-U, Sieberts SK, McCabe C, Patrick E, et al. An xQTL map integrates the genetic architecture of the human brain's transcriptome and epigenome. *Nature neuroscience*. 2017;20:1418–26.

\*GWAS sentinel SNP is highlighted in bold.

**Supplementary Table 17 Interindividual correlation between DNA methylation levels in blood and prefrontal cortex tissue**

|            | <b>r</b> | <b>P</b>               |
|------------|----------|------------------------|
| cg24202936 | 0.327    | 4.52x10 <sup>-3</sup>  |
| cg17417856 | 0.162    | 0.168                  |
| cg01506471 | 0.866    | 2.06x10 <sup>-23</sup> |
| cg14547240 | 0.003    | 0.978                  |
| cg21547371 | 0.033    | 0.783                  |
| cg03116124 | 0.292    | 0.012                  |
| cg06809326 | 0.566    | 1.49x10 <sup>-7</sup>  |
| cg13476133 | 0.294    | 0.011                  |
| cg14133539 | 0.136    | 0.247                  |
| cg17577122 | -0.158   | 0.178                  |
| cg23586595 | -0.242   | 0.038                  |
| cg23054394 | -0.123   | 0.295                  |

r: Pearson correlation coefficient between DNAm in blood and prefrontal cortex tissue.

Correlation between DNAm levels in blood and brain was computed in 74 subjects (Hannon E *et al.* 2015).

Hannon E *et al.* "Interindividual methylomic variation across blood, cortex, and cerebellum: implications for epigenetic studies of neurological and neuropsychiatric phenotypes." *Epigenetics*. 2015;10(11):1024-1032. data available from <https://epigenetics.essex.ac.uk/bloodbrain/>.

**Supplementary Table 18 Multiple trait co-localization of brain omics and white matter hyperintensities at cg24202936 and cg06809326**

| Gene symbol          | DNAm       | nsnp | PPA  | PPB  | PPAB | PPC  | PPAC | PPBC | PPFC        |
|----------------------|------------|------|------|------|------|------|------|------|-------------|
| <i>FOLH1</i>         | cg24202936 | 61   | 0.77 | 0.97 | 0.77 | 0.95 | 0.75 | 0.95 | <b>0.75</b> |
| <i>CCDC144NL-ASI</i> | cg06809326 | 91   | 0.70 | 0.90 | 0.70 | 0.89 | 0.69 | 0.89 | 0.69        |

DLPFC: dorsolateral prefrontal cortex, DNAm: DNA methylation, nsnp: number of SNPs, posterior probability (PP) for each hypotheses, genetic variants are associated with WMH burden (PPA), with DLPFC DNAm (PPB), with DLPFC gene expression (PPC), with WMH burden and DLPFC DNAm (PPAB), with WMH burden and DLPFC gene expression (PPAC), with DNAm and gene expression in DLPFC (PPBC), and with WMH burden, DNAm and gene expression (PPFC).

Genetic associations with WMH burden are from sargurupremraj M (2020)<sup>a</sup>, and with brain omics are from Ng B (2017)<sup>b</sup>.

a. Sargurupremraj M, Suzuki H, Jian X, Sarnowski C, Evans TE, Bis JC, et al. Cerebral small vessel disease genomics and its implications across the lifespan. *Nature Communications*. 2020;11:6285.

b. Ng B, White CC, Klein H-U, Sieberts SK, McCabe C, Patrick E, et al. An xQTL map integrates the genetic architecture of the human brain's transcriptome and epigenome. *Nature neuroscience*. 2017;20:1418–26.

**Supplementary Table 19 Meta-analysis of GWAS, EWAS, and TWAS marker set enrichment associations (MERGEOMICS)**

| MODULE   | P        | FDR      | NGENES | MODULE DESCRIPTION                                                                                     |
|----------|----------|----------|--------|--------------------------------------------------------------------------------------------------------|
| M18306   | 1.14E-45 | 6.71E-43 | 211    | Regulation of actin cytoskeleton                                                                       |
| M10401   | 1.10E-35 | 4.86E-33 | 18     | Telomeres, Telomerase, Cellular Aging, and Immortality                                                 |
| rctm0602 | 3.17E-34 | 1.12E-31 | 84     | Integrin cell surface interactions                                                                     |
| rctm1272 | 1.41E-33 | 4.13E-31 | 32     | Thrombin signalling through proteinase activated receptors (PARs)                                      |
| rctm0764 | 4.70E-32 | 1.18E-29 | 9      | Nef Mediated CD4 Down-regulation                                                                       |
| rctm1167 | 3.13E-31 | 6.89E-29 | 8      | Sperm Motility And Taxes                                                                               |
| rctm0244 | 1.14E-29 | 2.23E-27 | 87     | Class B/2 (Secretin family receptors)                                                                  |
| rctm0482 | 2.56E-29 | 4.26E-27 | 101    | GTP hydrolysis and joining of the 60S ribosomal subunit                                                |
| M17668   | 2.69E-29 | 4.71E-27 | 12     | Rho-Selective Guanine Exchange Factor AKAP13 Mediates Stress Fiber Formation                           |
| rctm0769 | 2.78E-28 | 4.09E-26 | 20     | Nef-mediates down modulation of cell surface receptors by recruiting them to clathrin adaptors         |
| rctm1059 | 7.10E-28 | 9.64E-26 | 53     | Ribosomal scanning and start codon recognition                                                         |
| M15394   | 1.68E-27 | 2.12E-25 | 20     | Acute Myocardial Infarction                                                                            |
| M189     | 1.84E-27 | 2.17E-25 | 84     | Ribosome                                                                                               |
| rctm0384 | 3.56E-27 | 3.93E-25 | 108    | Eukaryotic Translation Initiation                                                                      |
| rctm0003 | 4.63E-27 | 4.81E-25 | 100    | 3' -UTR-mediated translational regulation                                                              |
| rctm0211 | 1.56E-26 | 1.53E-24 | 108    | Cap-dependent Translation Initiation                                                                   |
| rctm1268 | 2.44E-26 | 2.27E-24 | 31     | The phototransduction cascade                                                                          |
| rctm0765 | 4.87E-25 | 4.29E-23 | 7      | Nef Mediated CD8 Down-regulation                                                                       |
| rctm0773 | 1.51E-24 | 1.27E-22 | 22     | Nephrin interactions                                                                                   |
| rctm0428 | 1.74E-24 | 1.40E-22 | 90     | Formation of a pool of free 40S subunits                                                               |
| M16563   | 1.36E-23 | 1.04E-21 | 23     | mTOR Signaling Pathway                                                                                 |
| rctm0184 | 7.10E-23 | 5.22E-21 | 21     | CD28 dependent PI3K/Akt signaling                                                                      |
| M8719    | 2.63E-21 | 1.86E-19 | 25     | mCalpain and friends in Cell motility                                                                  |
| rctm1273 | 3.43E-21 | 2.33E-19 | 23     | Thromboxane signalling through TP receptor                                                             |
| rctm0571 | 3.91E-21 | 2.55E-19 | 30     | Inactivation, recovery and regulation of the phototransduction cascade                                 |
| rctm0789 | 6.36E-21 | 3.87E-19 | 86     | Nonsense Mediated Decay Independent of the Exon Junction Complex                                       |
| rctm0894 | 6.37E-21 | 3.88E-19 | 18     | Pre-NOTCH Processing in Golgi                                                                          |
| rctm0854 | 2.20E-20 | 1.29E-18 | 78     | Peptide hormone metabolism                                                                             |
| rctm0622 | 6.23E-20 | 3.55E-18 | 38     | Intrinsic Pathway for Apoptosis                                                                        |
| rctm0446 | 8.24E-20 | 4.54E-18 | 74     | G alpha (12/13) signalling events                                                                      |
| rctm0774 | 1.08E-19 | 5.78E-18 | 10     | Netrin mediated repulsion signals                                                                      |
| M7253    | 1.56E-19 | 8.08E-18 | 199    | Focal adhesion                                                                                         |
| rctm0080 | 1.83E-19 | 9.21E-18 | 4      | Activation, myristoylation of BID and translocation to mitochondria                                    |
| rctm0635 | 1.97E-19 | 9.67E-18 | 100    | L13a-mediated translational silencing of Ceruloplasmin expression                                      |
| M7721    | 2.32E-19 | 1.11E-17 | 16     | Eukaryotic protein translation                                                                         |
| rctm0655 | 2.84E-19 | 1.29E-17 | 9      | Lysosphingolipid and LPA receptors                                                                     |
| M11792   | 2.87E-19 | 1.30E-17 | 16     | Sonic Hedgehog (Shh) Pathway                                                                           |
| rctm1302 | 4.09E-19 | 1.80E-17 | 140    | Translation                                                                                            |
| rctm0570 | 4.80E-19 | 2.06E-17 | 8      | Inactivation of Cdc42 and Rac                                                                          |
| rctm0389 | 5.48E-19 | 2.30E-17 | 5      | Extrinsic Pathway                                                                                      |
| M7014    | 7.32E-19 | 3.00E-17 | 30     | PKC-catalyzed phosphorylation of inhibitory phosphoprotein of myosin phosphatase                       |
| rctm0382 | 1.57E-18 | 6.31E-17 | 10     | Ethanol oxidation                                                                                      |
| rctm0686 | 1.31E-17 | 5.14E-16 | 495    | Metabolism of lipids and lipoproteins                                                                  |
| M3228    | 2.30E-17 | 8.81E-16 | 84     | Small cell lung cancer                                                                                 |
| rctm0298 | 2.38E-17 | 8.93E-16 | 14     | DCC mediated attractive signaling                                                                      |
| rctm0419 | 2.80E-17 | 1.03E-15 | 24     | Fertilization                                                                                          |
| rctm0388 | 3.55E-17 | 1.26E-15 | 211    | Extracellular matrix organization                                                                      |
| rctm1271 | 3.58E-17 | 1.27E-15 | 27     | The role of Nef in HIV-1 replication and disease pathogenesis                                          |
| rctm0681 | 7.14E-17 | 2.47E-15 | 16     | Metabolism of Angiotensinogen to Angiotensins                                                          |
| M7098    | 8.21E-17 | 2.79E-15 | 84     | ECM-receptor interaction                                                                               |
| rctm0383 | 8.73E-17 | 2.90E-15 | 84     | Eukaryotic Translation Elongation                                                                      |
| M10792   | 1.07E-16 | 3.50E-15 | 266    | MAPK signaling pathway                                                                                 |
| rctm0216 | 1.47E-16 | 4.72E-15 | 7      | Cation-coupled Chloride cotransporters                                                                 |
| rctm0368 | 2.21E-16 | 6.95E-15 | 41     | Elastic fibre formation                                                                                |
| rctm0437 | 2.99E-16 | 9.13E-15 | 46     | Formation of the ternary complex, and subsequently, the 43S complex                                    |
| rctm0077 | 3.01E-16 | 9.19E-15 | 54     | Activation of the mRNA upon binding of the cap-binding complex and eIFs, and subsequent binding to 43S |
| rctm0385 | 3.68E-16 | 1.10E-14 | 81     | Eukaryotic Translation Termination                                                                     |
| rctm1303 | 6.01E-16 | 1.75E-14 | 53     | Translation initiation complex formation                                                               |
| rctm0852 | 6.07E-16 | 1.76E-14 | 81     | Peptide chain elongation                                                                               |
| M16697   | 6.31E-16 | 1.80E-14 | 15     | CD40L Signaling Pathway                                                                                |
| M18155   | 1.02E-15 | 2.86E-14 | 137    | Insulin signaling pathway                                                                              |
| M15247   | 1.37E-15 | 3.78E-14 | 133    | Ubiquitin mediated proteolysis                                                                         |
| rctm1358 | 1.80E-15 | 4.87E-14 | 82     | Viral mRNA Translation                                                                                 |
| rctm1412 | 2.26E-15 | 6.05E-14 | 9      | 75NTR regulates axonogenesis                                                                           |
| M13883   | 6.27E-15 | 1.65E-13 | 34     | How Progesterone Initiates Oocyte Membrane                                                             |
| rctm1060 | 8.15E-15 | 2.12E-13 | 9      | Role of Abl in Robo-Slit signaling                                                                     |
| rctm0569 | 1.20E-14 | 3.06E-13 | 18     | Inactivation of APC/C via direct inhibition of the APC/C complex                                       |

| MODULE   | P        | FDR      | NGENES | MODULE DESCRIPTION                                                                                                          |
|----------|----------|----------|--------|-----------------------------------------------------------------------------------------------------------------------------|
| M6355    | 1.43E-14 | 3.61E-13 | 24     | Erk and PI-3 Kinase Are Necessary for Collagen Binding in Corneal Epithelia                                                 |
| rctm0275 | 1.54E-14 | 3.82E-13 | 56     | Costimulation by the CD28 family                                                                                            |
| rctm1140 | 2.18E-14 | 5.34E-13 | 32     | Signaling by NOTCH2                                                                                                         |
| rctm1108 | 4.84E-14 | 1.17E-12 | 32     | Signal amplification                                                                                                        |
| rctm0743 | 5.52E-14 | 1.32E-12 | 63     | NCAM signaling for neurite out-growth                                                                                       |
| rctm0183 | 7.70E-14 | 1.81E-12 | 31     | CD28 co-stimulation                                                                                                         |
| rctm0576 | 1.00E-13 | 2.33E-12 | 98     | Influenza Viral RNA Transcription and Replication                                                                           |
| rctm0588 | 1.11E-13 | 2.54E-12 | 18     | Inhibition of the proteolytic activity of APC/C required for the onset of anaphase by mitotic spindle checkpoint components |
| rctm1038 | 1.43E-13 | 3.23E-12 | 24     | Reproduction                                                                                                                |
| M12950   | 1.88E-13 | 4.19E-12 | 13     | Angiotensin-converting enzyme 2 regulates heart function                                                                    |
| rctm0145 | 2.31E-13 | 5.09E-12 | 256    | Axon guidance                                                                                                               |
| M10547   | 2.63E-13 | 5.72E-12 | 19     | Role of MAL in Rho-Mediated Activation of SRF                                                                               |
| rctm0893 | 3.15E-13 | 6.78E-12 | 55     | Pre-NOTCH Expression and Processing                                                                                         |
| M17636   | 4.15E-13 | 8.73E-12 | 17     | Renin-angiotensin system                                                                                                    |
| M7825    | 4.16E-13 | 8.74E-12 | 20     | Y branching of actin filaments                                                                                              |
| M7963    | 4.30E-13 | 8.92E-12 | 124    | Cell cycle                                                                                                                  |
| rctm1196 | 6.35E-13 | 1.30E-11 | 4      | Synthesis of IPs in the nucleus                                                                                             |
| M9670    | 6.44E-13 | 1.31E-11 | 25     | TNF/Stress Related Signaling                                                                                                |
| rctm0146 | 9.24E-13 | 1.85E-11 | 8      | Axonal growth inhibition (RHOA activation)                                                                                  |
| rctm1070 | 1.30E-12 | 2.57E-11 | 14     | SEMA3A-Plexin repulsion signaling by inhibiting Integrin adhesion                                                           |
| rctm1162 | 1.91E-12 | 3.75E-11 | 22     | Smooth Muscle Contraction                                                                                                   |
| rctm0543 | 1.99E-12 | 3.86E-11 | 12     | Hormone-sensitive lipase (HSL)-mediated triacylglycerol hydrolysis                                                          |
| rctm1205 | 2.02E-12 | 3.88E-11 | 3      | Synthesis of PIPs at the ER membrane                                                                                        |
| M17294   | 2.49E-12 | 4.72E-11 | 23     | Ras Signaling Pathway                                                                                                       |
| rctm1030 | 3.64E-12 | 6.84E-11 | 6      | Release of eIF4E                                                                                                            |
| M17807   | 3.83E-12 | 7.10E-11 | 55     | Basal cell carcinoma                                                                                                        |
| rctm1096 | 4.87E-12 | 8.95E-11 | 15     | Sema3A PAK dependent Axon repulsion                                                                                         |
| rctm0207 | 5.09E-12 | 9.26E-11 | 10     | Calcitonin-like ligand receptors                                                                                            |
| rctm0332 | 5.19E-12 | 9.34E-11 | 85     | Diseases associated with visual transduction                                                                                |
| rctm0788 | 5.65E-12 | 1.01E-10 | 101    | Nonsense Mediated Decay Enhanced by the Exon Junction Complex                                                               |
| rctm0273 | 7.02E-12 | 1.24E-10 | 17     | Conversion from APC/C:Cdc20 to APC/C:Cdh1 in late anaphase                                                                  |
| rctm0722 | 7.39E-12 | 1.29E-10 | 19     | Mitotic Spindle Checkpoint                                                                                                  |
| M3342    | 8.85E-12 | 1.53E-10 | 38     | Integrin Signaling Pathway                                                                                                  |
| rctm1360 | 1.00E-11 | 1.71E-10 | 84     | Visual phototransduction                                                                                                    |
| M984     | 1.11E-11 | 1.88E-10 | 37     | Toll-Like Receptor Pathway                                                                                                  |
| rctm0520 | 1.68E-11 | 2.83E-10 | 4      | HCN channels                                                                                                                |
| rctm1400 | 1.72E-11 | 2.86E-10 | 11     | mTORC1-mediated signalling                                                                                                  |
| rctm0575 | 2.12E-11 | 3.50E-10 | 133    | Influenza Life Cycle                                                                                                        |
| M16120   | 2.94E-11 | 4.80E-10 | 13     | How does salmonella hijack a cell                                                                                           |
| M16334   | 4.39E-11 | 7.11E-10 | 10     | Eph Kinases and ephrins support platelet aggregation                                                                        |
| M17673   | 4.67E-11 | 7.49E-10 | 74     | Cardiac muscle contraction                                                                                                  |
| M10082   | 4.82E-11 | 7.66E-10 | 18     | TNFR2 Signaling Pathway                                                                                                     |
| rctm0477 | 4.90E-11 | 7.72E-10 | 31     | GPVI-mediated activation cascade                                                                                            |
| M6487    | 5.23E-11 | 8.17E-10 | 14     | Platelet Amyloid Precursor Protein Pathway                                                                                  |
| M3578    | 5.97E-11 | 9.24E-10 | 85     | Progesterone-mediated oocyte maturation                                                                                     |
| rctm0072 | 7.08E-11 | 1.09E-09 | 5      | Activation of RAS in B Cells                                                                                                |
| rctm0582 | 7.81E-11 | 1.19E-09 | 28     | Inhibition of Insulin Secretion by Adrenaline/Noradrenaline                                                                 |
| rctm0996 | 9.64E-11 | 1.45E-09 | 76     | Regulation of Insulin Secretion                                                                                             |
| rctm0070 | 1.03E-10 | 1.54E-09 | 4      | Activation of PKB                                                                                                           |
| rctm1087 | 1.10E-10 | 1.63E-09 | 104    | SRP-dependent cotranslational protein targeting to membrane                                                                 |
| rctm0327 | 1.14E-10 | 1.67E-09 | 409    | Developmental Biology                                                                                                       |
| rctm1160 | 1.70E-10 | 2.48E-09 | 15     | Signalling to p38 via RIT and RIN                                                                                           |
| rctm0006 | 2.25E-10 | 3.24E-09 | 9      | A third proteolytic cleavage releases NICD                                                                                  |
| rctm0758 | 2.26E-10 | 3.24E-09 | 12     | NOTCH2 intracellular domain regulates transcription                                                                         |
| M19540   | 2.35E-10 | 3.34E-09 | 121    | Oxidative phosphorylation                                                                                                   |
| rctm0991 | 2.51E-10 | 3.54E-09 | 9      | Regulation of Gene Expression by Hypoxia-inducible Factor                                                                   |
| rctm1148 | 2.77E-10 | 3.88E-09 | 85     | Signaling by Type 1 Insulin-like Growth Factor 1 Receptor (IGF1R)                                                           |
| rctm0823 | 2.79E-10 | 3.88E-09 | 12     | PECAM1 interactions                                                                                                         |
| M1519    | 2.99E-10 | 4.13E-09 | 174    | Endocytosis                                                                                                                 |
| M8728    | 3.05E-10 | 4.18E-09 | 83     | Hypertrophic cardiomyopathy (HCM)                                                                                           |
| rctm0790 | 3.93E-10 | 5.33E-09 | 101    | Nonsense-Mediated Decay                                                                                                     |
| rctm0047 | 4.16E-10 | 5.60E-09 | 3      | Activation of BIM and translocation to mitochondria                                                                         |
| rctm0574 | 5.16E-10 | 6.90E-09 | 137    | Influenza Infection                                                                                                         |
| rctm0115 | 5.93E-10 | 7.87E-09 | 32     | Antigen Activates B Cell Receptor Leading to Generation of Second Messengers                                                |
| rctm1199 | 6.16E-10 | 8.11E-09 | 6      | Synthesis of Lipoxins (LX)                                                                                                  |
| rctm0775 | 6.36E-10 | 8.31E-09 | 42     | Netrin-1 signaling                                                                                                          |
| M14899   | 7.10E-10 | 9.21E-09 | 33     | Angiotensin II mediated activation of JNK Pathway via Pyk2 dependent signaling                                              |
| M16004   | 7.84E-10 | 1.01E-08 | 65     | Antigen processing and presentation                                                                                         |
| rctm0553 | 7.91E-10 | 1.01E-08 | 85     | IGF1R signaling cascade                                                                                                     |
| rctm1187 | 9.25E-10 | 1.17E-08 | 6      | Synthesis of 5-eicosatetraenoic acids                                                                                       |

| MODULE   | P        | FDR      | NGENES | MODULE DESCRIPTION                                                                           |
|----------|----------|----------|--------|----------------------------------------------------------------------------------------------|
| rctm0868 | 1.07E-09 | 1.35E-08 | 17     | Phosphorylation of the APC/C                                                                 |
| rctm0522 | 1.08E-09 | 1.36E-08 | 205    | HIV Infection                                                                                |
| M11079   | 1.20E-09 | 1.49E-08 | 46     | N-Glycan biosynthesis                                                                        |
| M2333    | 1.49E-09 | 1.83E-08 | 56     | Pathogenic Escherichia coli infection                                                        |
| rctm0011 | 1.50E-09 | 1.84E-08 | 25     | ADP signalling through P2Y purinoceptor 1                                                    |
| rctm0709 | 1.62E-09 | 1.97E-08 | 49     | Mitochondrial Protein Import                                                                 |
| rctm0318 | 1.70E-09 | 2.05E-08 | 12     | Depolarization of the Presynaptic Terminal Triggers the Opening of Calcium Channels          |
| M3494    | 1.87E-09 | 2.24E-08 | 36     | Thrombin signaling and protease-activated receptors                                          |
| M13863   | 2.00E-09 | 2.38E-08 | 87     | MAPKinase Signaling Pathway                                                                  |
| M14449   | 2.23E-09 | 2.64E-08 | 18     | METS affect on Macrophage Differentiation                                                    |
| M10765   | 2.57E-09 | 3.02E-08 | 11     | Lck and Fyn tyrosine kinases in initiation of TCR Activation                                 |
| rctm0121 | 2.78E-09 | 3.25E-08 | 13     | Apoptosis induced DNA fragmentation                                                          |
| rctm0967 | 2.83E-09 | 3.29E-08 | 16     | Rap1 signalling                                                                              |
| rctm1000 | 3.49E-09 | 4.03E-08 | 43     | Regulation of Insulin Secretion by Glucagon-like Peptide-1                                   |
| rctm0012 | 3.61E-09 | 4.14E-08 | 22     | ADP signalling through P2Y purinoceptor 12                                                   |
| M15371   | 4.18E-09 | 4.76E-08 | 10     | Electron Transport Reaction in Mitochondria                                                  |
| rctm0056 | 4.36E-09 | 4.93E-08 | 13     | Activation of DNA fragmentation factor                                                       |
| rctm0860 | 4.76E-09 | 5.35E-08 | 9      | Phenylalanine and tyrosine catabolism                                                        |
| M15422   | 5.47E-09 | 6.11E-08 | 11     | Vitamin C in the Brain                                                                       |
| rctm1157 | 6.73E-09 | 7.47E-08 | 37     | Signalling to ERKs                                                                           |
| rctm0255 | 7.53E-09 | 8.30E-08 | 19     | Cobalamin (Cbl, vitamin B12) transport and metabolism                                        |
| M5109    | 9.09E-09 | 9.96E-08 | 98     | Pyrimidine metabolism                                                                        |
| rctm0870 | 9.34E-09 | 1.02E-07 | 11     | Platelet Adhesion to exposed collagen                                                        |
| rctm0943 | 9.91E-09 | 1.07E-07 | 28     | RNA Polymerase I Promoter Opening                                                            |
| M13486   | 1.16E-08 | 1.25E-07 | 172    | Huntington's disease                                                                         |
| rctm1075 | 1.32E-08 | 1.42E-07 | 18     | SHC-related events triggered by IGF1R                                                        |
| M4085    | 1.39E-08 | 1.48E-07 | 35     | Primary immunodeficiency                                                                     |
| rctm0498 | 1.44E-08 | 1.52E-07 | 30     | Glucagon-type ligand receptors                                                               |
| rctm1226 | 1.75E-08 | 1.84E-07 | 13     | Synthesis, Secretion, and Inactivation of Glucose-dependent Insulinotropic Polypeptide (GIP) |
| M5374    | 2.29E-08 | 2.39E-07 | 10     | The SARS-coronavirus Life Cycle                                                              |
| M11521   | 2.41E-08 | 2.50E-07 | 61     | Glycolysis / Gluconeogenesis                                                                 |
| rctm0620 | 2.54E-08 | 2.62E-07 | 11     | Interleukin-7 signaling                                                                      |
| rctm1198 | 2.75E-08 | 2.82E-07 | 20     | Synthesis of Leukotrienes (LT) and Eoxins (EX)                                               |
| rctm1289 | 3.20E-08 | 3.27E-07 | 16     | Trafficking of GluR2-containing AMPA receptors                                               |
| M16763   | 3.42E-08 | 3.47E-07 | 126    | Neurotrophin signaling pathway                                                               |
| rctm0352 | 3.71E-08 | 3.74E-07 | 52     | ECM proteoglycans                                                                            |
| rctm0564 | 4.33E-08 | 4.34E-07 | 82     | IRS-related events triggered by IGF1R                                                        |
| M13143   | 4.94E-08 | 4.93E-07 | 18     | uCalpain and friends in Cell spread                                                          |
| rctm0592 | 5.31E-08 | 5.26E-07 | 44     | Inositol phosphate metabolism                                                                |
| rctm0760 | 6.65E-08 | 6.56E-07 | 15     | NRIF signals cell death from the nucleus                                                     |
| rctm0926 | 6.92E-08 | 6.79E-07 | 13     | Purine salvage                                                                               |
| M15109   | 7.16E-08 | 6.98E-07 | 10     | Glycolysis Pathway                                                                           |
| rctm1130 | 9.25E-08 | 8.96E-07 | 108    | Signaling by Insulin receptor                                                                |
| rctm1145 | 9.43E-08 | 9.09E-07 | 31     | Signaling by Robo receptor                                                                   |
| M3896    | 9.54E-08 | 9.14E-07 | 54     | Inositol phosphate metabolism                                                                |
| M2642    | 1.13E-07 | 1.08E-06 | 85     | TGF-beta signaling pathway                                                                   |
| M1001    | 1.14E-07 | 1.08E-06 | 32     | Rho cell motility signaling pathway                                                          |
| rctm0872 | 1.97E-07 | 1.86E-06 | 204    | Platelet activation, signaling and aggregation                                               |
| rctm0185 | 2.09E-07 | 1.96E-06 | 11     | CD28 dependent Vav1 pathway                                                                  |
| rctm1184 | 2.42E-07 | 2.26E-06 | 9      | Synthesis of (16-20)-hydroxyeicosatetraenoic acids (HETE)                                    |
| rctm0969 | 2.69E-07 | 2.49E-06 | 4      | Reactions specific to the complex N-glycan synthesis pathway                                 |
| rctm0934 | 2.77E-07 | 2.56E-06 | 5      | RAF activation                                                                               |
| rctm0640 | 2.87E-07 | 2.64E-06 | 114    | Late Phase of HIV Life Cycle                                                                 |
| M7239    | 3.27E-07 | 2.99E-06 | 10     | Apoptotic DNA fragmentation and tissue homeostasis                                           |
| M1296    | 3.36E-07 | 3.06E-06 | 17     | IL-7 Signal Transduction                                                                     |
| M17941   | 3.40E-07 | 3.08E-06 | 26     | Neuropeptides VIP and PACAP inhibit the apoptosis of activated T cells                       |
| M4791    | 3.50E-07 | 3.14E-06 | 24     | Regulation of eIF4e and p70 S6 Kinase                                                        |
| rctm1025 | 3.51E-07 | 3.14E-06 | 3      | Regulation of thyroid hormone activity                                                       |
| M5539    | 3.56E-07 | 3.17E-06 | 129    | Axon guidance                                                                                |
| rctm1133 | 3.61E-07 | 3.20E-06 | 120    | Signaling by NOTCH                                                                           |
| rctm0019 | 4.21E-07 | 3.71E-06 | 21     | APC/C:Cdc20 mediated degradation of Cyclin B                                                 |
| rctm0325 | 4.75E-07 | 4.16E-06 | 17     | Destabilization of mRNA by KSRP                                                              |
| M638     | 5.11E-07 | 4.46E-06 | 73     | Adherens junction                                                                            |
| rctm0731 | 5.83E-07 | 5.06E-06 | 49     | Muscle contraction                                                                           |
| rctm0120 | 6.07E-07 | 5.25E-06 | 157    | Apoptosis                                                                                    |
| rctm0017 | 7.15E-07 | 6.16E-06 | 23     | APC-Cdc20 mediated degradation of Nek2A                                                      |
| rctm1056 | 8.12E-07 | 6.95E-06 | 12     | Reversible Hydration of Carbon Dioxide                                                       |
| M15898   | 8.36E-07 | 7.13E-06 | 34     | Fructose and mannose metabolism                                                              |
| M835     | 8.42E-07 | 7.14E-06 | 90     | Dilated cardiomyopathy                                                                       |
| M17370   | 8.46E-07 | 7.14E-06 | 10     | Role of Ran in mitotic spindle regulation                                                    |
| rctm0786 | 8.53E-07 | 7.17E-06 | 44     | Non-integrin membrane-ECM interactions                                                       |

| MODULE   | P        | FDR      | NGENES | MODULE DESCRIPTION                                                              |
|----------|----------|----------|--------|---------------------------------------------------------------------------------|
| M7561    | 8.61E-07 | 7.19E-06 | 52     | mTOR signaling pathway                                                          |
| M16991   | 8.79E-07 | 7.28E-06 | 20     | Skeletal muscle hypertrophy is regulated via AKT/mTOR pathway                   |
| M6856    | 8.79E-07 | 7.28E-06 | 79     | Hematopoietic cell lineage                                                      |
| rctm1309 | 9.58E-07 | 7.89E-06 | 51     | Translocation of GLUT4 to the Plasma Membrane                                   |
| M5291    | 9.81E-07 | 8.05E-06 | 16     | Role of PI3K subunit p85 in regulation of Actin Organization and Cell Migration |
| rctm1404 | 1.02E-06 | 8.33E-06 | 13     | p38MAPK events                                                                  |
| rctm0858 | 1.06E-06 | 8.65E-06 | 71     | Phase 1 - Functionalization of compounds                                        |
| rctm0757 | 1.11E-06 | 8.97E-06 | 21     | NOTCH2 Activation and Transmission of Signal to the Nucleus                     |
| rctm0442 | 1.15E-06 | 9.22E-06 | 18     | Frs2-mediated activation                                                        |
| rctm0572 | 1.40E-06 | 1.12E-05 | 22     | Incretin Synthesis, Secretion, and Inactivation                                 |
| rctm0073 | 1.43E-06 | 1.14E-05 | 14     | Activation of Rac                                                               |
| rctm0682 | 1.54E-06 | 1.22E-05 | 259    | Metabolism of RNA                                                               |
| rctm0312 | 1.89E-06 | 1.49E-05 | 39     | Defensins                                                                       |
| M15798   | 1.90E-06 | 1.49E-05 | 70     | Melanoma                                                                        |
| M4470    | 2.16E-06 | 1.70E-05 | 13     | Extrinsic Prothrombin Activation Pathway                                        |
| M4891    | 2.26E-06 | 1.76E-05 | 17     | Regulation of transcriptional activity by PML                                   |
| rctm1023 | 2.40E-06 | 1.86E-05 | 18     | Regulation of signaling by CBL                                                  |
| rctm0825 | 2.53E-06 | 1.96E-05 | 50     | PI Metabolism                                                                   |
| rctm0546 | 2.55E-06 | 1.96E-05 | 4      | Hyaluronan biosynthesis and export                                              |
| M4629    | 2.66E-06 | 2.04E-05 | 23     | Nitrogen metabolism                                                             |
| rctm0988 | 2.97E-06 | 2.26E-05 | 4      | Regulation of Commissural axon pathfinding by Slit and Robo                     |
| rctm0167 | 2.98E-06 | 2.26E-05 | 12     | Bile salt and organic anion SLC transporters                                    |
| rctm0913 | 3.21E-06 | 2.43E-05 | 20     | Prolonged ERK activation events                                                 |
| rctm0259 | 3.46E-06 | 2.61E-05 | 83     | Collagen formation                                                              |
| M13036   | 3.72E-06 | 2.79E-05 | 35     | Prion diseases                                                                  |
| rctm0165 | 3.97E-06 | 2.97E-05 | 9      | Bicarbonate transporters                                                        |
| M15997   | 4.79E-06 | 3.57E-05 | 23     | Intrinsic Prothrombin Activation Pathway                                        |
| rctm0981 | 5.25E-06 | 3.89E-05 | 10     | Regulated proteolysis of p75NTR                                                 |
| M8232    | 5.70E-06 | 4.21E-05 | 69     | Long-term depression                                                            |
| rctm1291 | 7.15E-06 | 5.24E-05 | 172    | Transcription                                                                   |
| rctm1182 | 7.18E-06 | 5.26E-05 | 20     | Syndecan interactions                                                           |
| rctm0046 | 7.24E-06 | 5.28E-05 | 25     | Activation of BH3-only proteins                                                 |
| rctm0903 | 8.02E-06 | 5.82E-05 | 135    | Processing of Capped Intron-Containing Pre-mRNA                                 |
| M3261    | 8.34E-06 | 6.03E-05 | 102    | Toll-like receptor signaling pathway                                            |
| rctm0028 | 8.50E-06 | 6.12E-05 | 5      | Abacavir metabolism                                                             |
| rctm0662 | 1.08E-05 | 7.77E-05 | 88     | MHC class II antigen presentation                                               |
| rctm1113 | 1.24E-05 | 8.83E-05 | 23     | Signaling by BMP                                                                |
| rctm0687 | 1.24E-05 | 8.84E-05 | 214    | Metabolism of mRNA                                                              |
| rctm0504 | 1.35E-05 | 9.56E-05 | 30     | Glutamate Binding, Activation of AMPA Receptors and Synaptic Plasticity         |
| rctm0724 | 1.40E-05 | 9.88E-05 | 30     | Molecules associated with elastic fibres                                        |
| M13324   | 1.47E-05 | 0.0001   | 15     | Hypoxia-Inducible Factor in the Cardiovascular System                           |
| rctm0177 | 1.51E-05 | 0.00011  | 18     | Botulinum neurotoxicity                                                         |
| rctm0562 | 1.67E-05 | 0.00012  | 78     | IRS-mediated signalling                                                         |
| rctm0915 | 1.71E-05 | 0.00012  | 19     | Prostacyclin signalling through prostacyclin receptor                           |
| M9152    | 1.75E-05 | 0.00012  | 23     | CCR3 signaling in Eosinophils                                                   |
| M9503    | 1.80E-05 | 0.00012  | 30     | FAS signaling pathway ( CD95 )                                                  |
| M4844    | 1.82E-05 | 0.00013  | 189    | Chemokine signaling pathway                                                     |
| rctm0924 | 1.88E-05 | 0.00013  | 33     | Purine metabolism                                                               |
| rctm0164 | 1.90E-05 | 0.00013  | 6      | Beta-oxidation of very long chain fatty acids                                   |
| rctm0140 | 1.97E-05 | 0.00013  | 4      | Astrocytic Glutamate-Glutamine Uptake And Metabolism                            |
| rctm0567 | 1.98E-05 | 0.00013  | 82     | Immunoregulatory interactions between a Lymphoid and a non-Lymphoid cell        |
| rctm0782 | 2.00E-05 | 0.00013  | 4      | Neurotransmitter uptake and Metabolism In Glial Cells                           |
| rctm0676 | 2.00E-05 | 0.00013  | 52     | Meiotic Recombination                                                           |
| rctm0451 | 2.10E-05 | 0.00014  | 25     | G beta:gamma signalling through PI3Kgamma                                       |
| rctm0512 | 2.22E-05 | 0.00015  | 10     | Glycoprotein hormones                                                           |
| rctm0993 | 2.25E-05 | 0.00015  | 25     | Regulation of Hypoxia-inducible Factor (HIF) by Oxygen                          |
| rctm0201 | 2.26E-05 | 0.00015  | 22     | CTLA4 inhibitory signaling                                                      |
| rctm0735 | 2.39E-05 | 0.00016  | 87     | MyD88:Mal cascade initiated on plasma membrane                                  |
| M9177    | 2.43E-05 | 0.00016  | 22     | Dendritic cells in regulating TH1 and TH2 Development                           |
| M9488    | 2.54E-05 | 0.00017  | 60     | Retinol metabolism                                                              |
| rctm0857 | 2.63E-05 | 0.00017  | 33     | Phagosomal maturation (early endosomal stage)                                   |
| rctm0544 | 2.72E-05 | 0.00018  | 124    | Host Interactions of HIV factors                                                |
| rctm1285 | 2.76E-05 | 0.00018  | 87     | Toll Like Receptor TLR6:TLR2 Cascade                                            |
| rctm0744 | 3.17E-05 | 0.0002   | 37     | NCAM1 interactions                                                              |
| M16743   | 3.21E-05 | 0.00021  | 42     | Tyrosine metabolism                                                             |
| rctm0594 | 3.47E-05 | 0.00022  | 22     | Insulin Processing                                                              |
| rctm0453 | 4.13E-05 | 0.00026  | 25     | G protein gated Potassium channels                                              |
| M963     | 4.23E-05 | 0.00027  | 57     | RNA degradation                                                                 |
| rctm1284 | 4.25E-05 | 0.00027  | 87     | Toll Like Receptor TLR1:TLR2 Cascade                                            |
| rctm0563 | 4.37E-05 | 0.00028  | 80     | IRS-related events                                                              |
| M7739    | 4.59E-05 | 0.00029  | 28     | Links between Pyk2 and Map Kinases                                              |



| MODULE   | P        | FDR     | NGENES | MODULE DESCRIPTION                                                                |
|----------|----------|---------|--------|-----------------------------------------------------------------------------------|
| M12868   | 4.74E-05 | 0.0003  | 323    | Pathways in cancer                                                                |
| rctm0677 | 4.79E-05 | 0.0003  | 56     | Meiotic Synapsis                                                                  |
| M16794   | 5.57E-05 | 0.00035 | 66     | Metabolism of xenobiotics by cytochrome P450                                      |
| rctm1219 | 5.60E-05 | 0.00035 | 8      | Synthesis of epoxy (EET) and dihydroxyeicosatrienoic acids (DHET)                 |
| rctm1002 | 5.72E-05 | 0.00035 | 16     | Regulation of KIT signaling                                                       |
| rctm0109 | 5.83E-05 | 0.00036 | 2      | Amplification of signal from unattached kinetochores via a MAD2 inhibitory signal |
| rctm0777 | 5.96E-05 | 0.00037 | 284    | Neuronal System                                                                   |
| rctm1158 | 6.32E-05 | 0.00038 | 27     | Signalling to RAS                                                                 |
| rctm1223 | 6.33E-05 | 0.00039 | 14     | Synthesis of very long-chain fatty acyl-CoAs                                      |
| rctm1335 | 6.70E-05 | 0.00041 | 38     | Triglyceride Biosynthesis                                                         |
| rctm0161 | 6.95E-05 | 0.00042 | 3      | Beta oxidation of palmitoyl-CoA to myristoyl-CoA                                  |
| rctm1278 | 7.75E-05 | 0.00047 | 87     | Toll Like Receptor 2 (TLR2) Cascade                                               |
| rctm1072 | 7.80E-05 | 0.00047 | 28     | SHC-mediated cascade                                                              |
| rctm0148 | 7.83E-05 | 0.00047 | 8      | BH3-only proteins associate with and inactivate anti-apoptotic BCL-2 members      |
| M2623    | 7.88E-05 | 0.00047 | 21     | IGF-1 Signaling Pathway                                                           |
| rctm0154 | 8.05E-05 | 0.00048 | 30     | Beta defensins                                                                    |
| rctm1100 | 8.16E-05 | 0.00048 | 65     | Semaphorin interactions                                                           |
| rctm0300 | 8.44E-05 | 0.0005  | 3      | DNA Damage Bypass                                                                 |
| rctm0199 | 8.63E-05 | 0.00051 | 16     | CRMPs in Sema3A signaling                                                         |
| M9726    | 9.01E-05 | 0.00053 | 70     | Pancreatic cancer                                                                 |
| rctm0597 | 9.67E-05 | 0.00056 | 85     | Insulin receptor signalling cascade                                               |
| rctm0227 | 9.86E-05 | 0.00057 | 25     | Cellular response to hypoxia                                                      |
| rctm0483 | 0.0001   | 0.00059 | 5      | Galactose catabolism                                                              |
| rctm0398 | 0.0001   | 0.0006  | 5      | FGFR1b ligand binding and activation                                              |
| rctm1383 | 0.0001   | 0.0006  | 3      | c-src mediated regulation of Cx43 function and closure of gap junctions           |
| rctm1396 | 0.00011  | 0.00064 | 104    | mRNA Splicing                                                                     |
| M13968   | 0.00011  | 0.00064 | 58     | HIV-1 Nef: negative effector of Fas and TNF                                       |
| rctm0454 | 0.00011  | 0.00064 | 28     | G-protein activation                                                              |
| rctm0060 | 0.00011  | 0.00065 | 25     | Activation of Genes by ATF4                                                       |
| rctm0578 | 0.00011  | 0.00065 | 25     | Inhibition of voltage gated Ca2+ channels via Gbeta/gamma subunits                |
| M4361    | 0.00012  | 0.00068 | 23     | Proximal tubule bicarbonate reclamation                                           |
| M862     | 0.00012  | 0.00069 | 40     | p38 MAPK Signaling Pathway                                                        |
| M5410    | 0.00013  | 0.00072 | 58     | Arachidonic acid metabolism                                                       |
| rctm0452 | 0.00013  | 0.00074 | 20     | G beta:gamma signalling through PLC beta                                          |
| rctm0449 | 0.00014  | 0.00077 | 126    | G alpha (s) signalling events                                                     |
| M321     | 0.00014  | 0.00079 | 73     | Chronic myeloid leukemia                                                          |
| M4741    | 0.00014  | 0.00079 | 115    | Systemic lupus erythematosus                                                      |
| rctm0190 | 0.00014  | 0.00079 | 8      | CHL1 interactions                                                                 |
| rctm0863 | 0.00015  | 0.00081 | 136    | Phospholipid metabolism                                                           |
| rctm0480 | 0.00015  | 0.00082 | 15     | GRB2:SOS provides linkage to MAPK signaling for Integrins                         |
| rctm0326 | 0.00015  | 0.00083 | 17     | Destabilization of mRNA by Tristetraprolin (TTP)                                  |
| M14314   | 0.00017  | 0.00091 | 159    | Purine metabolism                                                                 |
| rctm0951 | 0.00017  | 0.00091 | 94     | RNA Polymerase II Transcription                                                   |
| rctm0615 | 0.00017  | 0.00095 | 7      | Interleukin-1 processing                                                          |
| rctm0370 | 0.00018  | 0.00096 | 3      | Electron Transport from NADPH to Ferredoxin                                       |
| rctm0024 | 0.00018  | 0.00098 | 16     | ARMS-mediated activation                                                          |
| rctm0523 | 0.00019  | 0.00103 | 126    | HIV Life Cycle                                                                    |
| M19784   | 0.00021  | 0.0011  | 46     | T Cell Receptor Signaling Pathway                                                 |
| rctm1073 | 0.00021  | 0.00113 | 15     | SHC-mediated signalling                                                           |
| M699     | 0.00021  | 0.00113 | 42     | Fatty acid metabolism                                                             |
| rctm0228 | 0.00021  | 0.00114 | 25     | Cellular responses to stress                                                      |
| rctm0935 | 0.00022  | 0.00116 | 7      | RAF phosphorylates MEK                                                            |
| rctm0661 | 0.00022  | 0.00116 | 7      | MEK activation                                                                    |
| rctm0104 | 0.00023  | 0.00123 | 15     | Amine-derived hormones                                                            |
| M85      | 0.00023  | 0.00123 | 25     | Regulation of BAD phosphorylation                                                 |
| rctm1288 | 0.00024  | 0.00123 | 30     | Trafficking of AMPA receptors                                                     |
| rctm0062 | 0.00024  | 0.00123 | 30     | Activation of Kainate Receptors upon glutamate binding                            |
| rctm1142 | 0.00024  | 0.00127 | 11     | Signaling by NOTCH4                                                               |
| rctm1013 | 0.00026  | 0.00133 | 3      | Regulation of gap junction activity                                               |
| rctm0135 | 0.00027  | 0.00139 | 4      | Assembly of the RAD50-MRE11-NBS1 complex at DNA double-strand breaks              |
| rctm0057 | 0.00028  | 0.00143 | 25     | Activation of G protein gated Potassium channels                                  |
| rctm0110 | 0.00029  | 0.0015  | 2      | Amplification of signal from the kinetochores                                     |
| rctm0674 | 0.00029  | 0.00151 | 4      | MRN complex relocates to nuclear foci                                             |
| rctm1258 | 0.0003   | 0.00154 | 25     | Termination of O-glycan biosynthesis                                              |
| rctm0771 | 0.00031  | 0.00156 | 8      | Negative regulation of the PI3K/AKT network                                       |
| rctm1372 | 0.00033  | 0.00167 | 111    | WNT ligand biogenesis and trafficking                                             |
| rctm0032 | 0.00033  | 0.00169 | 4      | Abnormal metabolism in phenylketonuria                                            |
| rctm0838 | 0.00034  | 0.00171 | 28     | PKB-mediated events                                                               |
| M9257    | 0.00034  | 0.00173 | 68     | Drug metabolism - cytochrome P450                                                 |
| M2288    | 0.00035  | 0.00174 | 53     | NFAT and Hypertrophy of the heart (Transcription in the broken heart)             |
| rctm0005 | 0.00036  | 0.00179 | 26     | A tetrasaccharide linker sequence is required for GAG synthesis                   |

| MODULE   | P       | FDR     | NGENES | MODULE DESCRIPTION                                                                |
|----------|---------|---------|--------|-----------------------------------------------------------------------------------|
| rctm1409 | 0.00036 | 0.0018  | 82     | p75 NTR receptor-mediated signalling                                              |
| rctm1110 | 0.00036 | 0.0018  | 13     | Signal regulatory protein (SIRP) family interactions                              |
| rctm0048 | 0.00036 | 0.00181 | 3      | Activation of BMF and translocation to mitochondria                               |
| rctm1247 | 0.00037 | 0.00183 | 5      | Tachykinin receptors bind tachykinins                                             |
| rctm1112 | 0.00037 | 0.00183 | 13     | Signaling by Activin                                                              |
| rctm0828 | 0.00037 | 0.00183 | 67     | PI3K Cascade                                                                      |
| rctm0395 | 0.00037 | 0.00183 | 31     | FCGR activation                                                                   |
| rctm0818 | 0.0004  | 0.00194 | 3      | Oxygen-dependent Asparagine Hydroxylation of Hypoxia-inducible Factor Alpha       |
| rctm1209 | 0.0004  | 0.00194 | 33     | Synthesis of PIPs at the plasma membrane                                          |
| rctm1312 | 0.0004  | 0.00196 | 191    | Transmission across Chemical Synapses                                             |
| rctm0837 | 0.0004  | 0.00197 | 5      | PKA-mediated phosphorylation of key metabolic factors                             |
| rctm0007 | 0.00043 | 0.00207 | 36     | ABC-family proteins mediated transport                                            |
| M2064    | 0.00043 | 0.00207 | 17     | The 4-1BB-dependent immune response                                               |
| M7897    | 0.00046 | 0.00221 | 23     | Inhibition of Cellular Proliferation by Gleevec                                   |
| rctm0899 | 0.00046 | 0.00222 | 21     | Presynaptic function of Kainate receptors                                         |
| rctm0457 | 0.00048 | 0.00228 | 25     | G0 and Early G1                                                                   |
| M16817   | 0.00049 | 0.00234 | 112    | Oocyte meiosis                                                                    |
| M10628   | 0.00051 | 0.00241 | 20     | ATM Signaling Pathway                                                             |
| rctm1101 | 0.00051 | 0.00241 | 160    | Separation of Sister Chromatids                                                   |
| rctm0638 | 0.00054 | 0.00256 | 5      | LRR FLII-interacting protein 1 (LRRFIP1) activates type I IFN production          |
| rctm0258 | 0.00056 | 0.00263 | 61     | Collagen biosynthesis and modifying enzymes                                       |
| M1053    | 0.00057 | 0.00268 | 56     | Hedgehog signaling pathway                                                        |
| M16884   | 0.0006  | 0.0028  | 16     | Role of nicotinic acetylcholine receptors in the regulation of apoptosis          |
| M16811   | 0.0006  | 0.00282 | 18     | Role of Erk5 in Neuronal Survival                                                 |
| rctm1051 | 0.00062 | 0.00288 | 13     | Retrograde neurotrophin signalling                                                |
| rctm1265 | 0.00063 | 0.00295 | 16     | The canonical retinoid cycle in rods (twilight vision)                            |
| M16376   | 0.00063 | 0.00295 | 74     | Arrhythmogenic right ventricular cardiomyopathy (ARVC)                            |
| rctm0766 | 0.00065 | 0.00302 | 8      | Nef and signal transduction                                                       |
| M7272    | 0.00065 | 0.00303 | 116    | Parkinson's disease                                                               |
| rctm0500 | 0.00068 | 0.00312 | 31     | Gluconeogenesis                                                                   |
| rctm0738 | 0.00068 | 0.00313 | 20     | N-glycan antennae elongation in the medial/trans-Golgi                            |
| rctm1104 | 0.00072 | 0.00332 | 4      | Serotonin and melatonin biosynthesis                                              |
| rctm1037 | 0.00072 | 0.00332 | 15     | Repair synthesis of patch ~27-30 bases long by DNA polymerase                     |
| M6220    | 0.00075 | 0.00342 | 36     | Agrin in Postsynaptic Differentiation                                             |
| rctm0649 | 0.00075 | 0.00342 | 4      | Localization of the PINCH-ILK-PARVIN complex to focal adhesions                   |
| M15913   | 0.00075 | 0.00343 | 71     | RIG-I-like receptor signaling pathway                                             |
| M19613   | 0.00076 | 0.00345 | 23     | Multiple antiapoptotic pathways from IGF-1R signaling lead to BAD phosphorylation |
| M2821    | 0.00076 | 0.00345 | 24     | NFkB activation by Nontypeable Hemophilus influenzae                              |
| rctm0747 | 0.00078 | 0.0035  | 13     | NF-kB is activated and signals survival                                           |
| rctm1304 | 0.0008  | 0.0036  | 3      | Translesion synthesis by DNA polymerases bypassing lesion on DNA template         |
| rctm0641 | 0.00082 | 0.00368 | 33     | Latent infection of Homo sapiens with Mycobacterium tuberculosis                  |
| rctm0200 | 0.00082 | 0.00369 | 13     | CS/DS degradation                                                                 |
| rctm0354 | 0.00084 | 0.00377 | 26     | EGFR downregulation                                                               |
| rctm1243 | 0.00087 | 0.00388 | 3      | TWIK related potassium channel (TREK)                                             |
| rctm1246 | 0.00088 | 0.0039  | 2      | TWIK-related acid-sensitive K+ channel (TASK)                                     |
| M17400   | 0.00092 | 0.00408 | 37     | ALK in cardiac myocytes                                                           |
| M9011    | 0.00093 | 0.0041  | 44     | Vasopressin-regulated water reabsorption                                          |
| rctm0039 | 0.00094 | 0.00415 | 106    | Activated TLR4 signalling                                                         |
| M4383    | 0.00094 | 0.00415 | 30     | Actions of Nitric Oxide in the Heart                                              |
| M12836   | 0.00098 | 0.00428 | 19     | EPO Signaling Pathway                                                             |
| rctm0263 | 0.00098 | 0.00429 | 5      | Conjugation of SUMO to E1 (UBA2:SAE1)                                             |
| rctm0596 | 0.00098 | 0.0043  | 25     | Insulin receptor recycling                                                        |
| rctm0565 | 0.00101 | 0.00439 | 70     | ISG15 antiviral mechanism                                                         |
| rctm0514 | 0.00101 | 0.0044  | 38     | Glycosphingolipid metabolism                                                      |
| M3061    | 0.00103 | 0.00447 | 9      | Feeder Pathways for Glycolysis                                                    |
| rctm0919 | 0.00111 | 0.00482 | 16     | Proteolytic cleavage of SNARE complex proteins                                    |
| rctm0723 | 0.00113 | 0.00485 | 14     | Mitotic Telophase/Cytokinesis                                                     |
| rctm0209 | 0.00115 | 0.00493 | 11     | Calnexin/calreticulin cycle                                                       |
| rctm0310 | 0.00118 | 0.00508 | 48     | Deadenylation-dependent mRNA decay                                                |
| rctm1308 | 0.00131 | 0.00559 | 2      | Translocation of BoNT Light chain                                                 |
| M225     | 0.00133 | 0.00567 | 19     | Downregulated of MTA-3 in ER-negative Breast Tumors                               |
| M11844   | 0.00135 | 0.00577 | 56     | Cytosolic DNA-sensing pathway                                                     |
| rctm1036 | 0.00138 | 0.00586 | 15     | Repair synthesis for gap-filling by DNA polymerase in TC-NER                      |
| M2044    | 0.00139 | 0.00589 | 124    | Spliceosome                                                                       |
| rctm1159 | 0.00144 | 0.0061  | 3      | Signalling to STAT3                                                               |
| rctm0159 | 0.00148 | 0.00626 | 3      | Beta oxidation of myristoyl-CoA to lauroyl-CoA                                    |
| rctm1132 | 0.0015  | 0.00632 | 18     | Signaling by NODAL                                                                |
| M18312   | 0.00155 | 0.00653 | 25     | Maturity onset diabetes of the young                                              |
| rctm0128 | 0.00161 | 0.00674 | 48     | Arachidonic acid metabolism                                                       |
| rctm0405 | 0.00162 | 0.00678 | 7      | FGFR3b ligand binding and activation                                              |
| M13158   | 0.00163 | 0.00679 | 15     | The IGF-1 Receptor and Longevity                                                  |

| MODULE   | P       | FDR     | NGENES | MODULE DESCRIPTION                                                                         |
|----------|---------|---------|--------|--------------------------------------------------------------------------------------------|
| M1724    | 0.00165 | 0.00686 | 29     | RNA polymerase                                                                             |
| rctm0246 | 0.00169 | 0.00701 | 243    | Class I MHC mediated antigen processing & presentation                                     |
| M19943   | 0.0017  | 0.00706 | 22     | Ceramide Signaling Pathway                                                                 |
| rctm1399 | 0.00176 | 0.00726 | 27     | mTOR signalling                                                                            |
| rctm0257 | 0.00176 | 0.00727 | 10     | Cohesin Loading onto Chromatin                                                             |
| rctm1194 | 0.00181 | 0.00742 | 25     | Synthesis of IP3 and IP4 in the cytosol                                                    |
| rctm0455 | 0.00181 | 0.00743 | 28     | G-protein beta:gamma signalling                                                            |
| rctm0675 | 0.00182 | 0.00743 | 83     | Meiosis                                                                                    |
| M12095   | 0.00184 | 0.00751 | 33     | Signal transduction through IL1R                                                           |
| rctm0071 | 0.00197 | 0.00801 | 4      | Activation of PUMA and translocation to mitochondria                                       |
| rctm0119 | 0.00198 | 0.00802 | 70     | Antiviral mechanism by IFN-stimulated genes                                                |
| rctm1141 | 0.00198 | 0.00802 | 11     | Signaling by NOTCH3                                                                        |
| M19358   | 0.00208 | 0.00842 | 37     | Signaling of Hepatocyte Growth Factor Receptor                                             |
| rctm0133 | 0.00209 | 0.00843 | 54     | Assembly of collagen fibrils and other multimeric structures                               |
| M19895   | 0.00209 | 0.00843 | 24     | Nicotinate and nicotinamide metabolism                                                     |
| rctm0636 | 0.0021  | 0.00845 | 93     | LICAM interactions                                                                         |
| rctm1397 | 0.00218 | 0.00875 | 104    | mRNA Splicing - Major Pathway                                                              |
| rctm0511 | 0.00219 | 0.00876 | 26     | Glycolysis                                                                                 |
| rctm0779 | 0.00229 | 0.00911 | 7      | Neurotransmitter Clearance In The Synaptic Cleft                                           |
| M12975   | 0.00229 | 0.00912 | 29     | VEGF, Hypoxia, and Angiogenesis                                                            |
| rctm0850 | 0.00231 | 0.00918 | 26     | Pausing and recovery of Tat-mediated HIV elongation                                        |
| M13720   | 0.00235 | 0.0093  | 44     | Lysine degradation                                                                         |
| rctm1098 | 0.00239 | 0.00944 | 24     | Sema4D induced cell migration and growth-cone collapse                                     |
| rctm1250 | 0.00243 | 0.00957 | 12     | Tandem pore domain potassium channels                                                      |
| rctm0604 | 0.00245 | 0.00965 | 10     | Interaction With The Zona Pellucida                                                        |
| M19888   | 0.00257 | 0.01008 | 57     | Acute myeloid leukemia                                                                     |
| rctm0698 | 0.00267 | 0.01048 | 25     | Metal ion SLC transporters                                                                 |
| rctm0623 | 0.00273 | 0.01069 | 31     | Inwardly rectifying K+ channels                                                            |
| rctm1262 | 0.00279 | 0.01089 | 3      | The NLRP1 inflammasome                                                                     |
| M7552    | 0.0028  | 0.01089 | 18     | Role of EGF Receptor Transactivation by GPCRs in Cardiac Hypertrophy                       |
| rctm0336 | 0.00284 | 0.01104 | 12     | Dopamine Neurotransmitter Release Cycle                                                    |
| rctm1067 | 0.00289 | 0.01122 | 9      | S6K1-mediated signalling                                                                   |
| M10183   | 0.00294 | 0.01137 | 16     | Acetylation and Deacetylation of RelA in The Nucleus                                       |
| rctm0647 | 0.00296 | 0.01141 | 48     | Lipid digestion, mobilization, and transport                                               |
| rctm0415 | 0.00298 | 0.01147 | 173    | Fatty acid, triacylglycerol, and ketone body metabolism                                    |
| rctm0849 | 0.00305 | 0.01173 | 27     | Pausing and recovery of HIV elongation                                                     |
| rctm1251 | 0.00308 | 0.01183 | 26     | Tat-mediated HIV elongation arrest and recovery                                            |
| rctm0940 | 0.00316 | 0.01209 | 44     | RNA Polymerase I Chain Elongation                                                          |
| rctm0936 | 0.00321 | 0.01226 | 10     | RAF/MAP kinase cascade                                                                     |
| rctm0768 | 0.00324 | 0.01233 | 9      | Nef mediated downregulation of MHC class I complex cell surface expression                 |
| rctm1074 | 0.00324 | 0.01234 | 17     | SHC-related events                                                                         |
| rctm0526 | 0.00326 | 0.01236 | 27     | HIV elongation arrest and recovery                                                         |
| rctm0107 | 0.00327 | 0.01237 | 16     | Amino acid synthesis and interconversion (transamination)                                  |
| rctm1044 | 0.00334 | 0.01262 | 99     | Resolution of Sister Chromatid Cohesion                                                    |
| M7860    | 0.00336 | 0.01266 | 18     | Nerve growth factor pathway (NGF)                                                          |
| M15285   | 0.00338 | 0.01268 | 23     | NF-kB Signaling Pathway                                                                    |
| rctm0409 | 0.00338 | 0.01268 | 37     | FRS2-mediated cascade                                                                      |
| rctm1155 | 0.00339 | 0.01271 | 277    | Signalling by NGF                                                                          |
| rctm0030 | 0.0034  | 0.01271 | 10     | Abacavir transport and metabolism                                                          |
| rctm1296 | 0.00342 | 0.01276 | 77     | Transcriptional Regulation of White Adipocyte Differentiation                              |
| rctm1236 | 0.00353 | 0.01313 | 24     | TRAF6 mediated NF-kB activation                                                            |
| rctm0501 | 0.00361 | 0.01342 | 61     | Glucose metabolism                                                                         |
| rctm1254 | 0.00364 | 0.01351 | 6      | Telomere C-strand synthesis initiation                                                     |
| M5202    | 0.00369 | 0.01366 | 22     | Hypoxia and p53 in the Cardiovascular system                                               |
| M16848   | 0.00371 | 0.01368 | 68     | Epithelial cell signaling in Helicobacter pylori infection                                 |
| rctm0485 | 0.00372 | 0.01369 | 11     | Gamma-carboxylation, transport, and amino-terminal cleavage of proteins                    |
| rctm0086 | 0.00378 | 0.01389 | 17     | Acyl chain remodelling of PG                                                               |
| M8601    | 0.0039  | 0.0143  | 23     | Rac 1 cell motility signaling pathway                                                      |
| rctm0944 | 0.00394 | 0.01443 | 52     | RNA Polymerase I Transcription                                                             |
| rctm1317 | 0.00403 | 0.0147  | 53     | Transport of Mature Transcript to Cytoplasm                                                |
| rctm0221 | 0.00413 | 0.01504 | 60     | Cell death signalling via NRAGE, NRIF and NADE                                             |
| rctm1170 | 0.00417 | 0.01518 | 64     | Sphingolipid metabolism                                                                    |
| rctm0306 | 0.00419 | 0.0152  | 6      | DNA replication initiation                                                                 |
| M12399   | 0.00449 | 0.01627 | 12     | Cystic Fibrosis Transmembrane Conductance Regulator And Beta 2 Adrenergic Receptor Pathway |
| rctm0476 | 0.00471 | 0.01704 | 428    | GPCR ligand binding                                                                        |
| rctm0869 | 0.00474 | 0.01705 | 4      | Plasmalogen biosynthesis                                                                   |
| M2529    | 0.00474 | 0.01705 | 32     | PDGF Signaling Pathway                                                                     |
| rctm0147 | 0.00477 | 0.01714 | 4      | Axonal growth stimulation                                                                  |
| rctm1103 | 0.00481 | 0.01718 | 12     | Serotonin Neurotransmitter Release Cycle                                                   |
| rctm0844 | 0.00481 | 0.01719 | 109    | PPARA Activates Gene Expression                                                            |

| MODULE   | P       | FDR     | NGENES | MODULE DESCRIPTION                                                                         |
|----------|---------|---------|--------|--------------------------------------------------------------------------------------------|
| rctm0372 | 0.00481 | 0.0172  | 27     | Elongation arrest and recovery                                                             |
| M4377    | 0.00489 | 0.01744 | 26     | Galactose metabolism                                                                       |
| rctm1210 | 0.00492 | 0.01751 | 2      | Synthesis of PS                                                                            |
| rctm0810 | 0.00504 | 0.01785 | 8      | Opsins                                                                                     |
| rctm0438 | 0.00504 | 0.01785 | 27     | Formation of transcription-coupled NER (TC-NER) repair complex                             |
| rctm1086 | 0.00505 | 0.01786 | 14     | SOS-mediated signalling                                                                    |
| rctm0142 | 0.00507 | 0.01789 | 60     | Autodegradation of Cdh1 by Cdh1:APC/C                                                      |
| rctm0678 | 0.00511 | 0.01798 | 176    | Membrane Trafficking                                                                       |
| rctm0375 | 0.00517 | 0.01816 | 3      | Endosomal/Vacuolar pathway                                                                 |
| rctm1229 | 0.00522 | 0.01829 | 29     | TGF-beta receptor signaling activates SMADs                                                |
| rctm1200 | 0.00523 | 0.0183  | 28     | Synthesis of PA                                                                            |
| rctm0598 | 0.00526 | 0.01834 | 103    | Integration of energy metabolism                                                           |
| M7857    | 0.00527 | 0.01835 | 13     | Non-homologous end-joining                                                                 |
| rctm0891 | 0.00527 | 0.01837 | 99     | Potassium Channels                                                                         |
| rctm1320 | 0.00534 | 0.01855 | 35     | Transport of Mature mRNAs Derived from Intronless Transcripts                              |
| M15926   | 0.00555 | 0.01922 | 21     | Trefoil Factors Initiate Mucosal Healing                                                   |
| rctm1293 | 0.00569 | 0.01969 | 55     | Transcription of the HIV genome                                                            |
| M89      | 0.00581 | 0.02007 | 11     | Phosphorylation of MEK1 by cdk5/p35 down regulates the MAP kinase pathway                  |
| rctm0284 | 0.00598 | 0.0206  | 37     | Cyclin D associated events in G1                                                           |
| rctm1143 | 0.00607 | 0.02087 | 175    | Signaling by PDGF                                                                          |
| rctm0271 | 0.0061  | 0.02093 | 57     | Constitutive Signaling by NOTCH1 PEST Domain Mutants                                       |
| rctm0397 | 0.00612 | 0.02096 | 14     | FGFR1 ligand binding and activation                                                        |
| rctm0141 | 0.00613 | 0.02099 | 7      | Attachment of GPI anchor to uPAR                                                           |
| rctm0947 | 0.00625 | 0.02132 | 92     | RNA Polymerase I, RNA Polymerase III, and Mitochondrial Transcription                      |
| M11911   | 0.00633 | 0.02156 | 44     | ABC transporters                                                                           |
| rctm0740 | 0.00639 | 0.02171 | 13     | N-glycan trimming in the ER and Calnexin/Calreticulin cycle                                |
| rctm1403 | 0.0066  | 0.0224  | 15     | p130Cas linkage to MAPK signaling for integrins                                            |
| M8492    | 0.00673 | 0.02279 | 86     | Apoptosis                                                                                  |
| M14863   | 0.00698 | 0.0236  | 16     | p53 Signaling Pathway                                                                      |
| rctm0714 | 0.007   | 0.02361 | 171    | Mitotic Anaphase                                                                           |
| rctm0979 | 0.00726 | 0.02444 | 27     | Recycling pathway of L1                                                                    |
| rctm1097 | 0.00733 | 0.02463 | 26     | Sema4D in semaphorin signaling                                                             |
| M1909    | 0.00741 | 0.02484 | 31     | EGF Signaling Pathway                                                                      |
| M11190   | 0.00799 | 0.02676 | 24     | Dorso-ventral axis formation                                                               |
| M18937   | 0.00822 | 0.02746 | 43     | Nucleotide excision repair                                                                 |
| M13191   | 0.00827 | 0.02754 | 89     | Prostate cancer                                                                            |
| M1547    | 0.00828 | 0.02756 | 29     | Control of skeletal myogenesis by HDAC and calcium/calmodulin-dependent kinase (CaMK)      |
| rctm0302 | 0.00831 | 0.0276  | 3      | DNA Damage Reversal                                                                        |
| rctm0269 | 0.00834 | 0.02765 | 15     | Constitutive Signaling by NOTCH1 HD Domain Mutants                                         |
| rctm0732 | 0.00847 | 0.02803 | 78     | MyD88 cascade initiated on plasma membrane                                                 |
| rctm1120 | 0.00864 | 0.02853 | 43     | Signaling by FGFR mutants                                                                  |
| rctm0618 | 0.0087  | 0.02869 | 43     | Interleukin-3, 5 and GM-CSF signaling                                                      |
| rctm0349 | 0.00873 | 0.02874 | 27     | Dual incision reaction in TC-NER                                                           |
| rctm0750 | 0.00877 | 0.02876 | 197    | NGF signalling via TRKA from the plasma membrane                                           |
| rctm1336 | 0.00877 | 0.02876 | 11     | Tryptophan catabolism                                                                      |
| rctm0648 | 0.00881 | 0.02884 | 29     | Lipoprotein metabolism                                                                     |
| M3618    | 0.00894 | 0.02921 | 29     | TNFR1 Signaling Pathway                                                                    |
| rctm0528 | 0.00905 | 0.02951 | 21     | HS-GAG degradation                                                                         |
| rctm0720 | 0.00929 | 0.03025 | 107    | Mitotic Prometaphase                                                                       |
| rctm0278 | 0.00941 | 0.03056 | 7      | Cross-presentation of particulate exogenous antigens (phagosomes)                          |
| rctm1091 | 0.00946 | 0.03067 | 19     | Scavenging by Class A Receptors                                                            |
| rctm0231 | 0.00953 | 0.03086 | 8      | ChREBP activates metabolic gene expression                                                 |
| rctm0784 | 0.00955 | 0.03086 | 8      | Nicotinate metabolism                                                                      |
| rctm0130 | 0.00964 | 0.03108 | 85     | Asparagine N-linked glycosylation                                                          |
| M12985   | 0.00975 | 0.03138 | 15     | TACI and BCMA stimulation of B cell immune responses.                                      |
| rctm1144 | 0.01026 | 0.03295 | 116    | Signaling by Rho GTPases                                                                   |
| rctm0303 | 0.0103  | 0.03303 | 104    | DNA Repair                                                                                 |
| rctm1008 | 0.01046 | 0.03348 | 43     | Regulation of Water Balance by Renal Aquaporins                                            |
| rctm1315 | 0.0107  | 0.03412 | 2      | Transport of Glycerol from Adipocytes to the Liver by Aquaporins                           |
| rctm0802 | 0.0107  | 0.03412 | 48     | Nucleotide Excision Repair                                                                 |
| rctm0708 | 0.0109  | 0.03466 | 9      | Mitochondrial Iron-Sulfur Cluster Biogenesis                                               |
| M16853   | 0.01091 | 0.03469 | 36     | DNA replication                                                                            |
| M3075    | 0.01094 | 0.0347  | 11     | Granzyme A mediated Apoptosis Pathway                                                      |
| M523     | 0.01132 | 0.03584 | 29     | Thyroid cancer                                                                             |
| rctm0521 | 0.0115  | 0.03634 | 15     | HDL-mediated lipid transport                                                               |
| rctm0237 | 0.01198 | 0.0378  | 48     | Chondroitin sulfate/dermatan sulfate metabolism                                            |
| rctm0170 | 0.01203 | 0.03789 | 8      | Binding of RNA by Insulin-like Growth Factor-2 mRNA Binding Proteins (IGF2BPs/IMPs/VICKZs) |
| M15955   | 0.0124  | 0.03898 | 39     | Sphingolipid metabolism                                                                    |
| rctm0404 | 0.01245 | 0.03909 | 11     | FGFR3 ligand binding and activation                                                        |
| rctm0627 | 0.01254 | 0.03929 | 39     | Iron uptake and transport                                                                  |

| MODULE   | P       | FDR     | NGENES | MODULE DESCRIPTION                                                                                       |
|----------|---------|---------|--------|----------------------------------------------------------------------------------------------------------|
| rctm1011 | 0.01315 | 0.04113 | 32     | Regulation of beta-cell development                                                                      |
| rctm0124 | 0.01343 | 0.04191 | 52     | Apoptotic execution phase                                                                                |
| rctm0726 | 0.01351 | 0.04212 | 2      | Monoamines are oxidized to aldehydes by MAOA and MAOB, producing NH3 and H2O2                            |
| rctm0022 | 0.0139  | 0.04325 | 69     | APC/C:Cdh1 mediated degradation of Cdc20 and other APC/C:Cdh1 targeted proteins in late mitosis/early G1 |
| M15258   | 0.01416 | 0.04399 | 22     | AKT Signaling Pathway                                                                                    |
| rctm0289 | 0.01424 | 0.04416 | 260    | Cytokine Signaling in Immune system                                                                      |
| rctm1066 | 0.01441 | 0.0446  | 5      | S6K1 signalling                                                                                          |
| rctm0108 | 0.01449 | 0.04476 | 31     | Amino acid transport across the plasma membrane                                                          |
| M8560    | 0.01498 | 0.04618 | 24     | Cell Cycle: G2/M Checkpoint                                                                              |
| M17857   | 0.01537 | 0.04731 | 37     | SNARE interactions in vesicular transport                                                                |
| rctm0729 | 0.01549 | 0.04753 | 7      | Multifunctional anion exchangers                                                                         |
| M19118   | 0.01549 | 0.04754 | 46     | Keratinocyte Differentiation                                                                             |
| rctm0236 | 0.0157  | 0.04809 | 20     | Chondroitin sulfate biosynthesis                                                                         |
| rctm1206 | 0.01611 | 0.04924 | 17     | Synthesis of PIPs at the Golgi membrane                                                                  |
| rctm1032 | 0.0163  | 0.04975 | 9      | Removal of aminoterminal propeptides from gamma-carboxylated proteins                                    |

P: module enrichment significance, FDR: Benjamini-Hochberg false discovery rate, NGENES: number of genes tested for enrichment

**Supplementary Table 20 The weighted key driver analysis (wKDA) using the Bayesian brain network**

| MODULE   | NODE     | P        | FDR      | N.mod | N.neigh | N.obsrv | N.expc | MEMBER | FILL | FOLD   | DESCR                                            |
|----------|----------|----------|----------|-------|---------|---------|--------|--------|------|--------|--------------------------------------------------|
| rctm0388 | FMOD     | 1.15E-16 | 6.77E-15 | 190   | 73      | 14      | 0.48   | TRUE   | 0.19 | 29.45  | Extracellular matrix organization                |
| rctm0476 | NTS      | 3.01E-11 | 8.87E-10 | 348   | 35      | 12      | 0.42   | TRUE   | 0.34 | 28.75  | G-protein-coupled receptor (GPCR) ligand binding |
| rctm0388 | ISLR     | 5.13E-11 | 1.01E-09 | 190   | 34      | 11      | 0.22   | FALSE  | 0.32 | 49.69  | Extracellular matrix organization                |
| rctm0388 | COL3A1   | 8.06E-11 | 1.19E-09 | 190   | 36      | 11      | 0.23   | TRUE   | 0.31 | 46.93  | Extracellular matrix organization                |
| rctm0388 | SLC13A4  | 2.38E-10 | 2.80E-09 | 190   | 50      | 11      | 0.33   | FALSE  | 0.22 | 33.79  | Extracellular matrix organization                |
| M7098    | FMOD     | 1.06E-06 | 1.04E-05 | 78    | 73      | 9       | 0.20   | FALSE  | 0.12 | 46.12  | Extracellular matrix (ECM)-receptor interaction  |
| rctm0388 | SERPING1 | 9.19E-06 | 6.81E-05 | 190   | 54      | 9       | 0.35   | FALSE  | 0.17 | 25.60  | Extracellular matrix organization                |
| rctm0476 | ESR1     | 9.23E-06 | 6.81E-05 | 348   | 31      | 9       | 0.37   | FALSE  | 0.29 | 24.34  | G-protein-coupled receptor (GPCR) ligand binding |
| rctm0388 | PCOLCE   | 1.12E-05 | 7.33E-05 | 190   | 63      | 9       | 0.41   | TRUE   | 0.14 | 21.94  | Extracellular matrix organization                |
| rctm0388 | COL1A2   | 9.70E-05 | 5.72E-04 | 190   | 32      | 8       | 0.21   | TRUE   | 0.25 | 38.39  | Extracellular matrix organization                |
| rctm0476 | GAL      | 3.58E-04 | 1.92E-03 | 348   | 25      | 8       | 0.30   | TRUE   | 0.32 | 26.83  | G-protein-coupled receptor (GPCR) ligand binding |
| rctm0476 | CALCR    | 9.10E-04 | 4.47E-03 | 348   | 35      | 8       | 0.42   | TRUE   | 0.23 | 19.17  | G-protein-coupled receptor (GPCR) ligand binding |
| M7253    | FMOD     | 1.13E-03 | 5.04E-03 | 172   | 73      | 8       | 0.43   | FALSE  | 0.11 | 18.59  | Focal adhesion                                   |
| rctm0476 | ECEL1    | 1.20E-03 | 5.04E-03 | 348   | 34      | 8       | 0.41   | FALSE  | 0.24 | 19.73  | G-protein-coupled receptor (GPCR) ligand binding |
| rctm0686 | KNG1     | 2.56E-03 | 9.29E-03 | 405   | 48      | 8       | 0.67   | FALSE  | 0.17 | 12.01  | Metabolism of lipids and lipoproteins            |
| rctm0289 | RTP4     | 2.58E-03 | 9.29E-03 | 197   | 26      | 7       | 0.18   | FALSE  | 0.27 | 39.88  | Cytokine signaling in immune system              |
| rctm0648 | KNG1     | 2.72E-03 | 9.29E-03 | 24    | 48      | 6       | 0.04   | FALSE  | 0.13 | 151.98 | Lipoprotein metabolism                           |
| rctm0476 | ARHGAP6  | 2.83E-03 | 9.29E-03 | 348   | 63      | 8       | 0.75   | FALSE  | 0.13 | 10.65  | G-protein-coupled receptor (GPCR) ligand binding |
| rctm0259 | FMOD     | 3.08E-03 | 9.57E-03 | 73    | 73      | 7       | 0.18   | FALSE  | 0.10 | 38.33  | Collagen formation                               |
| rctm0289 | IFIT1    | 3.97E-03 | 1.17E-02 | 197   | 30      | 7       | 0.20   | TRUE   | 0.23 | 34.56  | Cytokine Signaling in Immune system              |
| rctm0476 | BRS3     | 6.19E-03 | 1.74E-02 | 348   | 19      | 7       | 0.23   | TRUE   | 0.37 | 30.89  | G-protein-coupled receptor (GPCR) ligand binding |
| rctm0258 | ISLR     | 9.21E-03 | 2.41E-02 | 53    | 34      | 6       | 0.06   | FALSE  | 0.18 | 97.16  | Collagen biosynthesis and modifying enzymes      |
| rctm0647 | KNG1     | 9.41E-03 | 2.41E-02 | 39    | 48      | 6       | 0.06   | FALSE  | 0.13 | 93.53  | Lipid digestion, mobilization, and transport     |
| rctm0259 | ISLR     | 1.29E-02 | 3.16E-02 | 73    | 34      | 6       | 0.09   | FALSE  | 0.18 | 70.54  | Collagen formation                               |
| rctm0388 | SLC6A20  | 1.65E-02 | 3.90E-02 | 190   | 50      | 7       | 0.33   | FALSE  | 0.14 | 21.50  | Extracellular matrix organization                |
| M7098    | COL3A1   | 2.13E-02 | 4.83E-02 | 78    | 36      | 6       | 0.10   | TRUE   | 0.17 | 62.35  | Extracellular matrix (ECM)-receptor interaction  |
| rctm1162 | TAGLN    | 2.25E-02 | 4.91E-02 | 20    | 15      | 5       | 0.01   | FALSE  | 0.33 | 486.33 | Smooth muscle contraction                        |

Node: key driver gene tested, P: subnetwork enrichment significance, FDR: Benjamini-Hochberg false discovery rate, N.mod: number of genes in subnetwork, N.neigh: number of genes in the neighborhood of the key driver in the tissue network, N.obsrv: Number of observed genes shared between the subnetwork and the neighborhood, N.expc: expected number of shared genes, MEMBER: indicates if the key driver is part of the subnetwork, FILL: ratio of subnetwork genes in the neighborhood, and FOLD: fold change of subnetwork genes compared to the expectation.

**Supplemental Table 21 Genes mapped to genetic, epigenetic, transcriptional associations used for enrichment in the Mergeomics analysis**

|                                                                                                                                                                                                                                                                                                                                                                                                                                                                                                                                                                                                                                                                                                                                                                                                                                                                                                                                                                                                                                                                                                                                                                                                                                                                                                                                                                                                                                                                                                                                                                                                                                                                                                                                                                                                                                                            |
|------------------------------------------------------------------------------------------------------------------------------------------------------------------------------------------------------------------------------------------------------------------------------------------------------------------------------------------------------------------------------------------------------------------------------------------------------------------------------------------------------------------------------------------------------------------------------------------------------------------------------------------------------------------------------------------------------------------------------------------------------------------------------------------------------------------------------------------------------------------------------------------------------------------------------------------------------------------------------------------------------------------------------------------------------------------------------------------------------------------------------------------------------------------------------------------------------------------------------------------------------------------------------------------------------------------------------------------------------------------------------------------------------------------------------------------------------------------------------------------------------------------------------------------------------------------------------------------------------------------------------------------------------------------------------------------------------------------------------------------------------------------------------------------------------------------------------------------------------------|
| <b>(Source) Gene list by each significant module in Supplementary Table 20</b>                                                                                                                                                                                                                                                                                                                                                                                                                                                                                                                                                                                                                                                                                                                                                                                                                                                                                                                                                                                                                                                                                                                                                                                                                                                                                                                                                                                                                                                                                                                                                                                                                                                                                                                                                                             |
| <b>M7098: ECM-receptor interaction</b>                                                                                                                                                                                                                                                                                                                                                                                                                                                                                                                                                                                                                                                                                                                                                                                                                                                                                                                                                                                                                                                                                                                                                                                                                                                                                                                                                                                                                                                                                                                                                                                                                                                                                                                                                                                                                     |
| (TWAS) ITGAV, COL2A1, COL6A2, COL4A6 (EWAS) ITGB1, COL3A1, ITGA4, COL6A1, LAMA1, VTN, SV2A, COL5A3, CHAD, THBS1, ITGA2, VWF, ITGB3, FN1, GP5, COL6A6, CD36, COL11A2, CD44, AGRN, THBS2 (GWAS) LAMA3, ITGA8, SDC1, COL1A2, TNC, HSPG2, LAMC1, ITGB7, GP6, ITGA3, THBS4, SV2C, COL4A4, IBSP, CD47, HMMR, TNN, LAMB3, LAMC2, COL1A1, SV2B, SDC2, COL6A3, SPP1, THBS3, LAMA5, LAMC3, RELN, TNXB, COMP, COL11A1, ITGA5, GP9, LAMA2, ITGB5, ITGA10, ITGA6, COL4A2, GP1BA, ITGB4, LAMA4, ITGA1, GP1BB, ITGA2B, ITGA11, SDC4, COL5A2, ITGA9, LAMB2, ITGB8, COL5A1, DAG1, SDC3, ITGB6, LAMB1, LAMB4, ITGA7, TNR, COL4A1                                                                                                                                                                                                                                                                                                                                                                                                                                                                                                                                                                                                                                                                                                                                                                                                                                                                                                                                                                                                                                                                                                                                                                                                                                             |
| <b>M7253: Focal adhesion</b>                                                                                                                                                                                                                                                                                                                                                                                                                                                                                                                                                                                                                                                                                                                                                                                                                                                                                                                                                                                                                                                                                                                                                                                                                                                                                                                                                                                                                                                                                                                                                                                                                                                                                                                                                                                                                               |
| (TWAS) ITGAV, RAC1, VAV2, BIRC3, COL2A1, MAPK3, MYLK3, COL6A2, PAK3, XIAP, FIGF, ELK1, COL4A6, FLNA (EWAS) KDR, PGF, ITGB1, PIK3R1, PTEN, ZYX, COL3A1, RAC3, MYL9, PDGFA, ITGA4, COL6A1, CRK, LAMA1, VEGFA, GRB2, MYL7, PDPK1, MYLPF, VTN, PPP1CA, COL5A3, VEGFC, CHAD, THBS1, ITGA2, PPP1CB, SHC2, PIK3R2, VWF, ITGB3, MYLK, ILK, FN1, PIK3CA, RAF1, CCND2, COL6A6, AKT2, CAV2, COL11A2, ACTN3, CCND1, PIK3R5, PIK3CD, PAK1, SHC4, RHOA, CTNNB1, CAV1, THBS2, PDGFRA, ROCK1, PRKCA, PRKCG, ACTG1, FLT1 (GWAS) RAPIA, PPP1R12A, HGF, LAMA3, DOCK1, BIRC2, ACTN2, EGF, SHC3, EGFR, HRAS, MAPK9, ITGA8, SOS1, COL1A2, TNC, PXN, MYL12A, MYL12B, LAMC1, ITGB7, CDC42, JUN, IGF1, PAK6, RASGRF1, ITGA3, BCL2, ACTN4, PIP5K1C, THBS4, PDGFRB, COL4A4, PARVB, PARVG, IBSP, PAK7, ACTN1, PDGFD, MAPK10, PTK2, GSK3B, SHC1, TLN1, CAPN2, TNN, LAMB3, PAK2, BAD, VEGFB, LAMC2, COL1A1, VCL, VAV1, VASP, MAPK8, RAPIB, COL6A3, SPP1, RAPGEF1, THBS3, FLNC, ACTB, VAV3, LAMA5, LAMC3, MYL2, RELN, TNXB, COMP, ERBB2, COL11A1, FLNB, DIAPH1, ITGA5, SOS2, MET, LAMA2, PARVA, PIK3R3, ITGB5, CAV3, MYL5, TLN2, IGF1R, ITGA10, ITGA6, PAK4, COL4A2, ITGB4, LAMA4, PPP1CC, PRKCB, ITGA1, CRKL, ITGA2B, ITGA11, SRC, MYLK2, PIK3CB, GRLF1, COL5A2, ITGA9, LAMB2, ITGB8, COL5A1, ROCK2, ITGB6, FYN, BRAF, ARHGAP5, MAP2K1, MAPK1, LAMB1, LAMB4, AKT1, AKT3, MYL10, RAC2, FLT4, ITGA7, PIK3CG, TNR, BCAR1, CCND3, COL4A1, PDGFB, PDGFC                                                                                                                                                                                                                                                                                                                                                                                                                                       |
| <b>rctm0258: Collagen biosynthesis and modifying enzymes</b>                                                                                                                                                                                                                                                                                                                                                                                                                                                                                                                                                                                                                                                                                                                                                                                                                                                                                                                                                                                                                                                                                                                                                                                                                                                                                                                                                                                                                                                                                                                                                                                                                                                                                                                                                                                               |
| (TWAS) COL6A5, COL2A1, COL6A2, COL4A5, COL4A6 (EWAS) COL3A1, PLOD3, COL6A1, COL5A3, CRTAP, COL16A1, PLOD1, COL20A1, COL6A6, COL25A1, LEPRE1, COL11A2, TLL2, TLL1, BMP1, COL24A1, P4HB, ADAMTS3, COL18A1 (GWAS) COL21A1, COL28A1, COL15A1, COL13A1, ADAMTS14, COL1A2, COL19A1, COL9A1, COL17A1, COL4A4, COL23A1, PLOD2, COL10A1, COL14A1, COL1A1, COL12A1, COL6A3, ADAMTS2, COL11A1, PCOLCE, PCOLCE2, COL22A1, COL4A2, PPIB, COL9A3, COL5A2, COL7A1, COL4A3, COL5A1, SERPINH1, COL9A2, COL8A1, LEPREL2, COL8A2, LEPREL1, COL27A1, COL4A1                                                                                                                                                                                                                                                                                                                                                                                                                                                                                                                                                                                                                                                                                                                                                                                                                                                                                                                                                                                                                                                                                                                                                                                                                                                                                                                    |
| <b>rctm0259: Collagen formation</b>                                                                                                                                                                                                                                                                                                                                                                                                                                                                                                                                                                                                                                                                                                                                                                                                                                                                                                                                                                                                                                                                                                                                                                                                                                                                                                                                                                                                                                                                                                                                                                                                                                                                                                                                                                                                                        |
| (TWAS ) COL6A5, PLEC, COL2A1, COL6A2, COL4A5, COL4A6 (EWAS) COL3A1, PLOD3, COL6A1, COL5A3, CRTAP, COL16A1, LOXL3, PLOD1, COL20A1, COL6A6, COL25A1, LEPRE1, COL11A2, DST, TLL2, TLL1, BMP1, COL24A1, P4HB, ADAMTS3, COL18A1 (GWAS) COL21A1, COL28A1, LAMA3, LOX, COL15A1, COL13A1, ADAMTS14, LOXL2, LOXL4, MMP3, COL1A2, COL19A1, COL9A1, COL17A1, CTSL2, MMP20, COL4A4, MMP7, CTSB, COL23A1, PLOD2, COL10A1, LAMB3, COL14A1, LAMC2, COL1A1, COL12A1, COL6A3, ADAMTS2, COL11A1, CTSS, PCOLCE, PCOLCE2, ITGA6, COL22A1, COL4A2, ITGB4, PPIB, CTSL1, COL9A3, LOXL1, CD151, COL5A2, COL7A1, COL4A3, COL5A1, SERPINH1, COL9A2, COL8A1, MMP13, LEPREL2, COL8A2, MMP9, LEPREL1, COL27A1, COL4A1                                                                                                                                                                                                                                                                                                                                                                                                                                                                                                                                                                                                                                                                                                                                                                                                                                                                                                                                                                                                                                                                                                                                                                   |
| <b>rctm0289: Cytokine Signaling in Immune system</b>                                                                                                                                                                                                                                                                                                                                                                                                                                                                                                                                                                                                                                                                                                                                                                                                                                                                                                                                                                                                                                                                                                                                                                                                                                                                                                                                                                                                                                                                                                                                                                                                                                                                                                                                                                                                       |
| (TWAS) GBP6, FCGR1A, GBP5, IL5RA, TAB2, IFNA6, NCAM1, PTPN11, CIITA, IRF8, MAPK3, JAK3, IFNAR1, TAB1, IKBKG, TAB3, IL2RG, IRAK1 (EWAS) IFNA14, PPM1B, RBX1, TNIP2, SKP1, NFKB2, SH2B1, NUP210, PIK3R1, CHUK, ADAR, NUP93, CAMK2G, GAB2, CRK, STAT2, GRB2, ADAM17, IFIT1, IFIT3, LCK, ISG15, IRF9, NUP43, GHR, NUP155, CUL1, PIK3R2, RAE1, STAT5B, KPNB1, IFI27, IKBKB, IFI30, OAS2, RANBP2, IFI6, TOLLIP, IRF5, GBP2, PIK3CA, GBP4, HERC5, IFNGR2, CDK1, RAF1, TYK2, NUP85, EIF4G2, STAT1, RIPK2, IRAK2, MT2A, MAP3K7, NUP133, UBE2E1, PELI2, IRAK3, NOD2, IFNA7, KPNA4, CD44, MAP2K2, EGR1, IFITM3, NUP153, STAT5A, IL1A, IL7, NUP98, PIK3CD, IRS1, KPNA7, KPNA2, JAK2, IFITM1, IFITM2, PTAFR, UBE2V1, UBE2L6, POM121, ARIH1, NUPL1, SOCS3 (GWAS) IL1R2, NUP188, HGF, IRF3, GBP1, EIF4G3, BLNK, UBE2N, IFIT2, NUP214, IFNB1, IFNA1, IFNA2, IFNA8, IFNG, HRAS, KPNA3, PIN1, SOS1, INPP5D, MAP3K3, PRKACB, KRAS, KPNA1, MAP2K4, IL1R1, IFNAR2, B2M, UBA52, NFKB1, EIF4E, IRF4, ILIRAP, CSF2RB, IFNA21, SP100, NUP205, RPS27A, CAMK2D, EIF4G1, XAF1, TRIM25, NUP88, SYK, SHC1, EIF4A3, PTPN1, IFI35, VAV1, IRF7, NUP107, EIF4A2, LYN, IFNA10, IFNA16, IFNA17, IFNA4, PTPN2, SEH1L, RAPGEF1, PELI3, YWHAZ, IL2RA, IL2RB, IL6ST, PELI1, PIAS1, EIF2AK2, TEC, IRF1, USP18, FLNB, IRF2, EIF4A1, IL1B, OAS1, PTK2B, PLCG1, SQSTM1, MX1, MX2, NUP37, GBP3, PIK3R3, NEDD4, UBB, YWHAB, HCK, NUPL2, CASP1, OASL, CISH, CSH1, GH1, GH2, NUP62, DDX58, RNASEL, CRKL, AAAS, PSMB8, NUP50, CSF2, IL3, PML, EIF4E3, MAP2K6, INPPL1, PIK3CB, RELA, BTRC, IRAK4, PRKCD, UBA7, IFNGR1, IL6, GBP7, NUP35, MYD88, IL7R, CAMK2A, FYN, NOD1, CAMK2B, IFNA5, SOCS1, ICAM1, CBL, IL18, MAP2K1, MAPK1, UBC, PTPN6, IL5, IL6R, VCAM1, TPR, NRAS, JAK1, SUMO1, EIF4E2, IL2, NUP54, KPNA5, NUP160, TRAF6, SOCS2, ISG20, IRF6, PRL, IRS2, OAS3, IL1RN, PRLR, MAP3K8, YES1, STAT3, IP6K2 |
| <b>rctm0388: Extracellular matrix organization</b>                                                                                                                                                                                                                                                                                                                                                                                                                                                                                                                                                                                                                                                                                                                                                                                                                                                                                                                                                                                                                                                                                                                                                                                                                                                                                                                                                                                                                                                                                                                                                                                                                                                                                                                                                                                                         |
| (TWAS) DDR2, ITGAV, COL6A5, SERPINE1, PLEC, NCAM1, COL2A1, CMA1, CTRB2, COL6A2, TIMP1, COL4A5, BGN, DMD, CASK, COL4A6 (EWAS) MMP2, BCAN, ITGB1, COL3A1, PDGFA, PLOD3, COL6A1, LAMA1, MFAP2, ADAM17, VTN, COL5A3, ITGAX, MMP25, PTPRS, ELANE, THBS1, CRTAP, ITGA2, COL16A1, ITGB3, LOXL3, PLOD1, FBN2, FN1, COL20A1, COL6A6, VCAN, FBN3, COL25A1, MMP19, LEPRE1, COL11A2, BMP4, DDR1, CD44, DST, TLL2, TLL1, LTBP4, BMP1, BMP2, AGRN, COL24A1, P4HB, MMP17, ADAMTS3, PRKCA, LTBP2, COL18A1, BMP7, DCN, LUM (GWAS) COL21A1, COL28A1, LAMA3, NCAN, LOX, MUSK, COL15A1, MMP10, MMP8, NTN4, COL13A1, ADAMTS14, MFAP5, LOXL2, LOXL4, MMP12, MMP3, ITGA8, MATN1, TGFB1, SDC1, FBLN1, COL1A2, TNC, ASPN, HSPG2, LAMC1, EFEMP2, MMP1, COL19A1, COL9A1, COL17A1, CTSL2, MMP20, COL4A4, FBN1, NRXN1, ACTN1, MMP7, HAPLN1, CTSB, PLG, BMP10, FURIN, COL23A1, LRP4, PLOD2, MFAP4, COL10A1, TNN, LAMB3, LTBP1, COL14A1, LAMC2, COL1A1, FBLN5, LTBP3, CTSD, COL12A1, SDC2, COL6A3, MMP16, KLK2, SPP1, FGF2, ADAMTS2, LAMA5, MMP15, LAMC3, PRSS1, TNXB, MATN3, COMP, MFAP1, COL11A1, ITGA5, MMP11, CTSS, LAMA2, KLKB1, PCOLCE, ITGB5, PCOLCE2, PRSS2, TIMP2, TRAPPC4, ITGA6, MMP14, TPSAB1, COL22A1, COL4A2, ITGB4, PPIB, LAMA4, GDF5, CTSL1, COL9A3, LOXL1, TTR, ITGA2B, MMP24, MATN4, SDC4, FMOD, CTSK, TGF2, CD151, CTSG, COL5A2, ITGA9, COL7A1, LAMB2, COL4A3, ITGB8, ELN, COL5A1, DAG1, ACAN, MFAP3, SERPINH1, COL9A2, SDC3, ITGB6, COL8A1, SPARC, MMP13, ADAM9, TGFB3, LEPREL2, LAMB1, COL8A2, EFEMP1, FBLN2, ITGA7, ADAM10, MMP9, LEPREL1, TNR, CTRB1, COL27A1, COL4A1, PDGFB                                                                                                                                                                                                                                                                                       |
| <b>rctm0476: GPCR ligand binding</b>                                                                                                                                                                                                                                                                                                                                                                                                                                                                                                                                                                                                                                                                                                                                                                                                                                                                                                                                                                                                                                                                                                                                                                                                                                                                                                                                                                                                                                                                                                                                                                                                                                                                                                                                                                                                                       |

(TWAS) GNG5, KISS1, HRH2, TAAR9, CGA, TAS2R39, ANXA1, C5, CXCR5, CHRM4, NTS, TAS2R10, TAS2R20, TAS2R19, TAS2R31, TAS2R46, CCL4, CCR7, FFAR2, GNG7, GRPR, LPAR4, P2RY10, HTR2C, AGTR2, BRS3, AVPR2, OPN1LW, P2RY4, CXCR3, APLN, GCGR (EWAS) PPY, S1PR2, SST, GRM2, AVPR1B, GPR4, GNGT2, MC1R, ADORA1, IHH, CX3CL1, PTGER4, GPBAR1, CXCL6, NPBWR1, DHH, RLN3, PTHLH, CALCB, ADRA2B, MLNR, CCL5, CCL3L1, CALCR, EMR2, F2RL3, GRM4, NMB, PTGER1, NPBWR2, WNT7B, GABBR1, PROKR2, TRHR, TAS2R60, P2RY1, TAS1R3, EMR1, CCKBR, AGTR1, PTH2R, LPAR5, PPYR1, ADORA2B, HTR4, NMUR2, GPR18, GNG13, LPAR6, ADRB3, RXFP2, RXFP1, GNB4, S1PR1, CALCA, GNG10, TAS2R50, TAC3, TAS1R1, PTH2, CCR10, WNT10A, MCHR2, HTR5A, KISS1R, CCR8, CCK, PTGIR, WNT7A, CXCR2, P2RY11, NPY5R, P2RY2, CXCR1, PTGER3, TAAR3, GPR65, GRM6, PENK, EDN2, WNT10B, CASR, CD97, UTS2, ADRA2A, F2RL1, WNT1, CXCL1, C3, HCRTR1, S1PR5, GRM1, DRD3, CCL21, GPR17, NPB, CCR6, EDN1, CHRM2, FFAR3, CXCR4, CNR2, HTR1B, CCKAR, DRD5, PTH1R, GNG4, F2, AVP, PTAFR, WNT16, PTH, DRD2, TAS2R42, OPRK1, PYY, GPER, WNT6, GNRHR, ADORA2A, RAMP1, TAS2R30 (GWAS) CXCL13, ADORA3, TAS2R41, GNG8, ADRB2, P2RY12, FZD3, SSTR3, RXFP3, GNRHR2, TACR2, GHRHR, PTGFR, CXCL16, C3AR1, FZD10, AVPR1A, WNT3A, LPAR1, TAS2R13, GIPR, GNG3, S1PR4, CCL3, EMR3, FPR1, FPR2, CCR4, WNT8A, MLN, WNT2B, INSL5, GPR68, WNT5A, TAS2R16, RXFP4, GPR132, OPN5, HCRTR2, HTR1E, OPRM1, MTNR1B, IAPP, HEBP1, WNT4, CHRM3, PTGER2, CXCL9, NPY1R, CD55, SSTR1, NMU, ADM2, GALR1, TBXA2R, TACR1, FZD9, IL8, RRH, ADRA1A, MC3R, GNRH1, CCL27, CCL20, FZD7, CALCRL, OXER1, LHCCR, PDYN, NPY, FFAR1, NPFF, NPSR1, SHH, HTR7, HTR2B, FZD6, GRM3, EDNRA, XCL1, XCL2, MC4R, CXCL12, WNT9B, FPR3, GCG, PPBP, S1PR3, SSTR5, NPFFR1, TAS2R1, RHO, SSTR4, RAMP2, FSHR, CCL2, CCL7, DRD4, SCT, GALR3, GAL, GNG11, GNGT1, WNT9A, KNG1, DRD1, CCL19, CCL21, APP, FZD4, MC2R, MCSR, DARCC, CCL11, INSL3, GPRC6A, NTSR1, NMBR, F2R, NPS, CXCL2, CXCL3, CXCL5, LPAR2, HRH4, CCR2, CCR5, NPW, PTCH1, NPFFR2, GRM5, GRM7, CYSLTR1, GHRL, CX3CR1, OPN4, PRLHR, C5AR1, GNB5, TACR3, LTB4R, LTB4R2, OPN1SW, WNT8B, TAS2R3, TAS2R4, EDN3, FSHB, SAA1, TAAR6, TAAR8, AGT, CXCR7, GNB2, PTGDR, FZD1, CRHR2, PRLH, XCR1, CCBP2, OXTR, F2RL2, TAS2R38, SMO, WNT2, CHRM5, NMS, BDKRB1, BDKRB2, RGR, GPR55, OPRD1, GRP, CHRM1, HTR1A, P2RY13, ADM, CCL25, HTR1F, CCRL2, TAS2R40, GABBR2, LPAR3, PTCH2, GHSR, GNG2, MCHR1, CCR1, CCR3, OPR1, GHRH, GNRH2, GNAS, PROK2, HRH3, OXT, ADRA1D, TAS1R2, PROK1, CCL17, CCL22, GALR2, FZD8, CCR9, CXCR6, SUCNR1, NPY2R, MTNR1A, ADRA1B, SSTR2, OPN3, GPR31, FZD2, TSHB, HTR1D, FZD5, NTSR2, PROKR1, POMC, QRFP, CNR1, TAS2R5, TAC1, ADCYAP1R1, QRFP, ADRB1, APLNR, TSHR, GIP, GPR77, GNB3, TAS2R14, HTR2A, RAMP3, CRH, GNB1, GNG12, HTR6, NMUR1, SCTR, HRH1, ADRA2C, PF4, CXCL11, CCL28, GRM8, RLN2, WNT11, P2RY6, PMCH, EDNRB, HCRT, CRHR1, UTS2R, LHB, CCL16, CCL23, GPR39, TRH, TAAR1, TAAR2, TAAR5, GLP1R, ADCYAP1, PNOC, OXGR1, CYSLTR2, CCRL1, P2RY14, WNT3, GLP2R, TAS2R7, TAS2R8, TAS2R9, CXCL10

**rcctm0647: Lipid digestion, mobilization, and transport**

(TWAS) CEL, A2M (EWAS) LIPE, PPP1CA, NPC1L1, PLIN1, PPP1CB, PRKACA, LIPC, LPL, LDLRAP1, BMP1, P4HB, CAV1 (GWAS) APOA5, ALB, APOA2, LCAT, SDC1, CUBN, HSPG2, PRKACB, ABCA1, ABCG1, PRKACG, MTPP, FABP4, MGLL, CLPS, PNLIP, PNLIPRP2, AMN, PLTP, LPA, APOC2, APOE, ABCG5, ABCG8, SAR1B, PPP1CC, APOA1, APOA4, APOC3, ABHD5, LDLR, CETP, SCARB1, APOB

**rcctm0648: Lipoprotein metabolism**

(TWAS) A2M (EWAS) LIPC, LPL, LDLRAP1, BMP1, P4HB (GWAS) APOA5, ALB, APOA2, LCAT, SDC1, CUBN, HSPG2, ABCA1, ABCG1, MTPP, AMN, PLTP, LPA, APOC2, APOE, SAR1B, APOA1, APOA4, APOC3, LDLR, CETP, SCARB1, APOB

**rcctm0686: Metabolism of lipids and lipoproteins**

(TWAS) CYP27A1, NEU2, MMAA, HPGD, CGA, ABCB4, CEL, LPCAT3, A2M, GALC, RORA, MED9 (EWAS) ACOX3, ABCC1, PLA2G4D, LIPE, TBL1XR1, PIK3R1, PTEN, TEAD2, CDS2, DPEP1, CH25H, PLA2G6, CHAT, CYP11B2, NEU3, MED25, SLC10A1, ELOVL6, AGPS, PLD2, PPP1CA, PLA2G4E, TNFRSF21, PLA2G16, PDSS2, MAPKAPK2, SEC23A, PEMT, ACAA1, IDH1, NEU4, HEXB, NPC1L1, HMGCL, SYNJ1, ACADL, CDK8, PPP1CB, PRKACA, LGMN, GC, PCCB, PIK3R2, PTGS1, KPNB1, LCLAT1, ALAS1, SRD5A1, PIK3R4, CARM1, MED18, PLD3, CHKA, RAN, RXRA, PCYT1A, PSAP, VAPB, INPP5E, PTGES, PIK3CA, ARSI, PI4K2A, LIPC, SLC25A20, ARNTL, DHCR24, ARSJ, CYP7B1, GPX4, SREBF1, SMPD1, SLC27A2, PIK3C2B, LPL, HACL1, CD36, PTDSS2, ACAT1, PGS1, ACSL5, IDI1, GBA3, CYP1A1, PLA2G4C, PIK3R5, CYP2J2, MED13, YAP1, TPTE2, LDLRAP1, PI4KB, SEC24D, SEC24B, PIK3CD, PPARGC1B, PLBD1, NCOR1, SLC27A5, AMACR, MED10, BMP1, CYP46A1, COL4A3BP, CYP51A1, LPIN1, EPHX2, P4HB, NEU1, CYP27B1, CAV1, ACACA, SCAP, CSNK1G2, MTMR6, ACLY, PTDSS1 (GWAS) PPARGC1A, CDS1, SEC24A, AGPAT2, FDP5, GBA, PISD, MCEE, GPX2, HSD17B12, PPAP2C, SULT2A1, SLC44A2, ECHS1, APOA5, PITPNB, ALB, DEGS1, SEC24C, SGMS1, ETNK1, FAR2, CBR1, MED11, TGS1, CYP2R1, SLC01A2, AKR1C4, ARF1, HMGCS1, TEAD3, PTPMT1, SLC01B1, ALOX12, ALOX15B, AGPAT3, GPD1, ANKRD1, GPAM, PNPLA2, PRKAA2, IDI2, APOA2, PPARG, DPEP2, LCAT, HSD17B7, COQ5, CYP1A2, HEXA, CYP11A1, CHD9, MED26, INPP5D, SDC1, GLB1, STARD4, PRKAG2, NFYC, CUBN, PLA2G1B, SRD5A2, HSPG2, HSD3B2, ETNK2, HMGCS2, PTGS2, PRKACB, ELOVL2, SMPD2, MVK, SLC27A1, ABCA1, NCOA3, PPAP2A, ABCG1, UGCG, PIP5K1B, PRKACG, PLA2G4A, CYP17A1, AKR1C1, HSD3B7, PIP5K1C, HSD17B4, WWTR1, ARSA, MBOAT1, EP300, ELOVL7, CYP4F11, MTPP, ACSL1, SPHK2, PI4KA, SLC44A1, PLA2G4F, ELOVL1, PPM1L, SP1, LRP2, PI4K2B, TEAD1, CYP2U1, LTA4H, TBXAS1, CRLS1, HMGCR, ABCC3, INPP4B, PLA2G5, PIK3C3, DECR1, CYP4F3, CYP4F8, AKR1C3, GBA2, PIK3C2A, GGT1, AGPAT5, ARSG, HSD11B1, ELOVL5, CYP24A1, MLYCD, SMARCD3, PLA2G3, ACADVL, ESRR, CYP4A22, PCCA, FABP4, ALOX5, SIN3B, MGLL, TEAD4, GAL3ST1, CYP19A1, HSD17B3, GM2A, SACM1L, PLD4, DFDT1, ARSK, CLPS, ACADM, PRKD1, CYP1B1, CRAT, GPD2, COQ6, ARSB, HADHB, SGPP2, PLA2G2A, PLA2G2E, PNLIP, PNLIPRP2, OXCT1, SIN3A, AMN, VAC14, ACOX1, SGPL1, PLD1, CYP8B1, ELOVL4, MTMR2, PDSS1, ASAH1, SMPD3, ACER1, GRHL1, CYP21A2, ACOT8, CTS, PLTP, LSS, NCOA2, NCOR2, DEGS2, CREBBP, CDIPT, HDAC3, MTMR14, SPTLC3, ENPP7, MTMR7, NPAS2, MED27, RGL1, LPA, BAAT, MED22, MED8, FADS1, FADS2, APOC2, APOE, AGT, NRF1, SPHK1, ACER3, GLIPR1, CYP4B1, PIK3R3, ACOX2, MVD, SCP2, MED19, LPIN3, PMVK, PPAP2B, AGPAT6, FABP6, DHCR7, FABP1, DGAT1, VAPA, SLC44A4, OSBP, LTC4S, PTGIS, ME1, DGAT2, ABCB11, ABCG5, ABCG8, NCOA6, INSIG2, NFYA, COQ3, AKR1C2, SAR1B, PPP1CC, SUMF2, CCNC, STARD6, GNPAT, SLC25A1, SPTLC2, COQ7, ALOX12B, G0S2, ASAH2, PTGRI, PLA2G2F, MED21, MED29, ALOX15, PRKAB2, FASN, ACSL6, MED16, PIP5K1A, TRIB3, INPPL1, MTMR3, SC5DL, PIK3CB, INPP4A, PIK3CG, FAR1, MED13L, ANGPL4, CERK, COQ2, AGPAT9, APOA1, APOA4, APOC3, CEPT1, CYP4F2, GGPS1, CYP39A1, ACER2, LPCAT4, PIK3R6, LPIN2, CYP4F22, MED15, HADH, CHPT1, HADHA, CPT2, CYP4A11, LBR, FHL2, PLB1, NCOA1, MED17, POMC, ABHD5, PLA2G2D, AKR1D1, PNPLA8, MED30, SPTLC1, TM7SF2, SUMF1, ACADS, PEX11A, MBTPS1, PHOSPHO1, MED31, LDLR, SLC25A17, SREBF2, TXNRD1, NFYB, ARF3, PTGES3, ACACB, FIG4, SYNJ2, PNPLA3, CYP7A1, MTMR4, NR1D1, HSD17B1, LPGAT1, SLC44A5, HSD3B1, MBOAT2, GLB1L, ACSL3, GPD1L, PLA2G12A, CLOCK, SGMS2, TIAM2, ACHE, CYP11B1, CYP2C19, CYP2C9, CYP2C8, ELOVL3, PHYH, CPT1A, SLC01B3, MED6, CROT, SGPP1, BDH1, CETP, PLA2G10, PLD6, LHB, CHKB, CPT1B, GPX1, SCARB1, PIK3CG, STARD5, AGPAT4, APOB, SLC44A3, MUT, CTGF, AKR1B1, MED4, SLC10A2, PPARA, SQLE, ALOX5AP, INSIG1

**rcctm1162: Smooth Muscle Contraction**

(EWAS) MYL9, MYL6, SORBS3, ACTA2, MYLK, TPM3, MYL6B (GWAS) TPM2, MYH11, SORBS1, PXN, MYL12B, LMOD1, ACTG2, TLN1, VCL, CALM1, TPM1, ITGB5, ITGA1, TPM4, CALD1



Supplementary Table 22 Drug repositioned for key drivers in the WMH gene network (PHARMOMICS)

| Database                                                                         | Drug/Small Molecule | Class/Mechanism of Action                                                                                       | Overlap Statistics* |      |               |            |          |                | Overlapped Genes                           |
|----------------------------------------------------------------------------------|---------------------|-----------------------------------------------------------------------------------------------------------------|---------------------|------|---------------|------------|----------|----------------|--------------------------------------------|
|                                                                                  |                     |                                                                                                                 | Dose                | Time | Jaccard Score | Odds Ratio | P.value  | FDR adjusted P |                                            |
| <b><i>in vivo</i> PharmOmics results (human cardiovascular system)</b>           |                     |                                                                                                                 |                     |      |               |            |          |                |                                            |
| GSE15482, GSE15483, GSE15494, GSE2450, GSE8686                                   | Antihyperlipidemic  | Antihyperlipidemic                                                                                              | -                   | -    | 0.007         | 19.00      | 1.22E-04 | 4.22E-03       | <i>IFIT1, ESR1, SERPING1, RTP4</i>         |
| GSE15482, GSE15483, GSE15494                                                     | Fenofibrate         | Antihyperlipidemic (Peroxisome proliferator-activated receptor alpha agonist; triglyceride synthesis inhibitor) | -                   | -    | 0.005         | 13.41      | 2.17E-03 | 3.38E-02       | <i>ESR1, SERPING1, IFIT1</i>               |
| GSE37748                                                                         | Zidovudine          | HIV antiviral (Reverse transcriptase inhibitor)                                                                 | -                   | -    | 0.011         | 28.78      | 2.75E-03 | 3.97E-02       | <i>IFIT1, COL3A1</i>                       |
| GSE34381                                                                         | Melphalan           | Chemotherapy (Alkylating agent)                                                                                 | -                   | -    | 0.010         | 26.09      | 3.33E-03 | 3.97E-02       | <i>IFIT1, NTS</i>                          |
| GSE62203                                                                         | Glucose             | Diabetes-inducing                                                                                               | -                   | -    | 0.010         | 25.66      | 3.43E-03 | 3.97E-02       | <i>TAGLN, COL1A2</i>                       |
| <b><i>in vivo</i> PharmOmics results (human nervous system)</b>                  |                     |                                                                                                                 |                     |      |               |            |          |                |                                            |
| GSE46311                                                                         | Somatostatin        | Hemostasis in adenoma (somatostatin receptor agonist)                                                           | -                   | -    | 0.010         | 26.09      | 3.33E-03 | 3.97E-02       | <i>ESR1, BRS3</i>                          |
| GSE29555, GSE44456, GSE49376, GSE53808                                           | Ethanol             | Disinfectant                                                                                                    | -                   | -    | 0.006         | 15.94      | 8.53E-03 | 4.82E-02       | <i>TAGLN, GAL</i>                          |
| <b><i>in vitro</i> L1000 Profiles (murine oligodendroglial precursor cells)*</b> |                     |                                                                                                                 |                     |      |               |            |          |                |                                            |
| L1000_NMH002_NEU_6H                                                              | SB-216763           | glycogen synthase kinase inhibitor                                                                              | 10 uM               | 6hr  | 0.018         | 57.02      | 1.06E-07 | 3.47E-05       | <i>COL3A1, PCOLCE, RTP4, COL1A2, TAGLN</i> |
| L1000_CPC014_NEU_24H                                                             | Ochratoxin-a        | phenylalanyl tRNA synthetase inhibitor                                                                          | 10 uM               | 24hr | 0.018         | 55.85      | 1.17E-07 | 3.60E-05       | <i>IFIT1, SERPING1, COL3A1, GAL, TAGLN</i> |
| L1000_CPC014_NEU_24H                                                             | VX-222              | hepatitis c virus inhibitor RNA-directed RNA polymerase inhibitor                                               | 10 uM               | 24hr | 0.019         | 54.53      | 2.14E-06 | 3.42E-04       | <i>COL3A1, IFIT1, PCOLCE, COL1A2</i>       |
| L1000_NMH002_NEU_24H                                                             | Isotretinoin        | retinoid receptor agonist                                                                                       | 10 uM               | 24hr | 0.018         | 52.40      | 2.50E-06 | 3.42E-04       | <i>COL3A1, SERPING1, NTS, COL1A2</i>       |
| L1000_NMH002_NEU_24H                                                             | Nicotinamide        | oxidoreductase stimulant                                                                                        | 10 uM               | 24hr | 0.017         | 49.32      | 3.18E-06 | 3.42E-04       | <i>ISLR, IFIT1, PCOLCE, SERPING1</i>       |
| L1000_CPC014_NEU_24H                                                             | BRD-K48576794       | aromatic amid                                                                                                   | 10 uM               | 24hr | 0.015         | 44.53      | 4.69E-06 | 3.74E-04       | <i>ISLR, COL3A1, ESR1, SERPING1</i>        |
| L1000_CPC012_NEU_24H                                                             | Nikkomycin          | chitinase inhibitor                                                                                             | 10 uM               | 24hr | 0.014         | 41.26      | 6.30E-06 | 4.31E-04       | <i>FMOD, SERPING1, TAGLN, COL1A2</i>       |
| L1000_DOSBIO002_NEU_24H                                                          | Wortmannin          | DNA dependent protein kinase inhibitor                                                                          | 1.1 uM              | 24hr | 0.014         | 41.26      | 6.30E-06 | 4.31E-04       | <i>FMOD, COL3A1, COL1A2, TAGLN</i>         |
| L1000_CPC013_NEU_24H                                                             | BRD-K58547240       | a member of quinazolines                                                                                        | 10 uM               | 24hr | 0.014         | 37.81      | 1.13E-04 | 4.22E-03       | <i>GAL, NTS, KNG1</i>                      |
| L1000_NMH001_NEU_6H                                                              | Zonisamide          | gamma aminobutyric acid (GABA) receptor                                                                         | 10 uM               | 6hr  | 0.013         | 36.48      | 1.25E-04 | 4.22E-03       | <i>GAL, COL3A1, IFIT1</i>                  |
| L1000_CPC013_NEU_24H                                                             | ST-4070169          | a beta-diketone                                                                                                 | 10 uM               | 24hr | 0.013         | 35.83      | 1.32E-04 | 4.22E-03       | <i>COL3A1, IFIT1, TAGLN</i>                |
| L1000_NMH001_NEU_6H                                                              | BIX-01294           | DNA methyltransferase inhibitor                                                                                 | 10 uM               | 6hr  | 0.013         | 35.31      | 1.37E-04 | 4.22E-03       | <i>KNG1, IFIT1, ESR1</i>                   |
| L1000_CPC012_NEU_24H                                                             | BRD-K44494044       | amidobenzoic acid                                                                                               | 10 uM               | 24hr | 0.013         | 34.65      | 1.45E-04 | 4.22E-03       | <i>COL3A1, PCOLCE, COL1A2</i>              |
| L1000_NMH002_NEU_24H                                                             | Epoxycholesterol    | liver x receptors (LXR) agonist                                                                                 | 10 uM               | 24hr | 0.012         | 33.87      | 1.55E-04 | 4.22E-03       | <i>COL3A1, COL1A2, TAGLN</i>               |
| L1000_CPC013_NEU_24H                                                             | Epothilone-a        | microtubule stabilizing agent                                                                                   | 10 uM               | 24hr | 0.012         | 32.70      | 1.72E-04 | 4.22E-03       | <i>ESR1, SERPING1, KNG1</i>                |
| L1000_NMH001_NEU_6H                                                              | Cycloheximide       | glycogen synthase kinase inhibitor                                                                              | 10 uM               | 6hr  | 0.012         | 32.70      | 1.72E-04 | 4.22E-03       | <i>PCOLCE, ESR1, GAL</i>                   |
| L1000_NMH002_NEU_24H                                                             | Kenpauillone        | glycogen synthase kinase inhibitor                                                                              | 10 uM               | 24hr | 0.012         | 32.14      | 1.80E-04 | 4.22E-03       | <i>COL3A1, NTS, TAGLN</i>                  |
| L1000_CPC012_NEU_24H                                                             | BRD-K03857568       | a member of quinolines and a nitro compound                                                                     | 10 uM               | 24hr | 0.011         | 29.96      | 2.21E-04 | 4.37E-03       | <i>ESR1, NTS, COL3A1</i>                   |
| L1000_CPC012_NEU_24H                                                             | BRD-A36884011       | a member of benzamides                                                                                          | 10 uM               | 24hr | 0.011         | 29.38      | 2.34E-04 | 4.44E-03       | <i>PCOLCE, COL3A1, COL1A2</i>              |
| L1000_NMH002_NEU_6H                                                              | Epoxycholesterol    | liver x receptors (LXR) agonist                                                                                 | 10 uM               | 6hr  | 0.010         | 26.83      | 3.15E-03 | 3.97E-02       | <i>COL3A1, SERPING1</i>                    |

| Database                | Drug/Small Molecule               | Class/Mechanism of Action                               | Overlap Statistics* |      |               |            |          |                | Overlapped Genes         |
|-------------------------|-----------------------------------|---------------------------------------------------------|---------------------|------|---------------|------------|----------|----------------|--------------------------|
|                         |                                   |                                                         | Dose                | Time | Jaccard Score | Odds Ratio | P.value  | FDR adjusted P |                          |
| L1000_NMH002_NEU_6H     | Androstenol                       | gamma aminobutyric acid (GABA) receptor modulator       | 10 uM               | 6hr  | 0.010         | 26.53      | 3.22E-03 | 3.97E-02       | <i>NTS, KNG1</i>         |
| L1000_NMH002_NEU_6H     | Cortisone                         | glucocorticoid receptor agonist                         | 10 uM               | 6hr  | 0.010         | 25.12      | 3.58E-03 | 3.97E-02       | <i>PCOLCE, TAGLN</i>     |
| L1000_CPC014_NEU_24H    | Geldanamycin                      | heat shock protein (HSP) inhibitor                      | 10 uM               | 24hr | 0.010         | 24.85      | 3.65E-03 | 3.97E-02       | <i>ARHGAP6, SERPING1</i> |
| L1000_NMH002_NEU_24H    | Estradiol                         | estrogen receptor agonist                               | 10 uM               | 24hr | 0.010         | 24.85      | 3.65E-03 | 3.97E-02       | <i>COL3A1, ECEL1</i>     |
| L1000_DOSBIO001_NEU_24H | Trichostatin-a                    | CDK expression enhancer                                 | 10 uM               | 24hr | 0.009         | 24.59      | 3.73E-03 | 3.97E-02       | <i>COL3A1, IFIT1</i>     |
| L1000_NMH002_NEU_24H    | Trichostatin-a                    | CDK expression enhancer                                 | 10 uM               | 24hr | 0.009         | 24.22      | 3.84E-03 | 3.97E-02       | <i>IFIT1, ESRI</i>       |
| L1000_NMH002_NEU_6H     | Gingerol                          | nitric oxide synthase inhibitor                         | 10 uM               | 6hr  | 0.009         | 23.73      | 3.99E-03 | 3.97E-02       | <i>ESRI, GAL</i>         |
| L1000_CPC016_NEU_24H    | Trichostatin-a                    | CDK expression enhancer                                 | 10 uM               | 24hr | 0.009         | 23.35      | 4.11E-03 | 3.97E-02       | <i>COL3A1, IFIT1</i>     |
| L1000_NMH002_NEU_6H     | PP-2                              | src inhibitor                                           | 10 uM               | 6hr  | 0.009         | 23.35      | 4.11E-03 | 3.97E-02       | <i>SERPING1, COL1A2</i>  |
| L1000_CPC012_NEU_24H    | K784-3131                         | an organonitrogen compound and an organooxygen compound | 10 uM               | 24hr | 0.009         | 22.79      | 4.31E-03 | 3.97E-02       | <i>COL3A1, GAL</i>       |
| L1000_CPC012_NEU_24H    | Fludarabine                       | DNA synthesis inhibitor                                 | 10 uM               | 24hr | 0.009         | 22.68      | 4.35E-03 | 3.97E-02       | <i>COL1A2, COL3A1</i>    |
| L1000_CPC016_NEU_24H    | Geldanamycin                      | heat shock protein (HSP) inhibitor                      | 10 uM               | 24hr | 0.009         | 22.57      | 4.39E-03 | 3.97E-02       | <i>COL3A1, PCOLCE</i>    |
| L1000_NMH002_NEU_24H    | TWS-119                           | glycogen synthase kinase inhibitor                      | 10 uM               | 24hr | 0.009         | 22.47      | 4.43E-03 | 3.97E-02       | <i>COL1A2, COL3A1</i>    |
| L1000_NMH002_NEU_24H    | MG-132                            | proteasome inhibitor                                    | 10 uM               | 24hr | 0.009         | 22.15      | 4.55E-03 | 3.97E-02       | <i>SERPING1, GAL</i>     |
| L1000_DOSBIO002_NEU_24H | Trichostatin-a                    | CDK expression enhancer                                 | 10 uM               | 24hr | 0.009         | 22.05      | 4.59E-03 | 3.97E-02       | <i>COL3A1, IFIT1</i>     |
| L1000_CPC014_NEU_24H    | STK-397047                        |                                                         | 10 uM               | 24hr | 0.009         | 21.95      | 4.63E-03 | 3.97E-02       | <i>IFIT1, ARHGAP6</i>    |
| L1000_CPC013_NEU_24H    | Trichostatin-a                    | CDK expression enhancer                                 | 10 uM               | 24hr | 0.008         | 21.85      | 4.67E-03 | 3.97E-02       | <i>IFIT1, TAGLN</i>      |
| L1000_NMH002_NEU_6H     | Forskolin                         | growth hormone receptor agonist                         | 10 uM               | 6hr  | 0.008         | 21.75      | 4.71E-03 | 3.97E-02       | <i>COL3A1, COL1A2</i>    |
| L1000_CPC012_NEU_24H    | PD-168077                         | dopamine receptor agonist                               | 10 uM               | 24hr | 0.008         | 21.55      | 4.80E-03 | 3.97E-02       | <i>NTS, COL1A2</i>       |
| L1000_CPC013_NEU_24H    | Sitagliptin                       | insulin secretagogue                                    | 10 uM               | 24hr | 0.008         | 21.55      | 4.80E-03 | 3.97E-02       | <i>SERPING1, COL1A2</i>  |
| L1000_NMH002_NEU_24H    | RHO-kinase-inhibitor-III[rockout] | ROCK inhibitor                                          | 10 uM               | 24hr | 0.008         | 21.55      | 4.80E-03 | 3.97E-02       | <i>ESRI, COL3A1</i>      |
| L1000_NMH002_NEU_6H     | Troglitazone                      | insulin sensitizer                                      | 10 uM               | 6hr  | 0.008         | 21.55      | 4.80E-03 | 3.97E-02       | <i>COL3A1, COL1A2</i>    |
| L1000_NMH002_NEU_6H     | Thapsigargin                      | calcium channel blocker                                 | 10 uM               | 6hr  | 0.008         | 21.55      | 4.80E-03 | 3.97E-02       | <i>ESRI, GAL</i>         |
| L1000_NMH002_NEU_6H     | Resveratrol                       | apolipoprotein expression enhancer                      | 10 uM               | 6hr  | 0.008         | 21.45      | 4.84E-03 | 3.97E-02       | <i>COL3A1, COL1A2</i>    |
| L1000_CPC013_NEU_24H    | Trichostatin-a                    | CDK expression enhancer                                 | 10 uM               | 24hr | 0.008         | 21.06      | 5.01E-03 | 3.97E-02       | <i>COL3A1, IFIT1</i>     |
| L1000_CPC013_NEU_24H    | Ispinesib                         | kinesin inhibitor                                       | 10 uM               | 24hr | 0.008         | 20.97      | 5.05E-03 | 3.97E-02       | <i>GAL, ESRI</i>         |
| L1000_CPC013_NEU_24H    | AT-7519                           | cell cycle inhibitor                                    | 10 uM               | 24hr | 0.008         | 20.35      | 5.36E-03 | 3.97E-02       | <i>GAL, SERPING1</i>     |
| L1000_CPC014_NEU_24H    | Vinorelbine                       | apoptosis stimulant, microtubule inhibitor              | 10 uM               | 24hr | 0.008         | 20.26      | 5.40E-03 | 3.97E-02       | <i>ESRI, NTS</i>         |
| L1000_CPC012_NEU_24H    | BRD-K70771662                     | a member of benzamides                                  | 10 uM               | 24hr | 0.008         | 20.17      | 5.45E-03 | 3.97E-02       | <i>SERPING1, GAL</i>     |
| L1000_NMH002_NEU_24H    | Cholic-acid                       | ferrochelataze inhibitor                                | 10 uM               | 24hr | 0.008         | 20.17      | 5.45E-03 | 3.97E-02       | <i>COL3A1, IFIT1</i>     |
| L1000_DOSBIO001_NEU_24H | Vorinostat                        | HDAC inhibitor cell cycle inhibitor                     | 10 uM               | 24hr | 0.008         | 19.58      | 5.76E-03 | 3.97E-02       | <i>IFIT1, TAGLN</i>      |
| L1000_NMH002_NEU_6H     | Tretinoin                         | retinoid receptor agonist                               | 10 uM               | 6hr  | 0.008         | 19.58      | 5.76E-03 | 3.97E-02       | <i>ISLR, ESRI</i>        |
| L1000_NMH002_NEU_24H    | Tretinoin                         | retinoid receptor agonist                               | 10 uM               | 24hr | 0.008         | 19.42      | 5.85E-03 | 3.97E-02       | <i>COL3A1, COL1A2</i>    |
| L1000_NMH001_NEU_6H     | Spiperone                         | dopamine receptor antagonist                            | 10 uM               | 6hr  | 0.007         | 18.95      | 6.13E-03 | 3.99E-02       | <i>COL3A1, PCOLCE</i>    |
| L1000_NMH002_NEU_6H     | Amiodarone                        | adrenergic receptor antagonist                          | 10 uM               | 6hr  | 0.007         | 18.72      | 6.28E-03 | 4.01E-02       | <i>ISLR, ESRI</i>        |
| L1000_NMH001_NEU_6H     | Pifithrin-mu                      | HSP inhibitor                                           | 10 uM               | 6hr  | 0.007         | 18.30      | 6.56E-03 | 4.04E-02       | <i>COL3A1, COL1A2</i>    |
| L1000_CPC012_NEU_24H    | BRD-A36165599                     | amino acid amide                                        | 10 uM               | 24hr | 0.007         | 17.87      | 6.86E-03 | 4.11E-02       | <i>RTP4, IFIT1</i>       |
| L1000_CPC014_NEU_24H    | KU-55933                          | ATM kinase inhibitor                                    | 10 uM               | 24hr | 0.007         | 17.47      | 7.16E-03 | 4.21E-02       | <i>COL3A1, COL1A2</i>    |

\*Overlap Statistics: Jaccard score is an overlap index of key driver genes with the network. Statistical significance (odds Ratio and P value) of the overlap between WMH-associated key driver genes and the drug/small molecule networks. FDR adjusted P is the overlap P value adjusted for the number of drug/small molecule tested.

## SUPPLEMENTARY REFERENCES

1. Khachaturian ZS. Perspective on the Alzheimer's Disease Neuroimaging Initiative: Progress report and future plans. Published online 2010.
2. Petersen RC, Aisen PS, Beckett LA, et al. Alzheimer's disease neuroimaging initiative (ADNI): clinical characterization. *Neurology*. 2010;74(3):201-209.
3. Wright JD, Folsom AR, Coresh J, et al. The ARIC (Atherosclerosis Risk In Communities) Study: JACC Focus Seminar 3/8. *Journal of the American College of Cardiology*. 2021;77(23):2939-2959. doi:<https://doi.org/10.1016/j.jacc.2021.04.035>
4. Vascular Factors and Risk of Dementia: Design of the Three-City Study and Baseline Characteristics of the Study Population. *Neuroepidemiology*. 2003;22(6):316-325. doi:10.1159/000072920
5. Sachdev PS, Brodaty H, Reppermund S, et al. The Sydney Memory and Ageing Study (MAS): methodology and baseline medical and neuropsychiatric characteristics of an elderly epidemiological non-demented cohort of Australians aged 70–90 years. *International Psychogeriatrics*. 2010;22(8):1248-1264. doi:DOI: 10.1017/S1041610210001067
6. Mishra A, Chauhan G, Violleau MH, et al. Association of variants in HTRA1 and NOTCH3 with MRI-defined extremes of cerebral small vessel disease in older subjects. *Brain : a journal of neurology*. 2019;142(4):1009-1023. doi:10.1093/brain/awz024
7. Allum F, Shao X, Guénard F, et al. Characterization of functional methylomes by next-generation capture sequencing identifies novel disease-associated variants. *Nature communications*. 2015;6:7211. doi:10.1038/ncomms8211
8. Krueger F, Andrews SR. Bismark: a flexible aligner and methylation caller for Bisulfite-Seq applications. *Bioinformatics (Oxford, England)*. 2011;27(11):1571-1572. doi:10.1093/bioinformatics/btr167
9. Friedman GD, Cutter GR, Donahue RP, et al. CARDIA: study design, recruitment, and some characteristics of the examined subjects. *Journal of clinical epidemiology*. 1988;41(11):1105-1116. doi:10.1016/0895-4356(88)90080-7
10. Fried LP, Borhani NO, Enright P, et al. The Cardiovascular Health Study: design and rationale. *Annals of epidemiology*. 1991;1(3):263-276. doi:10.1016/1047-2797(91)90005-w
11. Feinleib M, Kannel WB, Garrison RJ, McNamara PM, Castelli WP. The Framingham Offspring Study. Design and preliminary data. *Preventive medicine*. 1975;4(4):518-525. doi:10.1016/0091-7435(75)90037-7
12. Dawber TR, Kannel WB. The Framingham study. An epidemiological approach to coronary heart disease. *Circulation*. 1966;34(4):553-555. doi:10.1161/01.cir.34.4.553
13. Splansky GL, Corey D, Yang Q, et al. The third generation cohort of the National Heart, Lung, and Blood Institute's Framingham Heart Study: design, recruitment, and initial examination. *American journal of epidemiology*. 2007;165(11):1328-1335.
14. Daniels PR, Kardina SLR, Hanis CL, et al. Familial aggregation of hypertension treatment and control in the Genetic Epidemiology Network of Arteriopathy (GENOA) study. *The American journal of medicine*. 2004;116(10):676-681. doi:10.1016/j.amjmed.2003.12.032
15. Wardlaw JM, Bastin ME, Valdés Hernández MC, et al. Brain aging, cognition in youth and old age and vascular disease in the Lothian Birth Cohort 1936: rationale, design and methodology of the imaging protocol. *International Journal of Stroke*. 2011;6(6):547-559.
16. Deary IJ, Gow AJ, Taylor MD, et al. The Lothian Birth Cohort 1936: a study to examine influences on cognitive ageing from age 11 to age 70 and beyond. *BMC geriatrics*. 2007;7(1):1-12.
17. Sachdev PS, Lammel A, Trollor JN, et al. A comprehensive neuropsychiatric study of elderly twins: the Older Australian Twins Study. *Twin Research and Human Genetics*. 2009;12(6):573-582.
18. Sachdev PS, Lee T, Lammel A, et al. Cognitive functioning in older twins: The Older Australian Twins Study. *Australasian Journal on Ageing*. 2011;30(s2):17-23. doi:<https://doi.org/10.1111/j.1741-6612.2011.00534.x>

19. Ikram MA, van der Lugt A, Niessen WJ, et al. The Rotterdam Scan Study: design update 2016 and main findings. *European journal of epidemiology*. 2015;30(12):1299-1315. doi:10.1007/s10654-015-0105-7
20. Ikram MA, Brusselle GGO, Murad SD, et al. The Rotterdam Study: 2018 update on objectives, design and main results. *European journal of epidemiology*. 2017;32(9):807-850. doi:10.1007/s10654-017-0321-4
21. Hofman A, van Duijn CM, Franco OH, et al. The Rotterdam Study: 2012 objectives and design update. *European journal of epidemiology*. 2011;26(8):657.
22. Breteler MMB, Stöcker T, Pracht E, Brenner D, Stirnberg R. IC-P-165: MRI in the Rhineland study: a novel protocol for population neuroimaging. *Alzheimer's & Dementia*. 2014;10:P92-P92.
23. Breteler MMB, Wolf H. P2-135: THE RHINELAND STUDY: A NOVEL PLATFORM FOR EPIDEMIOLOGIC RESEARCH INTO ALZHEIMER DISEASE AND RELATED DISORDERS. *Alzheimer's & Dementia*. 2014;10:P520-P520.
24. Volzke H, Alte D, Schmidt CO, et al. Cohort profile: the study of health in Pomerania. *International journal of epidemiology*. 2011;40(2):294-307. doi:10.1093/ije/dyp394
25. Jack CRJ, Bernstein MA, Fox NC, et al. The Alzheimer's Disease Neuroimaging Initiative (ADNI): MRI methods. *Journal of magnetic resonance imaging : JMRI*. 2008;27(4):685-691. doi:10.1002/jmri.21049
26. Wolz R, Julkunen V, Koikkalainen J, et al. Multi-method analysis of MRI images in early diagnostics of Alzheimer's disease. *PloS one*. 2011;6(10):e25446. doi:10.1371/journal.pone.0025446
27. DeCarli C, Murphy DG, Teichberg D, Campbell G, Sobering GS. Local histogram correction of MRI spatially dependent image pixel intensity nonuniformity. *Journal of magnetic resonance imaging : JMRI*. 1996;6(3):519-528. doi:10.1002/jmri.1880060316
28. Bryan RN, Manolio TA, Schertz LD, et al. A method for using MR to evaluate the effects of cardiovascular disease on the brain: the cardiovascular health study. *AJNR American journal of neuroradiology*. 1994;15(9):1625-1633.
29. Maillard P, Delcroix N, Crivello F, et al. An automated procedure for the assessment of white matter hyperintensities by multispectral (T1, T2, PD) MRI and an evaluation of its between-centre reproducibility based on two large community databases. *Neuroradiology*. 2008;50(1):31-42. doi:10.1007/s00234-007-0312-3
30. Zhu YC, Tzourio C, Soumaré A, Mazoyer B, Dufouil C, Chabriat H. Severity of Dilated Virchow-Robin Spaces Is Associated With Age, Blood Pressure, and MRI Markers of Small Vessel Disease. *Stroke*. 2010;41(11):2483-2490. doi:10.1161/STROKEAHA.110.591586
31. Wardlaw JM, Smith EE, Biessels GJ, et al. Neuroimaging standards for research into small vessel disease and its contribution to ageing and neurodegeneration. *The Lancet Neurology*. 2013;12(8):822-838. doi:10.1016/S1474-4422(13)70124-8
32. Kaffashian S, Tzourio C, Soumaré A, et al. Plasma  $\beta$ -amyloid and MRI markers of cerebral small vessel disease. *Neurology*. 2014;83(22):2038. doi:10.1212/WNL.0000000000001038
33. Jiang J, Liu T, Zhu W, et al. UBO Detector – A cluster-based, fully automated pipeline for extracting white matter hyperintensities. *NeuroImage*. 2018;174:539-549. doi:https://doi.org/10.1016/j.neuroimage.2018.03.050
34. Lao Z, Shen D, Liu D, et al. Computer-assisted segmentation of white matter lesions in 3D MR images using support vector machine. *Academic radiology*. 2008;15(3):300-313. doi:10.1016/j.acra.2007.10.012
35. Jack CRJ, O'Brien PC, Rettman DW, et al. FLAIR histogram segmentation for measurement of leukoaraiosis volume. *Journal of magnetic resonance imaging : JMRI*. 2001;14(6):668-676. doi:10.1002/jmri.10011
36. Vrooman HA, Cocosco CA, van der Lijn F, et al. Multi-spectral brain tissue segmentation using automatically trained k-Nearest-Neighbor classification. *NeuroImage*. 2007;37(1):71-81. doi:10.1016/j.neuroimage.2007.05.018
37. Jiang J, Liu T, Zhu W, et al. UBO Detector – A cluster-based, fully automated pipeline for extracting white matter hyperintensities. *NeuroImage*. 2018;174:539-549. doi:https://doi.org/10.1016/j.neuroimage.2018.03.050

38. Kamnitsas K, Ledig C, Newcombe VFJ, et al. Efficient multi-scale 3D CNN with fully connected CRF for accurate brain lesion segmentation. *Medical Image Analysis*. 2017;36:61-78. doi:<https://doi.org/10.1016/j.media.2016.10.004>
39. Hegenscheid K, Kuhn JP, Volzke H, Biffar R, Hosten N, Puls R. Whole-body magnetic resonance imaging of healthy volunteers: pilot study results from the population-based SHIP study. *RoFo : Fortschritte auf dem Gebiete der Rontgenstrahlen und der Nuklearmedizin*. 2009;181(8):748-759. doi:10.1055/s-0028-1109510
40. Sun S, Zhu J, Mozaffari S, Ober C, Chen M, Zhou X. Heritability estimation and differential analysis of count data with generalized linear mixed models in genomic sequencing studies. *Bioinformatics*. 2019;35(3):487-496. doi:10.1093/bioinformatics/bty644
41. Joehanes R, Ying S, Huan T, et al. Gene expression signatures of coronary heart disease. *Arteriosclerosis, thrombosis, and vascular biology*. 2013;33(6):1418-1426. doi:10.1161/ATVBAHA.112.301169
42. Westra HJ, Peters MJ, Esko T, et al. Systematic identification of trans eQTLs as putative drivers of known disease associations. *Nature genetics*. 2013;45(10):1238-1243. doi:10.1038/ng.2756
43. Schurmann C, Heim K, Schillert A, et al. Analyzing illumina gene expression microarray data from different tissues: methodological aspects of data analysis in the metaxpress consortium. *PloS one*. 2012;7(12):e50938. doi:10.1371/journal.pone.0050938
44. Willer CJ, Li Y, Abecasis GR. METAL: fast and efficient meta-analysis of genomewide association scans. *Bioinformatics*. 2010;26(17):2190-2191.
45. Han, B., & Eskin, E. Random-effects model aimed at discovering associations in meta-analysis of genome-wide association studies. *Am J Hum Genet*. 2011; 88(5): 586-598.
